# Supplementary material for: Three Small Cysteine-Free Proteins (CFP1–3) Are Required for Insect-Pathogenic Lifestyle of Metarhizium robertsii
Source: MDPI journal article supplement (doi:10.3390/jof8060606), 2022-06-06
Supplement: s1 [file s1]

## Three Small Cysteine-Free Proteins (CFP1–3) Are Required for Insect-Pathogenic Lifestyle of *Metarhizium robertsii*

Ya-Ni Mou, Kang Ren, Sheng-Hua Ying, and Ming-Guang Feng \*

(\*Corresponding author. E-mail: mgfeng@zju.edu.cn)

### Contents:

Figure S1. Generation and identification of *cfp1*, *cfp2* and *cfp3* mutants in *M. robertsii*, p. 2

Table S1. Paired primers designed for manipulation of *cfp1*, *cfp2* and *cfp3* in *M. robertsii*, p. 2

Table S2. Differentially expressed genes identified from the transcriptome of *M. robertsii*  $\Delta cfp1$  versus WT strain, pp. 3-12

Table S3. GO analysis of differentially expressed genes in *M. robertsii*  $\Delta cfp1$  versus WT strain, pp. 13-24

Table S4. Summation of GO function classes and terms enriched to *M. robertsii*  $\Delta cfp1$  versus WT strain, pp. 25-27

Table S5. KEGG pathway analysis of differential expressed genes in *M. robertsii*  $\Delta cfp1$  versus WT strain, pp. 28-30

Table S6. Summation of KEGG pathways enriched to *M. robertsii*  $\Delta cfp1$  versus WT strain, p. 30

Table S7. Differentially expressed genes related to phenotypes and genome stability of *M. robertsii*  $\Delta cfp1$  versus WT strain, pp. 31-33

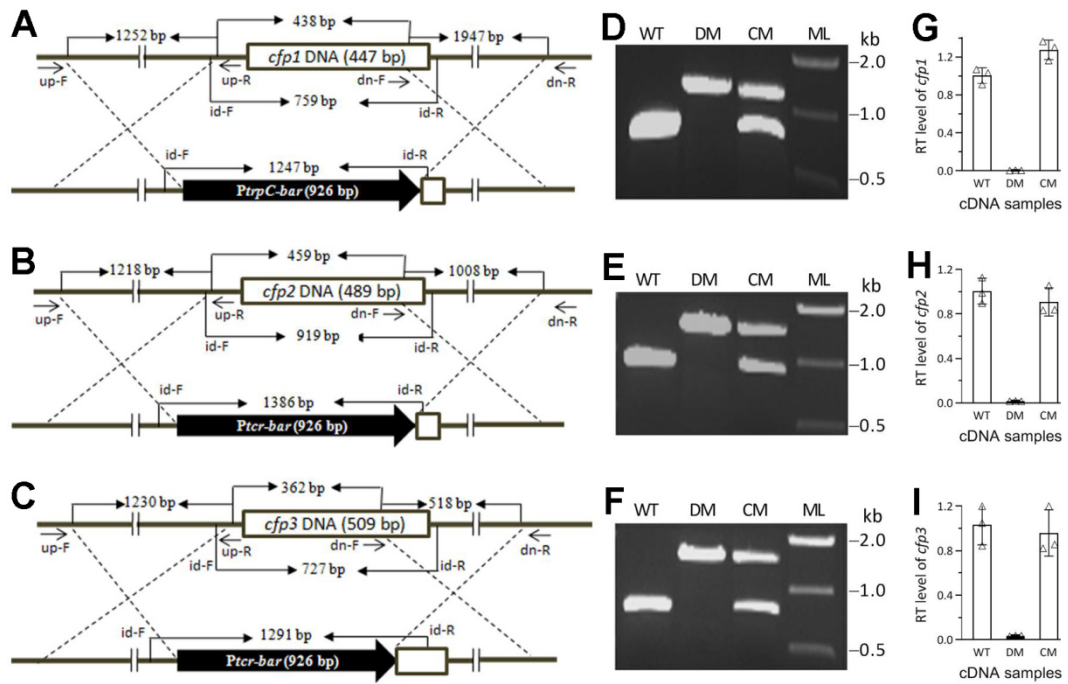

**Figure S1.** Generation and identification of *cfp1*, *cfp2* and *cfp3* mutants in *M. robertsii*. (A–C) Schematic diagrams for the deletion strategies of *cfp1*, *cfp2* and *cfp3*. (D–F) The deletion mutants (DM) and complementation mutants (CM) of *cfp1*, *cfp2* and *cfp3* identified respectively by PCR analysis (ML, DNA molecular ladder) with paired primers (Table S1). The DNA fragments detected from WT, DM and CM indicate successful deletions of partial promoter and coding regions from *cfp1* ( $46+392 = 926+759-1247 = 438$  bp), *cfp2* ( $75+384 = 926+919-1386 = 459$  bp) and *cfp3* ( $16+346 = 926+727-1291 = 362$  bp) as expected or shown in the diagrams, respectively. (G–I) Relative transcript (RT) levels of *cfp1*, *cfp2* and *cfp3* in the cDNA samples derived from the 3 d-old 1/4 SDAY cultures of targeted gene mutants with respect to the WT standard. Error bars: standard deviations from three cDNA samples derived from independent cultures of each strain.

**Table S1.** Paired primers designed for manipulation of *cfp1*, *cfp2* and *cfp3* in *M. robertsii*.

| Primers    | Paired sequences (5' 3')*                                                                                         | Purpose                                                       |
|------------|-------------------------------------------------------------------------------------------------------------------|---------------------------------------------------------------|
| upCfp1-F/R | ACGAGCTGTACAAGTA <u>ACCGGG</u> TGGCAAGCTCCTCTGATC / TGGCTGCAGGTCG<br>ACGGATCCGGTGTCTTTATGGGAAGTTAT                | Cloning <i>cfp1</i> 5'-end (1252 bp)                          |
| dnCfp1-F/R | GACCCATGGCTCGAGT <u>CTAG</u> AATAAGCCTATTGGAACA / GGTGGTGGTGGCT<br>AGCGTTA <u>ACG</u> CACCACGAACCTCTACC           | Cloning <i>cfp1</i> 3'-end (1947 bp)                          |
| flCfp1-F/R | <u>ATCCGTCGACCTGCAGCCAAGCTT</u> GCTTCATCTCATCGTCCAA / <u>ACACTAGTCAGAT</u><br><u>CTTCTAGTGT</u> GTCAACCTCGTGCTCCT | Cloning full-length <i>cfp1</i> (4194 bp) for complementation |
| upCfp2-F/R | ACGAGCTGTACAAGTA <u>ACCGGG</u> GCGTCTGTTATCGGGTTG / TGGCTGCAGGTCG<br>ACGGATCCGCGGTGAGTGTTTGATTT                   | Cloning <i>cfp2</i> 5'-end (1218 bp)                          |
| dnCfp2-F/R | GACCCATGGCTCGAGT <u>CTAG</u> AGGGACGAACAAGGCTAAT / GGTGGTGGTGGCTAG<br>CGTTA <u>ACCA</u> ACATCCATCGCTACGC          | Cloning <i>cfp2</i> 3'-end (1008 bp)                          |
| flCfp2-F/R | <u>ATCCGTCGACCTGCAGCCAAGCTT</u> CGGACCTGATGGAACCTG / <u>ACACTAGTCAGAT</u><br><u>CTTCTAGTGT</u> CGCTGATGCTCGACAAA  | Cloning full-length <i>cfp2</i> (4078 bp) for complementation |
| upCfp3-F/R | ACGAGCTGTACAAGTA <u>ACCGGG</u> CAAAGATTGTGAGCCTGAA / TGGCTGCAGGTC<br>GACGGATCCGGAAGTGTTGGAAGTAGATGA               | Cloning <i>cfp3</i> 5'-end (1230 bp)                          |
| dnCfp3-F/R | GACCCATGGCTCGAGT <u>CTAG</u> AGCCACTTCGTCTGGACAGT / GGTGGTGGTGGCTA<br>GC <u>GTTA</u> ACGCCCTCCTCCGAGATAGTT        | Cloning <i>cfp3</i> 3'-end (1097 bp)                          |
| flCfp3-F/R | <u>ATCCGTCGACCTGCAGCCAAGCTT</u> ACGACGATCTTGACCTG / <u>ACACTAGTCAGAT</u><br><u>CTTCTAGTGT</u> CCGTTCTATGATATGGC   | Cloning full-length <i>cfp3</i> (2071 bp) for complementation |
| pCfp1-F/R  | ACCACCAGAGTTTCCACG / TCACCAAGACCTCGCAAT                                                                           | PCR detecting <i>cfp1</i>                                     |
| pCfp2-F/R  | GCCGGTAGGTGCTCTTAA / AGCGACTGTGGCTTCATC                                                                           | PCR detecting <i>cfp2</i>                                     |
| pCfp3-F/R  | TGTCTCCCAAACAACCTCAAC / GAACCTCACAACGGCTAT                                                                        | PCR detecting <i>cfp3</i>                                     |
| qCfp1-F/R  | AAAACGTTGGCAAGCTCAAT / ATTCGTCCACCACGACTTTC                                                                       | qPCR detecting <i>cfp1</i>                                    |
| qCfp2-F/R  | TTCTTCTTGCCGTCTTTCC / GCTGAGCTGCTCTTCAACT                                                                         | qPCR detecting <i>cfp2</i>                                    |
| qCfp3-F/R  | CCAGACTTCAGCCGTAAAGG / ACATCTTTGCCTCCGTTTG                                                                        | qPCR detecting <i>cfp3</i>                                    |

\* Underlined regions denote introduced cleavage sites of two pairs of restriction enzymes (XmaI/BamHI and XbaI/HpaI) for homologous recombination of 5' and 3' fragments separated by *bar* marker for targeted *cfp* deletion or the recognition fragments to exchange for the gateway fragment.

**Table S2.** Differentially expressed genes identified from the transcriptome of *M. robertsii*  $\Delta$ cp1 versus WT strain.

| gene_id  | gene_name | transcript_id  | log <sub>2</sub> R | q-value  | Annotation                                         |
|----------|-----------|----------------|--------------------|----------|----------------------------------------------------|
| 19254709 | MAA_00423 | XM_007818421.2 | -16.96             | 1.99E-21 | Ribonuclease H-like protein                        |
| 19257485 | MAA_03199 | XM_007821197.1 | -15.31             | 1.80E-11 | hypothetical protein MAA_03199                     |
| 19262961 | MAA_08675 | XM_007826673.1 | -14.89             | 5.61E-05 | hypothetical protein MAA_08675                     |
| 23632372 | MAA_10923 | XM_011412869.1 | -14.77             | 4.07E-09 | Ankyrin repeat-containing domain protein           |
| 19260937 | MAA_06651 | XM_007824649.1 | -14.01             | 1.05E-04 | hypothetical protein MAA_06651                     |
| 19254669 | MAA_00383 | XM_007818381.2 | -13.98             | 9.65E-10 | Ribonuclease H-like protein                        |
| 23633117 | MAA_11669 | XM_011412584.1 | -13.77             | 7.64E-12 | hypothetical protein MAA_11669                     |
| 23632348 | MAA_10899 | XM_011412845.1 | -13.25             | 1.28E-04 | Proteinase inhibitor I78                           |
| 19255569 | MAA_01283 | XM_007819281.2 | -12.64             | 1.02E-07 | Ribonuclease H-like protein                        |
| 23633245 | MAA_11797 | XM_011412985.1 | -12.43             | 2.09E-06 | hypothetical protein MAA_11797                     |
| 19261241 | MAA_06955 | XM_007824953.1 | -11.71             | 1.04E-03 | lipase 2                                           |
| 19262574 | MAA_08288 | XM_007826286.1 | -11.53             | 4.27E-02 | Cyclin-like F-box                                  |
| 19264575 | MAA_10289 | XM_007828287.1 | -11.27             | 3.19E-03 | periplasmic binding protein                        |
| 19264125 | MAA_09839 | XM_007827837.1 | -10.97             | 2.54E-02 | hypothetical protein MAA_09839                     |
| 19264807 | MAA_10521 | XM_007828519.2 | -10.75             | 2.51E-02 | zinc knuckle                                       |
| 19254642 | MAA_00356 | XM_007818354.1 | -10.67             | 4.28E-02 | glycosyl transferase                               |
| 19264862 | MAA_10576 | XM_007828574.1 | -10.62             | 1.25E-02 | Uncharacterized protein MAA_10576                  |
| 19255828 | MAA_01542 | XM_007819540.2 | -10.54             | 4.86E-02 | hypothetical protein MAA_01542                     |
| 23633036 | MAA_11588 | XM_011412503.1 | -9.96              | 3.33E-04 | SET domain protein                                 |
| 19261030 | MAA_06744 | XM_007824742.1 | -9.56              | 1.19E-03 | lysergyl peptide synthetase subunit 3 LPS3         |
| 19262985 | MAA_08699 | XM_007826697.1 | -8.86              | 4.03E-02 | Beta-ketoacyl synthase                             |
| 19254385 | MAA_00099 | XM_007818097.1 | -8.54              | 1.79E-10 | hypothetical protein MAA_00099                     |
| 19261770 | MAA_07484 | XM_007825482.1 | -7.95              | 3.74E-14 | peptidase alpha-lytic pro domain protein           |
| 19263004 | MAA_08718 | XM_007826716.1 | -6.63              | 4.34E-10 | Peptidase S8, subtilisin, Asp-active site protein  |
| 19261481 | MAA_07195 | XM_007825193.2 | -5.86              | 5.55E-08 | protein-tyrosine phosphatase                       |
| 19263490 | MAA_09204 | XM_007827202.1 | -5.66              | 1.11E-18 | Concanavalin A-like lectin/glucanase               |
| 19262600 | MAA_08314 | XM_007826312.2 | -5.35              | 1.77E-03 | ATPase                                             |
| 19263823 | MAA_09537 | XM_007827535.1 | -5.23              | 1.69E-04 | MFS1 family protein                                |
| 19262598 | MAA_08312 | XM_007826310.1 | -5.18              | 1.21E-43 | cell wall protein                                  |
| 19259182 | MAA_04896 | XM_007822992.1 | -5.06              | 3.47E-10 | regulatory P domain-containing protein             |
| 19260861 | MAA_06575 | XM_007824573.1 | -4.95              | 7.68E-04 | Beta-ketoacyl synthase                             |
| 19255257 | MAA_00971 | XM_007818969.2 | -4.81              | 4.46E-02 | Aromatic prenyltransferase, DMATS type             |
| 19264559 | MAA_10273 | XM_007828271.1 | -4.71              | 8.64E-04 | Asparaginase/glutaminase                           |
| 19264560 | MAA_10274 | XM_007828272.1 | -4.58              | 1.41E-03 | TAM domain methyltransferase                       |
| 19259961 | MAA_05675 | XM_007823673.1 | -4.48              | 4.98E-44 | alkaline serine protease P32                       |
| 19262599 | MAA_08313 | XM_007826311.2 | -4.41              | 6.17E-22 | phytanoyl-CoA dioxygenase family protein           |
| 19262115 | MAA_07829 | XM_007825827.2 | -4.38              | 1.12E-11 | WD40 repeat-like-containing domain protein         |
| 19259268 | MAA_04982 | XM_007822493.1 | -4.36              | 3.19E-09 | protein-arginine deiminase type-4                  |
| 23632349 | MAA_10900 | XM_011412846.1 | -4.32              | 9.22E-35 | hypothetical protein MAA_10900                     |
| 19263595 | MAA_09309 | XM_007827307.1 | -4.24              | 2.26E-56 | hypothetical protein MAA_09309                     |
| 19257629 | MAA_03343 | XM_007821341.1 | -4.12              | 7.13E-05 | Gram-positive signal peptide protein, YSIRK family |
| 19255283 | MAA_00997 | XM_007818995.1 | -4.09              | 2.01E-12 | peptidase family M28                               |
| 19255619 | MAA_01333 | XM_007819331.1 | -4.06              | 1.89E-20 | carboxypeptidase, partial                          |
| 23632927 | MAA_11479 | XM_011413473.1 | -4.02              | 3.54E-02 | hypothetical protein MAA_11479                     |
| 23633146 | MAA_11698 | XM_011412613.1 | -3.98              | 4.99E-04 | hypothetical protein MAA_11698                     |
| 23633214 | MAA_11766 | XM_011412804.1 | -3.86              | 1.16E-02 | hypothetical protein MAA_11766                     |
| 19257526 | MAA_03240 | XM_007821238.1 | -3.79              | 2.33E-02 | hypothetical protein MAA_03240                     |
| 23632468 | MAA_11020 | XM_011412965.1 | -3.77              | 2.95E-02 | peptidase S1 domain protein                        |
| 19264332 | MAA_10046 | XM_007828044.2 | -3.68              | 8.84E-39 | Aspartic acid decarboxylase, DtxS4                 |
| 19260466 | MAA_06180 | XM_007824178.2 | -3.64              | 8.90E-09 | peroxidase manganese-dependent 1                   |
| 19257561 | MAA_03275 | XM_007821273.2 | -3.64              | 3.05E-02 | transferase                                        |
| 19262048 | MAA_07762 | XM_007825760.1 | -3.64              | 3.04E-04 | hypothetical protein MAA_07762                     |
| 19263074 | MAA_08788 | XM_007826786.2 | -3.60              | 2.98E-05 | ankyrin repeat-containing protein                  |
| 19262592 | MAA_08306 | XM_007826304.1 | -3.45              | 1.96E-04 | Ankyrin repeat protein                             |
| 19262751 | MAA_08465 | XM_007826463.2 | -3.33              | 1.09E-02 | hypothetical protein MAA_08465                     |
| 19256231 | MAA_01945 | XM_007819943.1 | -3.30              | 1.09E-25 | fungalsin metalloproteinase                        |
| 19262135 | MAA_07849 | XM_007825847.1 | -3.25              | 3.96E-11 | protein-arginine deiminase type-4                  |
| 19264708 | MAA_10422 | XM_007828420.1 | -3.24              | 2.86E-02 | hypothetical protein MAA_10422                     |

|          |           |                |       |          |                                                                  |
|----------|-----------|----------------|-------|----------|------------------------------------------------------------------|
| 19264334 | MAA_10048 | XM_007828046.2 | -3.21 | 7.70E-27 | abc transporter                                                  |
| 19261383 | MAA_07097 | XM_007825095.2 | -3.19 | 5.20E-03 | C2H2 transcription factor                                        |
| 19257889 | MAA_03603 | XM_007821601.1 | -3.18 | 4.47E-25 | PH domain-containing protein                                     |
| 19264333 | MAA_10047 | XM_007828045.2 | -3.17 | 1.21E-25 | V-type ATPase                                                    |
| 19263838 | MAA_09552 | XM_007827550.1 | -3.11 | 2.85E-02 | FAD-binding, type 2                                              |
| 23633156 | MAA_11708 | XM_011412623.1 | -3.09 | 3.15E-04 | hypothetical protein X797_011588                                 |
| 19263878 | MAA_09592 | XM_007827590.1 | -3.08 | 2.12E-25 | Peptidase S1/S6, chymotrypsin/Hap                                |
| 19260495 | MAA_06209 | XM_007824207.1 | -3.07 | 2.13E-10 | Concanavalin A-like lectin/glucanase                             |
| 19255716 | MAA_01430 | XM_007819428.1 | -2.98 | 1.99E-13 | Peptidase A1                                                     |
| 23632897 | MAA_11449 | XM_011413443.1 | -2.96 | 2.28E-17 | Ankyrin repeat-containing domain protein                         |
| 19257630 | MAA_03344 | XM_007821342.1 | -2.92 | 1.61E-02 | ankyrin repeat containing protein                                |
| 19255921 | MAA_01635 | XM_007819633.1 | -2.92 | 3.44E-04 | integral membrane protein pth11                                  |
| 19262278 | MAA_07992 | XM_007825990.1 | -2.83 | 6.79E-16 | proline rich protein 5MeD                                        |
| 19254665 | MAA_00379 | XM_007818377.2 | -2.77 | 2.53E-02 | tlh5                                                             |
| 19263667 | MAA_09381 | XM_007827379.1 | -2.75 | 9.32E-09 | protoporphyrinogen oxidase                                       |
| 19263325 | MAA_09039 | XM_007827037.2 | -2.73 | 4.40E-06 | hydantoinase                                                     |
| 19259842 | MAA_05556 | XM_007823554.1 | -2.72 | 2.47E-03 | potassium/sodium efflux P-type ATPase                            |
| 19264331 | MAA_10045 | XM_007828043.2 | -2.72 | 6.37E-26 | Aldo/keto reductase, DtxS3                                       |
| 19262512 | MAA_08226 | XM_007826224.1 | -2.72 | 2.17E-06 | Peptidase aspartic, active site protein                          |
| 19263782 | MAA_09496 | XM_007827494.1 | -2.70 | 3.60E-07 | hypothetical protein MAA_09496                                   |
| 19263851 | MAA_09565 | XM_007827563.2 | -2.70 | 5.30E-16 | Metallophosphoesterase                                           |
| 19256710 | MAA_02424 | XM_007820422.2 | -2.67 | 1.10E-02 | hypothetical protein X797_000808                                 |
| 23632304 | MAA_10855 | XM_011412774.1 | -2.66 | 1.49E-05 | hypothetical protein MAA_10855                                   |
| 19263200 | MAA_08914 | XM_007826912.1 | -2.62 | 1.14E-02 | VrtL                                                             |
| 19261160 | MAA_06874 | XM_007824872.2 | -2.59 | 2.30E-11 | Necrosis inducing                                                |
| 19264969 | MAA_10685 | XM_011412403.1 | -2.56 | 6.46E-03 | hypothetical protein MAA_10685                                   |
| 19263572 | MAA_09286 | XM_007827284.1 | -2.51 | 8.55E-04 | hypothetical protein MAA_09286                                   |
| 23632924 | MAA_11476 | XM_011413470.1 | -2.51 | 3.28E-02 | hypothetical protein MAA_11476                                   |
| 19262976 | MAA_08690 | XM_007826688.2 | -2.48 | 2.44E-02 | hypothetical protein MAA_08690                                   |
| 19262950 | MAA_08664 | XM_007826662.1 | -2.47 | 6.37E-03 | hypothetical protein MAA_08664                                   |
| 19259811 | MAA_05525 | XM_007823523.1 | -2.46 | 2.67E-07 | endo-1,3(4)-beta-glucanase                                       |
| 19259506 | MAA_05220 | XM_007823218.1 | -2.46 | 1.06E-15 | hypothetical protein MAA_05220                                   |
| 19256036 | MAA_01750 | XM_007819748.1 | -2.42 | 7.05E-08 | bacterial-type extracellular deoxyribonuclease                   |
| 19257223 | MAA_02937 | XM_007820935.1 | -2.41 | 5.67E-05 | hypothetical protein MAA_02937                                   |
| 19257548 | MAA_03262 | XM_007821260.1 | -2.40 | 3.01E-10 | Peptidase S1/S6, chymotrypsin/Hap                                |
| 19262575 | MAA_08289 | XM_007826287.1 | -2.35 | 1.96E-03 | cell surface protein (Mas1)                                      |
| 19257525 | MAA_03239 | XM_007821237.2 | -2.33 | 6.22E-06 | Beta-ketoacyl synthase                                           |
| 19259759 | MAA_05473 | XM_007823471.1 | -2.32 | 7.02E-05 | siderophore iron transporter mirB                                |
| 23632915 | MAA_11467 | XM_011413461.1 | -2.32 | 1.69E-13 | hypothetical protein MAA_11467                                   |
| 19262601 | MAA_08315 | XM_007826313.1 | -2.30 | 1.80E-03 | Glycoside hydrolase, chitinase active site protein               |
| 19261161 | MAA_06875 | XM_007824873.1 | -2.29 | 1.92E-05 | Monooxygenase, FAD-binding protein                               |
| 23633287 | MAA_11839 | XM_011413513.1 | -2.28 | 1.09E-02 | hypothetical protein MAA_11839                                   |
| 19263527 | MAA_09241 | XM_007827239.1 | -2.28 | 2.55E-02 | cysteine-rich secretory protein                                  |
| 19262202 | MAA_07916 | XM_007825914.2 | -2.26 | 2.10E-02 | major facilitator superfamily transporter                        |
| 19263547 | MAA_09261 | XM_007827259.1 | -2.25 | 1.71E-02 | Regulator of G protein signaling superfamily                     |
| 19264800 | MAA_10514 | XM_007828512.1 | -2.24 | 1.16E-03 | hypothetical protein MAA_10514                                   |
| 23632640 | MAA_11192 | XM_011413172.1 | -2.20 | 4.26E-03 | ankyrin repeat protein                                           |
| 19264670 | MAA_10384 | XM_007828382.1 | -2.20 | 2.66E-09 | dynamain family protein                                          |
| 19262060 | MAA_07774 | XM_007825772.2 | -2.19 | 1.16E-02 | ankyrin protein                                                  |
| 19262606 | MAA_08320 | XM_007826318.2 | -2.18 | 9.18E-09 | LAS seventeen-binding protein                                    |
| 19264754 | MAA_10468 | XM_007828466.1 | -2.18 | 1.35E-03 | catalytic protein                                                |
| 19255215 | MAA_00929 | XM_007818927.2 | -2.17 | 3.22E-07 | Ribonuclease H-like protein                                      |
| 19254299 | MAA_00013 | XM_007818011.1 | -2.17 | 2.08E-04 | lipase, class 3                                                  |
| 19263566 | MAA_09280 | XM_007827278.1 | -2.16 | 9.04E-03 | hypothetical protein MAA_09280                                   |
| 19255798 | MAA_01512 | XM_007819510.2 | -2.15 | 1.08E-07 | Cytochrome P450 CYP5148B3                                        |
| 19262357 | MAA_08071 | XM_007826069.1 | -2.14 | 2.61E-05 | hypothetical protein MAA_08071                                   |
| 19256264 | MAA_01978 | XM_007819976.1 | -2.14 | 1.82E-02 | hypothetical protein MAA_01978                                   |
| 19264234 | MAA_09948 | XM_007827946.1 | -2.13 | 3.17E-02 | nitroreductase protein                                           |
| 19261774 | MAA_07488 | XM_007825486.2 | -2.11 | 3.47E-10 | exo-1,3-beta-D-glucanase                                         |
| 19259153 | MAA_04867 | XM_007822963.2 | -2.08 | 1.21E-02 | Pyridine nucleotide-disulfide oxidoreductase, NAD-binding domain |
| 19262411 | MAA_08125 | XM_007826123.1 | -2.05 | 1.80E-02 | hypothetical protein MAA_08125                                   |

|          |           |                |       |          |                                                          |
|----------|-----------|----------------|-------|----------|----------------------------------------------------------|
| 19263916 | MAA_09630 | XM_007827628.1 | -2.03 | 2.15E-21 | alpha-N-acetylgalactosaminidase                          |
| 19261773 | MAA_07487 | XM_007825485.2 | -2.03 | 1.23E-06 | hypothetical protein MAA_07487                           |
| 19259775 | MAA_05489 | XM_007823487.1 | -2.03 | 4.55E-02 | Oxoglutarate/iron-dependent oxygenase                    |
| 19263663 | MAA_09377 | XM_007827375.1 | -2.01 | 1.86E-07 | SPFH domain/Band 7 family protein                        |
| 19262292 | MAA_08006 | XM_007826004.1 | -1.99 | 1.48E-16 | hypothetical protein MAA_08006                           |
| 19259894 | MAA_05608 | XM_007823606.1 | -1.98 | 9.09E-03 | hypothetical protein MAA_05608                           |
| 19254732 | MAA_00446 | XM_007818444.1 | -1.97 | 4.15E-05 | NADPH dehydrogenase                                      |
| 19259729 | MAA_05443 | XM_007823441.1 | -1.96 | 2.64E-07 | siderophore biosynthesis protein                         |
| 19260857 | MAA_06571 | XM_007824569.1 | -1.95 | 2.42E-02 | NAD(P)-binding domain protein                            |
| 19264680 | MAA_10394 | XM_007828392.1 | -1.93 | 4.18E-02 | hypothetical protein MAA_10394                           |
| 19256668 | MAA_02382 | XM_007820380.2 | -1.91 | 3.05E-09 | Oligopeptide transporter OPT superfamily                 |
| 19258919 | MAA_04633 | XM_007822729.2 | -1.90 | 3.25E-02 | hypothetical protein MAA_04633                           |
| 19260674 | MAA_06388 | XM_007824386.2 | -1.90 | 3.36E-12 | Cd2+/Zn2+ transporter protein                            |
| 19258334 | MAA_04048 | XM_007822046.2 | -1.90 | 1.77E-03 | major facilitator superfamily transporter                |
| 19264673 | MAA_10387 | XM_007828385.2 | -1.89 | 4.30E-06 | ZIP Zinc transporter                                     |
| 19261014 | MAA_06728 | XM_007824726.1 | -1.89 | 5.86E-04 | hypothetical protein MAA_06728                           |
| 19264518 | MAA_10232 | XM_007828230.2 | -1.88 | 2.63E-03 | ankyrin repeat containing protein                        |
| 19256072 | MAA_01786 | XM_007819784.2 | -1.88 | 9.29E-05 | hypothetical protein MAA_01786                           |
| 19256824 | MAA_02538 | XM_007820536.1 | -1.87 | 1.16E-06 | hypothetical protein MAA_02538                           |
| 19256825 | MAA_02539 | XM_007820537.1 | -1.86 | 6.22E-06 | cell surface protein (Mas1)                              |
| 19263053 | MAA_08767 | XM_007826765.1 | -1.85 | 3.64E-10 | hypothetical protein MAA_08767                           |
| 19255104 | MAA_00818 | XM_007818816.2 | -1.85 | 2.94E-03 | hypothetical protein X797_004960                         |
| 19261648 | MAA_07362 | XM_007825360.1 | -1.85 | 9.81E-04 | RNA-directed RNA polymerase (Sad-1)                      |
| 19254399 | MAA_00113 | XM_007818111.1 | -1.84 | 3.80E-04 | hypothetical protein MAA_00113                           |
| 19259726 | MAA_05440 | XM_007823438.1 | -1.83 | 7.89E-08 | Phosphate transporter                                    |
| 19257585 | MAA_03299 | XM_007821297.1 | -1.82 | 2.61E-07 | hypothetical protein MAA_03299                           |
| 19257527 | MAA_03241 | XM_007821239.2 | -1.82 | 2.52E-02 | glutamyl-tRNA(Gln) amidotransferase                      |
| 19262022 | MAA_07736 | XM_007825734.1 | -1.81 | 2.66E-02 | Carbohydrate-binding WSC                                 |
| 19261096 | MAA_06810 | XM_007824808.1 | -1.81 | 1.48E-06 | FK506 suppressor Sfk1                                    |
| 19263304 | MAA_09018 | XM_007827016.2 | -1.80 | 1.84E-04 | Glycoside hydrolase, subgroup, catalytic core            |
| 19264330 | MAA_10044 | XM_007828042.2 | -1.78 | 1.10E-19 | Cytochrome P450, DtxS2                                   |
| 19263051 | MAA_08765 | XM_007826763.1 | -1.78 | 7.74E-16 | sugar transporter-like protein                           |
| 19261778 | MAA_07492 | XM_007825490.1 | -1.78 | 3.68E-03 | c6 zinc finger domain containing protein                 |
| 19263736 | MAA_09450 | XM_007827448.1 | -1.76 | 3.24E-06 | proteinrelated to ser/arg-related nuclear matrix protein |
| 19264203 | MAA_09917 | XM_007827915.1 | -1.74 | 2.98E-06 | Cellular retinaldehyde-binding/triple function           |
| 23632201 | MAA_10752 | XM_011412470.1 | -1.74 | 1.15E-02 | triacylglycerol lipase-like protein                      |
| 23633230 | MAA_11782 | XM_011412820.1 | -1.74 | 8.65E-04 | phosphoribosyl transferase domain protein                |
| 19261006 | MAA_06720 | XM_007824718.1 | -1.74 | 2.63E-03 | hypothetical protein MAA_06720                           |
| 23633221 | MAA_11773 | XM_011412811.1 | -1.72 | 1.67E-03 | hypothetical protein MAA_11773                           |
| 23633169 | MAA_11721 | XM_011412636.1 | -1.71 | 1.69E-04 | hypothetical protein MAA_11721                           |
| 19254338 | MAA_00052 | XM_007818050.2 | -1.71 | 1.05E-02 | Nucleoside phosphorylase domain protein                  |
| 19256493 | MAA_02207 | XM_007820205.1 | -1.71 | 5.76E-04 | carbohydrate esterase family 9 protein                   |
| 19256663 | MAA_02377 | XM_007820375.1 | -1.71 | 2.94E-06 | ATP-binding cassette transporter ift1                    |
| 19262987 | MAA_08701 | XM_007826699.1 | -1.69 | 8.60E-07 | subtilisin-like serine protease precursor                |
| 19254288 | MAA_00002 | XM_007818000.1 | -1.67 | 4.37E-05 | hypothetical protein MAA_00002                           |
| 19255591 | MAA_01305 | XM_007819303.2 | -1.67 | 2.01E-09 | hypothetical protein MAA_01305                           |
| 19263800 | MAA_09514 | XM_007827512.2 | -1.67 | 1.82E-03 | Cytochrome P450 CYP58S1                                  |
| 19263052 | MAA_08766 | XM_007826764.1 | -1.67 | 4.03E-11 | maltase                                                  |
| 19254713 | MAA_00427 | XM_007818425.1 | -1.66 | 6.67E-04 | hypothetical protein MAA_00427                           |
| 19263326 | MAA_09040 | XM_007827038.2 | -1.66 | 5.01E-03 | NCS1 nucleoside transporter family protein               |
| 19259418 | MAA_05132 | XM_007823130.1 | -1.66 | 2.26E-03 | NAD(P)-binding protein                                   |
| 23632583 | MAA_11135 | XM_011413101.1 | -1.65 | 1.82E-04 | hypothetical protein X797_004552                         |
| 19255592 | MAA_01306 | XM_007819304.1 | -1.64 | 5.08E-04 | protein kinase-like domain protein                       |
| 19264428 | MAA_10142 | XM_007828140.1 | -1.64 | 9.04E-03 | Zn(2)-C6 fungal-type DNA-binding domain protein          |
| 19264998 | MAA_10714 | XM_011412432.1 | -1.63 | 1.95E-03 | C6 transcription factor                                  |
| 19258271 | MAA_03985 | XM_007821983.2 | -1.63 | 1.17E-03 | hypothetical protein MAA_03985                           |
| 19264281 | MAA_09995 | XM_007827993.1 | -1.63 | 9.51E-07 | major facilitator superfamily transporter                |
| 19255540 | MAA_01254 | XM_007819252.1 | -1.63 | 1.69E-04 | hypothetical protein X797_005849                         |
| 19263305 | MAA_09019 | XM_007827017.1 | -1.62 | 7.26E-04 | tri14-like protein                                       |
| 19263058 | MAA_08772 | XM_007826770.2 | -1.62 | 8.43E-03 | hypothetical protein MAA_08772                           |
| 19255287 | MAA_01001 | XM_007818999.1 | -1.61 | 9.33E-05 | GCN5-related N-acetyltransferase (GNAT) domain protein   |

|          |           |                |       |          |                                                                  |
|----------|-----------|----------------|-------|----------|------------------------------------------------------------------|
| 19257988 | MAA_03702 | XM_007821700.2 | -1.61 | 1.80E-04 | transcription factor RfeG                                        |
| 19261793 | MAA_07507 | XM_007825505.1 | -1.59 | 1.67E-03 | Pyoverdine biosynthesis                                          |
| 19263623 | MAA_09337 | XM_007827335.1 | -1.58 | 8.09E-04 | glyoxalase/bleomycin resistance protein/dioxygenase              |
| 23632692 | MAA_11244 | XM_011413224.1 | -1.58 | 3.22E-07 | hypothetical protein MAA_11244                                   |
| 23632734 | MAA_11286 | XM_011413266.1 | -1.57 | 2.23E-04 | nacht nucleoside triphosphatase                                  |
| 19264674 | MAA_10388 | XM_007828386.1 | -1.57 | 1.07E-05 | Glyoxalase/bleomycin resistance protein/dioxygenase              |
| 19260324 | MAA_06038 | XM_007824036.1 | -1.57 | 2.17E-05 | pH regulatory protein mrPacC                                     |
| 19261285 | MAA_06999 | XM_007824997.1 | -1.56 | 2.04E-03 | major facilitator superfamily transporter                        |
| 19259509 | MAA_05223 | XM_007823221.1 | -1.56 | 5.19E-03 | CAS1 protein                                                     |
| 19262506 | MAA_08220 | XM_007826218.1 | -1.56 | 7.52E-05 | hypothetical protein MAA_08220                                   |
| 19260542 | MAA_06256 | XM_007824254.1 | -1.55 | 1.18E-02 | proteasome-activating nucleotidase                               |
| 19256624 | MAA_02338 | XM_007820336.1 | -1.55 | 9.31E-07 | General substrate transporter                                    |
| 19264597 | MAA_10311 | XM_007828309.1 | -1.55 | 2.93E-03 | Chloroperoxidase                                                 |
| 19255658 | MAA_01372 | XM_007819370.1 | -1.55 | 6.43E-05 | hypothetical protein MBR_09810, partial                          |
| 19254945 | MAA_00659 | XM_007818657.1 | -1.54 | 2.61E-07 | hypothetical protein MAA_00659                                   |
| 19257628 | MAA_03342 | XM_007821340.1 | -1.53 | 2.32E-05 | integral membrane protein                                        |
| 19254343 | MAA_00057 | XM_007818055.2 | -1.53 | 1.21E-04 | choline dehydrogenase                                            |
| 19261230 | MAA_06944 | XM_007824942.1 | -1.53 | 1.00E-03 | UDP-glucose 4-epimerase                                          |
| 19260855 | MAA_06569 | XM_007824567.2 | -1.52 | 1.04E-03 | AMP-dependent synthetase/ligase                                  |
| 19258281 | MAA_03995 | XM_007821993.1 | -1.51 | 3.22E-03 | ThiJ/PfpI family protein                                         |
| 19256453 | MAA_02167 | XM_007820165.2 | -1.51 | 4.03E-02 | Glucoamylase, putative                                           |
| 19264329 | MAA_10043 | XM_007828041.2 | -1.49 | 3.54E-16 | destruxin synthetase, DtxS1                                      |
| 19263759 | MAA_09473 | XM_007827471.2 | -1.48 | 2.04E-06 | DUF1338 domain protein                                           |
| 19255901 | MAA_01615 | XM_007819613.1 | -1.48 | 2.09E-02 | glucose oxidase                                                  |
| 19257557 | MAA_03271 | XM_007821269.1 | -1.47 | 2.24E-03 | flavin-binding monooxygenase                                     |
| 19257582 | MAA_03296 | XM_007821294.1 | -1.47 | 3.64E-10 | hypothetical protein MAA_03296                                   |
| 19255066 | MAA_00780 | XM_007818778.1 | -1.47 | 3.20E-05 | zinc finger protein dhhc domain containing protein               |
| 19255553 | MAA_01267 | XM_007819265.1 | -1.47 | 1.50E-03 | hypothetical protein MAA_01267                                   |
| 19259755 | MAA_05469 | XM_007823467.1 | -1.46 | 7.73E-06 | siderophore iron transporter                                     |
| 19263128 | MAA_08842 | XM_007826840.1 | -1.45 | 2.40E-03 | NAD(P)-binding domain protein                                    |
| 19254740 | MAA_00454 | XM_007818452.1 | -1.44 | 3.00E-04 | Phospholipase C, phosphatidylinositol-specific, X domain protein |
| 23632978 | MAA_11530 | XM_011413525.1 | -1.44 | 6.81E-05 | hypothetical protein X797_011732                                 |
| 23632221 | MAA_10772 | XM_011412691.1 | -1.44 | 3.40E-03 | cyclin-dependent kinase                                          |
| 19256971 | MAA_02685 | XM_007820683.1 | -1.44 | 9.32E-09 | chitinase                                                        |
| 19259713 | MAA_05427 | XM_007823425.2 | -1.43 | 1.63E-03 | LysM domain-containing protein                                   |
| 19258825 | MAA_04539 | XM_007822635.1 | -1.41 | 1.30E-05 | Zn(2)-Cys(6) zinc finger domain protein                          |
| 19263514 | MAA_09228 | XM_007827226.1 | -1.40 | 8.17E-03 | lysozyme                                                         |
| 19256950 | MAA_02664 | XM_007820662.2 | -1.40 | 1.74E-07 | actin filament organization protein App1-like protein            |
| 19255871 | MAA_01585 | XM_007819583.2 | -1.40 | 3.25E-02 | hypothetical protein MAA_01585                                   |
| 19260070 | MAA_05784 | XM_007823782.1 | -1.39 | 1.30E-04 | hypothetical protein MAA_05784                                   |
| 19254364 | MAA_00078 | XM_007818076.2 | -1.39 | 3.94E-02 | FAD dependent monooxygenase                                      |
| 19261013 | MAA_06727 | XM_007824725.1 | -1.39 | 5.97E-10 | duf614 domain containing protein                                 |
| 19264752 | MAA_10466 | XM_007828464.1 | -1.39 | 3.55E-05 | Trimeric LpxA-like protein                                       |
| 19256610 | MAA_02324 | XM_007820322.1 | -1.38 | 1.01E-02 | hypothetical protein MAA_02324                                   |
| 19257586 | MAA_03300 | XM_007821298.1 | -1.37 | 9.95E-08 | Tetratricopeptide repeat protein                                 |
| 19263367 | MAA_09081 | XM_007827079.1 | -1.37 | 3.73E-03 | Rad21/Rec8 like protein                                          |
| 19261981 | MAA_07695 | XM_007825693.1 | -1.37 | 7.26E-04 | mitochondrial chaperone BCS1                                     |
| 19259921 | MAA_05635 | XM_007823633.1 | -1.37 | 3.66E-04 | CsbD-like protein                                                |
| 19264010 | MAA_09724 | XM_007827722.1 | -1.37 | 4.85E-04 | ATPase, P-type, potassium/sodium efflux, fungal                  |
| 19256461 | MAA_02175 | XM_007820173.2 | -1.36 | 1.09E-04 | immunoglobulin I-set domain-containing protein                   |
| 23632740 | MAA_11292 | XM_011413272.1 | -1.36 | 1.49E-03 | hypothetical protein MAA_11292                                   |
| 19261227 | MAA_06941 | XM_007824939.1 | -1.35 | 6.29E-03 | extracellular serine-rich protein                                |
| 19262660 | MAA_08374 | XM_007826372.2 | -1.34 | 9.35E-03 | ankyrin repeat protein                                           |
| 19261596 | MAA_07310 | XM_007825308.2 | -1.34 | 5.44E-04 | integral membrane family protein                                 |
| 19264499 | MAA_10213 | XM_007828211.1 | -1.34 | 1.72E-02 | Cytochrome P450 CYP5317A1                                        |
| 23632695 | MAA_11247 | XM_011413227.1 | -1.34 | 2.10E-02 | hypothetical protein MAA_11247                                   |
| 19261280 | MAA_06994 | XM_007824992.1 | -1.33 | 6.14E-04 | secretory lipase                                                 |
| 19257069 | MAA_02783 | XM_007820781.1 | -1.32 | 4.76E-05 | mucoidy inhibitor A                                              |
| 19255482 | MAA_01196 | XM_007819194.1 | -1.32 | 2.84E-08 | cysteine-rich secreted protein                                   |
| 19262758 | MAA_08472 | XM_007826470.1 | -1.32 | 1.04E-02 | Glycerate kinase                                                 |
| 19260050 | MAA_05764 | XM_007823762.1 | -1.31 | 4.61E-04 | ThiJ/PfpI                                                        |

|          |           |                |       |          |                                                        |
|----------|-----------|----------------|-------|----------|--------------------------------------------------------|
| 19262103 | MAA_07817 | XM_007825815.1 | -1.31 | 4.09E-04 | glycoside hydrolase family 76 protein                  |
| 19260235 | MAA_05949 | XM_007823947.1 | -1.31 | 3.63E-07 | cation transporter                                     |
| 19259756 | MAA_05470 | XM_007823468.2 | -1.30 | 3.09E-02 | transferase family protein                             |
| 19263703 | MAA_09417 | XM_007827415.1 | -1.30 | 1.85E-06 | oligopeptide transporter                               |
| 19254593 | MAA_00307 | XM_007818305.2 | -1.30 | 1.74E-04 | siderophore iron transporter                           |
| 19257345 | MAA_03059 | XM_007821057.2 | -1.29 | 9.90E-03 | meiotically up-regulated 65 protein                    |
| 19262044 | MAA_07758 | XM_007825756.1 | -1.29 | 2.85E-04 | coagulation factor 5/8 type domain protein             |
| 19259139 | MAA_04853 | XM_007822949.1 | -1.28 | 1.51E-03 | hypothetical protein MAA_04853                         |
| 19254294 | MAA_00008 | XM_007818006.1 | -1.27 | 9.32E-03 | Alpha-L-arabinofuranosidase B, catalytic               |
| 19254962 | MAA_00676 | XM_007818674.1 | -1.27 | 6.26E-08 | hypothetical protein MAA_00676                         |
| 19261242 | MAA_06956 | XM_007824954.1 | -1.26 | 7.23E-03 | hypothetical protein MAA_06956                         |
| 19256488 | MAA_02202 | XM_007820200.2 | -1.26 | 1.95E-08 | zinc finger protein 58                                 |
| 19259306 | MAA_05020 | XM_007822531.2 | -1.25 | 2.25E-06 | phospholipase-like protein                             |
| 19259557 | MAA_05271 | XM_007823269.1 | -1.24 | 1.03E-07 | nicotinamide N-methyltransferase                       |
| 19261083 | MAA_06797 | XM_007824795.1 | -1.24 | 1.80E-07 | peptidase family M28                                   |
| 19256497 | MAA_02211 | XM_007820209.1 | -1.24 | 5.28E-04 | hexokinase-1                                           |
| 19262418 | MAA_08132 | XM_007826130.1 | -1.24 | 3.83E-03 | hypothetical protein MAA_08132                         |
| 19258721 | MAA_04435 | XM_007822433.1 | -1.23 | 7.82E-04 | Salicylate synthase                                    |
| 19258291 | MAA_04005 | XM_007822003.1 | -1.23 | 6.33E-06 | Endopolyphosphatase, Ppn1p-related protein             |
| 19257316 | MAA_03030 | XM_007821028.1 | -1.22 | 5.83E-04 | hypothetical protein MAA_03030                         |
| 19264231 | MAA_09945 | XM_007827943.1 | -1.22 | 2.95E-02 | c6 zinc finger domain containing protein               |
| 19254739 | MAA_00453 | XM_007818451.1 | -1.22 | 3.61E-04 | Ribonuclease T2, active site protein                   |
| 19260913 | MAA_06627 | XM_007824625.1 | -1.22 | 4.96E-04 | hypothetical protein MAA_06627                         |
| 19256757 | MAA_02471 | XM_007820469.1 | -1.22 | 1.18E-05 | phosducin                                              |
| 19255336 | MAA_01050 | XM_007819048.1 | -1.22 | 5.78E-05 | hypothetical protein MAA_01050                         |
| 19257739 | MAA_03453 | XM_007821451.2 | -1.21 | 2.18E-05 | fungal specific transcription factor                   |
| 19263892 | MAA_09606 | XM_007827604.2 | -1.21 | 1.05E-02 | FAD binding domain-containing protein                  |
| 19263922 | MAA_09636 | XM_007827634.1 | -1.21 | 3.14E-04 | subtilisin-like protease                               |
| 19257115 | MAA_02829 | XM_007820827.2 | -1.20 | 5.70E-09 | pali-domain-containing protein                         |
| 19255487 | MAA_01201 | XM_007819199.1 | -1.20 | 1.16E-03 | Ctr copper transporter                                 |
| 19263958 | MAA_09672 | XM_007827670.2 | -1.20 | 7.73E-06 | WD domain-containing protein                           |
| 19258805 | MAA_04519 | XM_007822615.2 | -1.19 | 6.82E-03 | caspase domain-containing protein                      |
| 19259548 | MAA_05262 | XM_007823260.1 | -1.19 | 1.28E-04 | Mitochondrial substrate/solute carrier                 |
| 19255970 | MAA_01684 | XM_007819682.1 | -1.19 | 2.99E-04 | Leucine Rich Repeat domain protein                     |
| 19263848 | MAA_09562 | XM_007827560.1 | -1.18 | 2.15E-02 | fatty acid hydroxylase superfamily protein             |
| 19261382 | MAA_07096 | XM_007825094.2 | -1.18 | 1.29E-02 | hypothetical protein MAA_07096                         |
| 19255800 | MAA_01514 | XM_007819512.1 | -1.18 | 5.15E-06 | Peptidase A1                                           |
| 19257045 | MAA_02759 | XM_007820757.2 | -1.18 | 3.29E-06 | Ca2+ permeable channel                                 |
| 19258127 | MAA_03841 | XM_007821839.1 | -1.18 | 1.22E-02 | Cytochrome P450 CYP6003A1                              |
| 19265003 | MAA_10719 | XM_011412437.1 | -1.18 | 6.89E-07 | YTH domain protein                                     |
| 19255236 | MAA_00950 | XM_007818948.1 | -1.17 | 2.46E-08 | hypothetical protein MAA_00950                         |
| 19259920 | MAA_05634 | XM_007823632.1 | -1.17 | 9.95E-04 | Src like protein                                       |
| 19261351 | MAA_07065 | XM_007825063.2 | -1.17 | 4.09E-02 | hypothetical protein MAA_07065                         |
| 19257265 | MAA_02979 | XM_007820977.1 | -1.17 | 1.25E-06 | hypothetical protein MANI_024329                       |
| 19264076 | MAA_09790 | XM_007827788.1 | -1.16 | 1.26E-02 | hypothetical protein MAA_09790                         |
| 19258535 | MAA_04249 | XM_007822247.2 | -1.16 | 1.25E-02 | methyltransferase                                      |
| 19258280 | MAA_03994 | XM_007821992.1 | -1.15 | 2.65E-02 | glycosyl transferase GT-A type structural fold protein |
| 19258514 | MAA_04228 | XM_007822226.1 | -1.15 | 1.37E-05 | phospho-2-dehydro-3-deoxyheptonate aldolase            |
| 19262192 | MAA_07906 | XM_007825904.1 | -1.15 | 7.18E-03 | Alpha-hydroxy acid dehydrogenase, FMN-dependent        |
| 23632203 | MAA_10754 | XM_011412472.1 | -1.15 | 3.66E-02 | gag-pol polyprotein                                    |
| 19257842 | MAA_03556 | XM_007821554.1 | -1.15 | 5.85E-04 | hypothetical protein H634G_07741                       |
| 19255594 | MAA_01308 | XM_007819306.2 | -1.14 | 8.18E-06 | Peptidase S8/S53, subtilisin/kexin/sedolisin           |
| 19259541 | MAA_05255 | XM_007823253.2 | -1.14 | 4.18E-02 | isopenicillin N synthase-like protein                  |
| 19261293 | MAA_07007 | XM_007825005.2 | -1.14 | 3.89E-04 | alkaline phosphatase-like protein                      |
| 19255473 | MAA_01187 | XM_007819185.1 | -1.13 | 3.78E-06 | DUF2205 domain protein                                 |
| 19257577 | MAA_03291 | XM_007821289.1 | -1.13 | 7.12E-04 | Zn(2)-C6 fungal-type DNA-binding domain protein        |
| 19263485 | MAA_09199 | XM_007827197.1 | -1.12 | 4.92E-04 | ATP-dependent RNA helicase DED1                        |
| 19264476 | MAA_10190 | XM_007828188.1 | -1.12 | 4.60E-03 | Heterokaryon incompatibility                           |
| 19263310 | MAA_09024 | XM_007827022.1 | -1.11 | 3.77E-03 | selenium-binding protein                               |
| 23632752 | MAA_11304 | XM_011413292.1 | -1.11 | 4.03E-02 | maleylacetate reductase                                |
| 19260910 | MAA_06624 | XM_007824622.2 | -1.11 | 1.85E-02 | lysophospholipase precursor                            |



|          |           |                |       |          |                                                                     |
|----------|-----------|----------------|-------|----------|---------------------------------------------------------------------|
| 19254358 | MAA_00072 | XM_007818070.1 | -1.10 | 2.40E-03 | hypothetical protein MAA_00072                                      |
| 19254417 | MAA_00131 | XM_007818129.1 | -1.10 | 3.31E-04 | hypothetical protein MAA_00131                                      |
| 19263684 | MAA_09398 | XM_007827396.1 | -1.10 | 5.56E-03 | Ankyrin repeat protein                                              |
| 19261473 | MAA_07187 | XM_007825185.1 | -1.09 | 1.24E-11 | expression library immunization antigen 1                           |
| 19262532 | MAA_08246 | XM_007826244.1 | -1.09 | 1.42E-04 | ankyrin repeat domain containing protein                            |
| 19262380 | MAA_08094 | XM_007826092.1 | -1.09 | 1.57E-04 | hypothetical protein MAA_08094                                      |
| 19264416 | MAA_10130 | XM_007828128.2 | -1.09 | 1.29E-02 | Major facilitator superfamily domain, general substrate transporter |
| 19260886 | MAA_06600 | XM_007824598.2 | -1.09 | 1.68E-02 | hypothetical protein MAA_06600                                      |
| 19254534 | MAA_00248 | XM_007818246.1 | -1.09 | 1.17E-02 | HMG (high mobility group) box protein                               |
| 19262271 | MAA_07985 | XM_007825983.1 | -1.09 | 8.81E-03 | carboxylesterase/lipase domain protein                              |
| 19259102 | MAA_04816 | XM_007822912.1 | -1.08 | 1.97E-07 | cation transporting ATPase                                          |
| 19257500 | MAA_03214 | XM_007821212.1 | -1.08 | 2.47E-05 | Amino acid transporter, transmembrane                               |
| 19263655 | MAA_09369 | XM_007827367.1 | -1.08 | 4.74E-02 | hypothetical protein MAA_09369                                      |
| 19263915 | MAA_09629 | XM_007827627.1 | -1.08 | 1.42E-06 | Glycoside hydrolase, family 35                                      |
| 19261772 | MAA_07486 | XM_007825484.2 | -1.07 | 3.66E-02 | CFEM domain protein                                                 |
| 19261097 | MAA_06811 | XM_007824809.1 | -1.07 | 1.11E-03 | hypothetical protein H634G_06914                                    |
| 19255698 | MAA_01412 | XM_007819410.2 | -1.06 | 5.14E-04 | Ankyrin repeat-containing domain protein                            |
| 19255138 | MAA_00852 | XM_007818850.2 | -1.06 | 1.30E-02 | swim zinc finger domain protein                                     |
| 19256697 | MAA_02411 | XM_007820409.2 | -1.06 | 8.20E-03 | alpha glucoside transporter                                         |
| 19260351 | MAA_06065 | XM_007824063.1 | -1.06 | 2.47E-02 | Basic-leucine zipper (bZIP) transcription factor                    |
| 19260432 | MAA_06146 | XM_007824144.2 | -1.06 | 6.92E-10 | glycoside hydrolase family 3 protein                                |
| 19256409 | MAA_02123 | XM_007820121.1 | -1.06 | 6.71E-09 | WW domain-binding protein                                           |
| 19263194 | MAA_08908 | XM_007826906.1 | -1.06 | 2.85E-04 | FHA domain containing protein                                       |
| 19260803 | MAA_06517 | XM_007824515.1 | -1.05 | 1.43E-02 | protein pyrABCN                                                     |
| 19261231 | MAA_06945 | XM_007824943.2 | -1.05 | 1.23E-03 | glycosyltransferase family 4 protein                                |
| 19256410 | MAA_02124 | XM_007820122.1 | -1.05 | 1.56E-09 | menaquinone methyltransferase related to dlpA protein               |
| 19260619 | MAA_06333 | XM_007824331.2 | -1.05 | 1.43E-02 | AAA family ATPase                                                   |
| 19264348 | MAA_10062 | XM_007828060.1 | -1.05 | 6.05E-03 | polypeptide                                                         |
| 19256077 | MAA_01791 | XM_007819789.1 | -1.05 | 2.89E-02 | Major facilitator superfamily domain protein                        |
| 19262933 | MAA_08647 | XM_007826645.2 | -1.04 | 4.51E-02 | hypothetical protein MAA_08647                                      |
| 19261509 | MAA_07223 | XM_007825221.1 | -1.04 | 6.51E-04 | hypothetical protein MAA_07223                                      |
| 23632275 | MAA_10826 | XM_011412745.1 | -1.04 | 9.24E-03 | meiotic recombination protein DMC1                                  |
| 19260739 | MAA_06453 | XM_007824451.1 | -1.04 | 2.93E-03 | GCN5-related N-acetyltransferase (GNAT) domain protein              |
| 19262238 | MAA_07952 | XM_007825950.1 | -1.03 | 2.26E-02 | Glycosyl transferase, family 25                                     |
| 19259442 | MAA_05156 | XM_007823154.1 | -1.03 | 9.85E-04 | hypothetical protein H634G_04326                                    |
| 19262454 | MAA_08168 | XM_007826166.2 | -1.03 | 8.43E-03 | Peptidase S8, subtilisin-related protein                            |
| 23632270 | MAA_10821 | XM_011412740.1 | -1.03 | 5.64E-03 | ubiquitin-conjugating enzyme                                        |
| 19262129 | MAA_07843 | XM_007825841.1 | -1.02 | 6.49E-03 | patatin-like phospholipase                                          |
| 23632739 | MAA_11291 | XM_011413271.1 | -1.02 | 6.47E-03 | hypothetical protein MAA_11291                                      |
| 19258332 | MAA_04046 | XM_007822044.1 | -1.02 | 1.34E-02 | RNA recognition motif domain protein                                |
| 19256214 | MAA_01928 | XM_007819926.1 | -1.02 | 4.42E-02 | Ubiquitin 3 binding protein But2                                    |
| 19255636 | MAA_01350 | XM_007819348.2 | -1.02 | 1.05E-02 | general substrate transporter                                       |
| 19255412 | MAA_01126 | XM_007819124.1 | -1.02 | 4.99E-04 | Alpha/beta hydrolase fold-3                                         |
| 19255071 | MAA_00785 | XM_007818783.1 | -1.02 | 1.29E-04 | annexin ANXC4                                                       |
| 19264538 | MAA_10252 | XM_007828250.1 | -1.02 | 3.72E-04 | magnesium-translocating P-type ATPase                               |
| 19259926 | MAA_05640 | XM_007823638.1 | -1.01 | 1.03E-02 | aldo-keto reductase family protein                                  |
| 19261480 | MAA_07194 | XM_007825192.1 | -1.01 | 6.88E-06 | hypothetical protein MAA_07194                                      |
| 19263306 | MAA_09020 | XM_007827018.1 | -1.01 | 1.16E-02 | hypothetical protein MAA_09020                                      |
| 19258202 | MAA_03916 | XM_007821914.2 | -1.00 | 4.09E-02 | proliferating cell nuclear antigen                                  |
| 19258435 | MAA_04149 | XM_007822147.1 | -1.00 | 2.25E-03 | Armadillo-type fold protein                                         |
| 19260940 | MAA_06654 | XM_007824652.1 | -1.00 | 2.57E-11 | ferrioxamine B transporter                                          |
| 19264829 | MAA_10543 | XM_007828541.1 | 1.00  | 4.85E-13 | aminoglycoside 3'-phosphotransferase/choline kinase domain protein  |
| 19261806 | MAA_07520 | XM_007825518.2 | 1.00  | 2.23E-03 | major facilitator superfamily transporter                           |
| 23632363 | MAA_10914 | XM_011412860.1 | 1.00  | 1.58E-02 | pol-like protein                                                    |
| 19263400 | MAA_09114 | XM_007827112.2 | 1.01  | 5.60E-05 | Ribonuclease H-like protein                                         |
| 19255584 | MAA_01298 | XM_007819296.1 | 1.01  | 1.81E-02 | O-methyltransferase                                                 |
| 19262654 | MAA_08368 | XM_007826366.2 | 1.01  | 1.85E-04 | major facilitator superfamily transporter                           |
| 19264801 | MAA_10515 | XM_007828513.1 | 1.01  | 4.57E-04 | Metallopeptidase, catalytic domain protein                          |
| 23633182 | MAA_11734 | XM_011412649.1 | 1.01  | 2.00E-08 | hypothetical protein MAA_11734                                      |
| 19264830 | MAA_10544 | XM_007828542.1 | 1.01  | 6.37E-12 | Protein kinase, ATP binding site                                    |
| 19261146 | MAA_06860 | XM_007824858.2 | 1.01  | 1.11E-03 | F-box domain protein                                                |

|          |           |                |      |          |                                                   |
|----------|-----------|----------------|------|----------|---------------------------------------------------|
| 19263397 | MAA_09111 | XM_007827109.1 | 1.01 | 1.87E-04 | NUDIX hydrolase domain protein                    |
| 19258353 | MAA_04067 | XM_007822065.1 | 1.02 | 1.51E-06 | dipeptidyl peptidase                              |
| 19263535 | MAA_09249 | XM_007827247.1 | 1.02 | 5.86E-03 | beta-lactamase                                    |
| 19260841 | MAA_06555 | XM_007824553.1 | 1.02 | 2.03E-03 | methyltransferase                                 |
| 23633238 | MAA_11790 | XM_011412978.1 | 1.02 | 1.80E-03 | Zn(2)-Cys(6) zinc finger domain protein, partial  |
| 19264018 | MAA_09732 | XM_007827730.1 | 1.02 | 4.44E-03 | Aldo/keto reductase                               |
| 19263316 | MAA_09030 | XM_007827028.1 | 1.02 | 1.81E-02 | Sodium/solute symporter                           |
| 19263890 | MAA_09604 | XM_007827602.1 | 1.02 | 1.02E-03 | Ig domain protein group 2 domain protein          |
| 19263221 | MAA_08935 | XM_007826933.1 | 1.04 | 5.88E-04 | Killer toxin, Kp4/SMK-like, core                  |
| 19264907 | MAA_10621 | XM_011412339.1 | 1.04 | 1.64E-02 | MYB DNA-binding domain-containing protein         |
| 23632362 | MAA_10913 | XM_011412859.1 | 1.04 | 2.43E-08 | hypothetical protein MAA_10913                    |
| 19263417 | MAA_09131 | XM_007827129.1 | 1.04 | 7.14E-06 | zinc finger domain-containing protein             |
| 19262889 | MAA_08603 | XM_007826601.2 | 1.04 | 4.53E-06 | transcription factor Cys6                         |
| 19264584 | MAA_10298 | XM_007828296.1 | 1.04 | 2.25E-02 | hydrophobin                                       |
| 23633286 | MAA_11838 | XM_011413366.1 | 1.04 | 5.78E-05 | Ankyrin repeat-containing domain protein          |
| 23633159 | MAA_11711 | XM_011412626.1 | 1.04 | 1.09E-03 | zinc finger domain-containing protein             |
| 19263978 | MAA_09692 | XM_007827690.1 | 1.04 | 1.29E-03 | Oxoglutarate/iron-dependent oxygenase             |
| 19256915 | MAA_02629 | XM_007820627.1 | 1.05 | 6.12E-03 | Alcohol dehydrogenase superfamily, zinc-type      |
| 19263391 | MAA_09105 | XM_007827103.2 | 1.06 | 2.11E-07 | hypothetical protein MAA_09105                    |
| 19262673 | MAA_08387 | XM_007826385.1 | 1.06 | 8.09E-04 | short-chain dehydrogenase                         |
| 19262471 | MAA_08185 | XM_007826183.1 | 1.06 | 5.37E-04 | LEA domain protein                                |
| 19255186 | MAA_00900 | XM_007818898.1 | 1.06 | 5.32E-04 | hypothetical protein MAA_00900                    |
| 19255677 | MAA_01391 | XM_007819389.1 | 1.06 | 1.23E-04 | transposase                                       |
| 23632365 | MAA_10916 | XM_011412862.1 | 1.06 | 1.38E-02 | Ribonuclease H-like protein                       |
| 23633205 | MAA_11757 | XM_011412672.1 | 1.07 | 3.14E-04 | hypothetical protein MAA_11757                    |
| 19259242 | MAA_04956 | XM_007822467.1 | 1.07 | 2.14E-05 | Amine oxidase                                     |
| 19255392 | MAA_01106 | XM_007819104.2 | 1.07 | 1.30E-08 | Ubiquitin supergroup                              |
| 19262964 | MAA_08678 | XM_007826676.1 | 1.07 | 2.87E-02 | hypothetical protein MAA_08678                    |
| 23632906 | MAA_11458 | XM_011413452.1 | 1.07 | 4.41E-06 | hypothetical protein MAA_11458                    |
| 19258249 | MAA_03963 | XM_007821961.1 | 1.08 | 1.16E-03 | hypothetical protein MAA_03963                    |
| 23633141 | MAA_11693 | XM_011412608.1 | 1.08 | 9.84E-06 | hypothetical protein MAA_11693                    |
| 23632274 | MAA_10825 | XM_011412744.1 | 1.08 | 2.85E-06 | hypothetical protein MAA_10825                    |
| 23633175 | MAA_11727 | XM_011412642.1 | 1.08 | 6.20E-15 | FluG domain-containing protein                    |
| 19257788 | MAA_03502 | XM_007821500.1 | 1.09 | 3.58E-03 | zeta toxin family protein                         |
| 19262692 | MAA_08406 | XM_007826404.1 | 1.10 | 1.22E-03 | glycoside hydrolase family 16                     |
| 19263390 | MAA_09104 | XM_007827102.2 | 1.10 | 1.93E-10 | aaa ATPase                                        |
| 23633188 | MAA_11740 | XM_011412655.1 | 1.10 | 3.74E-14 | Zn(2)-C6 fungal-type DNA-binding domain protein   |
| 19255688 | MAA_01402 | XM_007819400.1 | 1.10 | 5.35E-07 | hypothetical protein MAA_01402                    |
| 23633179 | MAA_11731 | XM_011412646.1 | 1.11 | 2.50E-15 | hypothetical protein MAA_11731                    |
| 23633142 | MAA_11694 | XM_011412609.1 | 1.11 | 9.35E-16 | hypothetical protein MAA_11694                    |
| 19256318 | MAA_02032 | XM_007820030.2 | 1.11 | 8.43E-03 | 3-phytase                                         |
| 19255772 | MAA_01486 | XM_007819484.1 | 1.11 | 4.18E-04 | serine carboxypeptidase                           |
| 19254667 | MAA_00381 | XM_007818379.2 | 1.11 | 1.81E-02 | Ribonuclease H-like protein                       |
| 19256665 | MAA_02379 | XM_007820377.2 | 1.12 | 2.77E-03 | Aromatic-ring hydroxylase-like protein            |
| 19263423 | MAA_09137 | XM_007827135.1 | 1.12 | 1.03E-13 | Protein kinase-like protein                       |
| 19264721 | MAA_10435 | XM_007828433.2 | 1.12 | 9.32E-05 | sulfite oxidase                                   |
| 19259511 | MAA_05225 | XM_007823223.2 | 1.12 | 1.74E-03 | extracellular dipeptidyl-peptidase Dpp4           |
| 19259248 | MAA_04962 | XM_007822473.1 | 1.12 | 3.00E-04 | aldehyde dehydrogenase                            |
| 19263392 | MAA_09106 | XM_007827104.1 | 1.12 | 4.82E-14 | FluG domain-containing protein                    |
| 19258466 | MAA_04180 | XM_007822178.2 | 1.12 | 1.50E-02 | TfdA family Taurine catabolism dioxygenase TauD   |
| 19264293 | MAA_10007 | XM_007828005.1 | 1.13 | 9.03E-04 | WD40 repeat-like-containing domain protein        |
| 19263219 | MAA_08933 | XM_007826931.1 | 1.13 | 8.38E-04 | Killer toxin, Kp4/SMK-like, core                  |
| 19264434 | MAA_10148 | XM_007828146.2 | 1.13 | 4.59E-03 | ATP-dependent DNA helicase PIF1                   |
| 19262824 | MAA_08538 | XM_007826536.2 | 1.13 | 1.12E-02 | 3-hydroxyacid dehydrogenase/reductase             |
| 19258184 | MAA_03898 | XM_007821896.2 | 1.14 | 1.71E-02 | long-chain-fatty-acid-CoA ligase                  |
| 23632224 | MAA_10775 | XM_011412694.1 | 1.14 | 3.04E-02 | hypothetical protein MAA_10775                    |
| 19255889 | MAA_01603 | XM_007819601.2 | 1.14 | 9.06E-10 | hypothetical protein MAA_01603                    |
| 19264450 | MAA_10164 | XM_007828162.2 | 1.14 | 7.77E-09 | reverse transcriptase, RNaseH                     |
| 19263386 | MAA_09100 | XM_007827098.2 | 1.14 | 4.04E-07 | DDE superfamily endonuclease, CENP-B-like protein |
| 19257778 | MAA_03492 | XM_007821490.2 | 1.14 | 2.03E-05 | feruloyl esterase B                               |
| 19262472 | MAA_08186 | XM_007826184.1 | 1.14 | 4.55E-02 | late embryogenesis abundant protein               |

|          |           |                |      |          |                                                             |
|----------|-----------|----------------|------|----------|-------------------------------------------------------------|
| 19258564 | MAA_04278 | XM_007822276.1 | 1.15 | 2.04E-02 | hypothetical protein MAA_04278                              |
| 19264062 | MAA_09776 | XM_007827774.1 | 1.15 | 1.46E-05 | lysine amidinotransferase                                   |
| 19254683 | MAA_00397 | XM_007818395.1 | 1.15 | 2.17E-03 | Protein kinase-like protein                                 |
| 19264024 | MAA_09738 | XM_007827736.1 | 1.15 | 1.04E-05 | ThiJ/PfpI family protein                                    |
| 19263888 | MAA_09602 | XM_007827600.1 | 1.16 | 3.44E-03 | Six-hairpin glycosidase                                     |
| 19263266 | MAA_08980 | XM_007826978.1 | 1.16 | 3.06E-03 | Cyanovirin-N                                                |
| 19255217 | MAA_00931 | XM_007818929.1 | 1.16 | 5.94E-12 | Ribonuclease H-like protein                                 |
| 19263403 | MAA_09117 | XM_007827115.1 | 1.17 | 5.37E-10 | hypothetical protein MAA_09117                              |
| 19263692 | MAA_09406 | XM_007827404.1 | 1.17 | 2.94E-06 | hypothetical protein MAA_09406                              |
| 19263977 | MAA_09691 | XM_007827689.1 | 1.17 | 1.15E-03 | 1-aminocyclopropane-1-carboxylate synthase                  |
| 19264826 | MAA_10540 | XM_007828538.1 | 1.17 | 5.62E-03 | hypothetical protein MAA_10540                              |
| 19263358 | MAA_09072 | XM_007827070.1 | 1.17 | 1.39E-02 | cell wall galactomannoprotein Mp2/allergen F17-like protein |
| 23633132 | MAA_11684 | XM_011412599.1 | 1.18 | 1.82E-07 | hypothetical protein MAA_11684                              |
| 19260840 | MAA_06554 | XM_007824552.2 | 1.19 | 2.58E-13 | delta-12 fatty acid desaturase                              |
| 19260584 | MAA_06298 | XM_007824296.2 | 1.19 | 1.72E-04 | MFS transporter [Metarhizium robertsii]                     |
| 19263497 | MAA_09211 | XM_007827209.1 | 1.19 | 1.75E-04 | hypothetical protein MAA_09211                              |
| 19257789 | MAA_03503 | XM_007821501.2 | 1.19 | 4.93E-03 | Protein kinase-like protein                                 |
| 23633172 | MAA_11724 | XM_011412639.1 | 1.20 | 4.76E-04 | Short-chain dehydrogenase/reductase SDR                     |
| 19264446 | MAA_10160 | XM_007828158.2 | 1.20 | 8.86E-16 | transposase-like protein                                    |
| 19264772 | MAA_10486 | XM_007828484.1 | 1.20 | 2.14E-02 | gamma-glutamyltranspeptidase periplasmic precursor          |
| 19260689 | MAA_06403 | XM_007824401.1 | 1.21 | 9.41E-06 | glycoside hydrolase family 76 protein                       |
| 19256359 | MAA_02073 | XM_007820071.1 | 1.21 | 6.62E-07 | nuclear membrane fusion protein Kar5                        |
| 19263164 | MAA_08878 | XM_007826876.2 | 1.21 | 1.29E-05 | hypothetical protein MAA_08878                              |
| 19255177 | MAA_00891 | XM_007818889.1 | 1.21 | 5.50E-03 | hypothetical protein X797_011528                            |
| 19264141 | MAA_09855 | XM_007827853.1 | 1.22 | 8.66E-04 | 4-hydroxyphenylpyruvate dioxygenase                         |
| 23632510 | MAA_11062 | XM_011413028.1 | 1.22 | 2.47E-02 | secretory phospholipase A2                                  |
| 19258471 | MAA_04185 | XM_007822183.1 | 1.22 | 2.60E-03 | G-protein coupled receptor                                  |
| 19259142 | MAA_04856 | XM_007822952.1 | 1.23 | 4.47E-03 | DUF323 domain protein                                       |
| 19259110 | MAA_04824 | XM_007822920.2 | 1.23 | 8.58E-09 | non-ribosomal peptide synthetase                            |
| 19263396 | MAA_09110 | XM_007827108.1 | 1.23 | 3.40E-11 | uracil phosphoribosyltransferase                            |
| 19264834 | MAA_10548 | XM_007828546.1 | 1.23 | 3.44E-04 | ATP-dependent DNA helicase PIF1                             |
| 19264818 | MAA_10532 | XM_007828530.1 | 1.23 | 2.06E-02 | peptidase family M3                                         |
| 19263320 | MAA_09034 | XM_007827032.1 | 1.24 | 4.66E-03 | L-xylulose reductase                                        |
| 19264445 | MAA_10159 | XM_007828157.1 | 1.24 | 5.66E-08 | restless-like transposase                                   |
| 19255187 | MAA_00901 | XM_007818899.2 | 1.24 | 1.44E-09 | hypothetical protein MAA_00901                              |
| 19259838 | MAA_05552 | XM_007823550.1 | 1.24 | 7.29E-03 | ribosomal protein L1                                        |
| 19257096 | MAA_02810 | XM_007820808.2 | 1.24 | 2.14E-03 | Fungal chitosanase                                          |
| 19260842 | MAA_06556 | XM_007824554.1 | 1.25 | 2.01E-12 | Glutathione S-transferase                                   |
| 23633173 | MAA_11725 | XM_011412640.1 | 1.25 | 5.45E-04 | Metallopeptidase, catalytic domain protein                  |
| 19264954 | MAA_10670 | XM_011412388.1 | 1.26 | 2.10E-02 | hypothetical protein MAA_10670                              |
| 19264758 | MAA_10472 | XM_007828470.1 | 1.26 | 3.11E-09 | gag-pol polyprotein                                         |
| 19261561 | MAA_07275 | XM_007825273.1 | 1.26 | 5.53E-10 | hypothetical protein X797_006137                            |
| 23632299 | MAA_10850 | XM_011412769.1 | 1.27 | 2.33E-05 | hypothetical protein MAA_10850                              |
| 19255997 | MAA_01711 | XM_007819709.2 | 1.27 | 8.68E-03 | Beta-lactamase-like protein                                 |
| 19258830 | MAA_04544 | XM_007822640.2 | 1.27 | 2.15E-02 | hypothetical protein MAA_04544                              |
| 23633252 | MAA_11804 | XM_011412992.1 | 1.28 | 1.29E-02 | hypothetical protein X797_012022                            |
| 19264635 | MAA_10349 | XM_007828347.1 | 1.28 | 6.35E-16 | ATP-dependent DNA helicase PIF1                             |
| 19254778 | MAA_00492 | XM_007818490.1 | 1.28 | 1.05E-11 | subtilisin-like protease                                    |
| 19263218 | MAA_08932 | XM_007826930.1 | 1.29 | 2.56E-05 | hypothetical protein MAA_08932                              |
| 19260869 | MAA_06583 | XM_007824581.2 | 1.29 | 5.66E-08 | feruloyl esterase B                                         |
| 19257077 | MAA_02791 | XM_007820789.1 | 1.29 | 1.75E-07 | Glutathione S-transferase/chloride channel                  |
| 23633184 | MAA_11736 | XM_011412651.1 | 1.30 | 9.22E-04 | patatin-like phospholipase                                  |
| 23632921 | MAA_11473 | XM_011413467.1 | 1.30 | 2.14E-03 | Ankyrin repeat-containing domain protein                    |
| 19259936 | MAA_05650 | XM_007823648.1 | 1.30 | 3.82E-02 | MFS transporter                                             |
| 19263628 | MAA_09342 | XM_007827340.1 | 1.31 | 4.42E-02 | carbohydrate-binding module family 13 protein               |
| 19263169 | MAA_08883 | XM_007826881.1 | 1.31 | 1.21E-02 | FAD binding domain-containing protein                       |
| 19262240 | MAA_07954 | XM_007825952.1 | 1.31 | 6.86E-05 | hypothetical protein MAA_07954                              |
| 19264577 | MAA_10291 | XM_007828289.2 | 1.32 | 7.14E-06 | cyclopentanone 1,2-monooxygenase                            |
| 23633241 | MAA_11793 | XM_011412981.1 | 1.33 | 5.83E-04 | hypothetical protein MAA_11793                              |
| 19261469 | MAA_07183 | XM_007825181.1 | 1.34 | 4.51E-03 | hypothetical protein MAA_07183                              |
| 19264070 | MAA_09784 | XM_007827782.1 | 1.34 | 3.99E-10 | 16 kDa allergen                                             |

|          |           |                |      |          |                                                                     |
|----------|-----------|----------------|------|----------|---------------------------------------------------------------------|
| 19261690 | MAA_07404 | XM_007825402.1 | 1.35 | 1.72E-02 | B-(1-6) glucan synthase                                             |
| 19254648 | MAA_00362 | XM_007818360.2 | 1.35 | 2.15E-07 | PIF1 protein                                                        |
| 19254780 | MAA_00494 | XM_007818492.1 | 1.36 | 2.93E-03 | protein-arginine deiminase type-4                                   |
| 23633180 | MAA_11732 | XM_011412647.1 | 1.36 | 7.89E-05 | hypothetical protein MAA_11732                                      |
| 19261170 | MAA_06884 | XM_007824882.1 | 1.36 | 4.58E-07 | Aldehyde dehydrogenase                                              |
| 23632218 | MAA_10769 | XM_011412688.1 | 1.37 | 9.70E-03 | Thioredoxin                                                         |
| 19255583 | MAA_01297 | XM_007819295.1 | 1.38 | 2.87E-03 | haloacid dehalogenase                                               |
| 19254384 | MAA_00098 | XM_007818096.1 | 1.39 | 1.62E-02 | FluG domain-containing protein                                      |
| 19260837 | MAA_06551 | XM_007824549.1 | 1.39 | 1.79E-13 | macrophomate synthase                                               |
| 23632196 | MAA_10747 | XM_011412465.1 | 1.39 | 3.28E-03 | ankyrin repeat protein                                              |
| 19258326 | MAA_04040 | XM_007822038.1 | 1.41 | 3.83E-03 | alpha/beta hydrolase                                                |
| 19256358 | MAA_02072 | XM_007820070.1 | 1.41 | 3.01E-04 | Cytochrome P450                                                     |
| 23632364 | MAA_10915 | XM_011412861.1 | 1.41 | 1.01E-15 | hypothetical protein MAA_10915                                      |
| 23633185 | MAA_11737 | XM_011412652.1 | 1.42 | 2.34E-02 | hypothetical protein MAA_11737                                      |
| 19264853 | MAA_10567 | XM_007828565.1 | 1.42 | 3.77E-04 | restless-like transposase                                           |
| 19263023 | MAA_08737 | XM_007826735.1 | 1.42 | 3.28E-05 | Beta-lactamase-like protein                                         |
| 19264442 | MAA_10156 | XM_007828154.1 | 1.43 | 9.69E-15 | hypothetical protein MAA_10156                                      |
| 19254392 | MAA_00106 | XM_007818104.1 | 1.44 | 3.88E-03 | F-box domain protein                                                |
| 19264325 | MAA_10039 | XM_007828037.1 | 1.44 | 2.43E-04 | subgroup IIIi aminotransferase                                      |
| 19263202 | MAA_08916 | XM_007826914.2 | 1.45 | 4.02E-04 | multicopper oxidase                                                 |
| 19254406 | MAA_00120 | XM_007818118.2 | 1.45 | 7.43E-18 | Methyltransferase type 11                                           |
| 19264066 | MAA_09780 | XM_007827778.1 | 1.45 | 3.92E-02 | glycosyl transferase, group 2 family protein                        |
| 19262832 | MAA_08546 | XM_007826544.1 | 1.46 | 8.20E-03 | Amidase                                                             |
| 19260260 | MAA_05974 | XM_007823972.1 | 1.46 | 4.72E-04 | S-adenosylmethionine:tRNA ribosyltransferase-isomerase              |
| 19262653 | MAA_08367 | XM_007826365.2 | 1.47 | 4.92E-04 | ERG4/ERG24 ergosterol biosynthesis-like protein                     |
| 19264827 | MAA_10541 | XM_007828539.1 | 1.47 | 2.39E-14 | hypothetical protein MAA_10541                                      |
| 19263793 | MAA_09507 | XM_007827505.1 | 1.48 | 8.24E-03 | umta                                                                |
| 23632323 | MAA_10874 | XM_011412793.1 | 1.48 | 3.49E-05 | hypothetical protein MAA_10874                                      |
| 19263398 | MAA_09112 | XM_007827110.1 | 1.48 | 5.82E-21 | hypothetical protein MAA_09112                                      |
| 23632495 | MAA_11047 | XM_011413013.1 | 1.49 | 1.42E-17 | hypothetical protein MAA_11047                                      |
| 19263587 | MAA_09301 | XM_007827299.2 | 1.49 | 3.35E-02 | F-box domain-containing protein                                     |
| 19264448 | MAA_10162 | XM_007828160.2 | 1.50 | 1.25E-10 | transposase-like protein                                            |
| 19262651 | MAA_08365 | XM_007826363.1 | 1.51 | 2.02E-05 | multicopper oxidase                                                 |
| 19258027 | MAA_03741 | XM_007821739.2 | 1.57 | 1.62E-02 | Major facilitator superfamily domain, general substrate transporter |
| 19258327 | MAA_04041 | XM_007822039.2 | 1.61 | 1.26E-04 | hypothetical protein MAA_04041                                      |
| 19256546 | MAA_02260 | XM_007820258.1 | 1.62 | 1.28E-07 | sarcosine oxidase                                                   |
| 19260261 | MAA_05975 | XM_007823973.1 | 1.62 | 5.50E-03 | (2R)-phospho-3-sulfolactate synthase, ComA                          |
| 19265002 | MAA_10718 | XM_011412436.1 | 1.64 | 3.24E-06 | hypothetical protein MAA_10718                                      |
| 19263904 | MAA_09618 | XM_007827616.1 | 1.65 | 1.89E-04 | CobW domain protein                                                 |
| 19255201 | MAA_00915 | XM_007818913.1 | 1.66 | 6.20E-06 | Ribonuclease H-like protein                                         |
| 19262822 | MAA_08536 | XM_007826534.2 | 1.68 | 1.23E-05 | multidrug resistance protein 1                                      |
| 19264611 | MAA_10325 | XM_007828323.1 | 1.69 | 1.80E-03 | Nitrilase/cyanide hydratase and apolipoprotein N-acyltransferase    |
| 19255639 | MAA_01353 | XM_007819351.1 | 1.69 | 1.41E-05 | Oxoglutarate/iron-dependent oxygenase                               |
| 19262963 | MAA_08677 | XM_007826675.2 | 1.69 | 1.63E-02 | hypothetical protein MAA_08677                                      |
| 23633181 | MAA_11733 | XM_011412648.1 | 1.69 | 1.25E-10 | GTP cyclohydrolase family protein                                   |
| 19254647 | MAA_00361 | XM_007818359.1 | 1.71 | 7.92E-15 | transposase-like protein                                            |
| 19255666 | MAA_01380 | XM_007819378.1 | 1.71 | 2.14E-02 | uncharacterized protein MAA_01380                                   |
| 23633070 | MAA_11622 | XM_011412537.1 | 1.71 | 7.07E-04 | hypothetical protein MAA_11622                                      |
| 19264142 | MAA_09856 | XM_007827854.1 | 1.72 | 4.94E-05 | hypothetical protein MAA_09856                                      |
| 19264386 | MAA_10100 | XM_007828098.1 | 1.72 | 1.92E-02 | hypothetical protein MAA_10100                                      |
| 19262890 | MAA_08604 | XM_007826602.2 | 1.74 | 1.51E-11 | hypothetical protein MAA_08604                                      |
| 19258065 | MAA_03779 | XM_007821777.2 | 1.79 | 4.18E-10 | peptidylarginine deiminase-like enzyme                              |
| 19263659 | MAA_09373 | XM_007827371.1 | 1.79 | 6.55E-03 | hypothetical protein MAA_09373                                      |
| 19262652 | MAA_08366 | XM_007826364.1 | 1.80 | 3.44E-07 | methyltransferase                                                   |
| 19262904 | MAA_08618 | XM_007826616.1 | 1.81 | 1.57E-02 | Phytanoyl-CoA dioxygenase PhyH                                      |
| 19255194 | MAA_00908 | XM_007818906.1 | 1.81 | 4.99E-03 | might be a transmembrane protein                                    |
| 19263545 | MAA_09259 | XM_007827257.1 | 1.84 | 2.37E-06 | epoxidase subunit A                                                 |
| 19262906 | MAA_08620 | XM_007826618.1 | 1.84 | 2.49E-02 | nmrA-like family protein                                            |
| 19255954 | MAA_01668 | XM_007819666.2 | 1.84 | 6.33E-05 | Phosphoesterase                                                     |
| 19255690 | MAA_01404 | XM_007819402.1 | 1.84 | 5.48E-36 | hypothetical protein MAA_01404                                      |
| 19254771 | MAA_00485 | XM_007818483.1 | 1.86 | 3.91E-02 | hypothetical protein MAA_00485                                      |

|          |           |                |       |          |                                                                     |
|----------|-----------|----------------|-------|----------|---------------------------------------------------------------------|
| 19262903 | MAA_08617 | XM_007826615.2 | 1.87  | 3.28E-02 | aromatic amino acid aminotransferase                                |
| 19260829 | MAA_06543 | XM_007824541.2 | 1.87  | 8.95E-10 | cytochrome P450 [Metarhizium robertsii]                             |
| 19263874 | MAA_09588 | XM_007827586.2 | 1.89  | 1.91E-05 | TfdA family Taurine catabolism dioxygenase TauD                     |
| 19263645 | MAA_09359 | XM_007827357.2 | 1.89  | 2.82E-04 | Pfs, NACHT and WD domain protein                                    |
| 19261010 | MAA_06724 | XM_007824722.1 | 1.90  | 2.55E-05 | RmlC-like jelly roll fold protein                                   |
| 19264734 | MAA_10448 | XM_007828446.1 | 1.92  | 1.87E-05 | hydrolase                                                           |
| 19260313 | MAA_06027 | XM_007824025.1 | 1.92  | 7.88E-17 | type 11 methyltransferase                                           |
| 19263747 | MAA_09461 | XM_007827459.1 | 1.93  | 9.96E-19 | carbohydrate-binding WSC domain protein                             |
| 23633210 | MAA_11762 | XM_011412677.1 | 1.93  | 5.16E-04 | reverse transcriptase                                               |
| 19257622 | MAA_03336 | XM_007821334.1 | 1.94  | 2.40E-07 | Peptidase S8/S53, subtilisin/kexin/sedolisin                        |
| 19255582 | MAA_01296 | XM_007819294.1 | 1.94  | 2.70E-02 | Cytochrome P450 CYP620N1                                            |
| 19262577 | MAA_08291 | XM_007826289.2 | 1.94  | 2.49E-04 | sulfatase domain-containing protein                                 |
| 19264817 | MAA_10531 | XM_007828529.1 | 1.95  | 1.62E-05 | Oxoglutarate/iron-dependent oxygenase                               |
| 19258293 | MAA_04007 | XM_007822005.2 | 1.95  | 2.27E-08 | alcohol dehydrogenase GroES domain-containing protein               |
| 19262927 | MAA_08641 | XM_007826639.2 | 1.97  | 4.02E-03 | sulfatase domain protein                                            |
| 19262905 | MAA_08619 | XM_007826617.2 | 1.97  | 5.09E-07 | choline transport protein                                           |
| 19261978 | MAA_07692 | XM_007825690.1 | 1.97  | 1.30E-04 | carbohydrate-binding protein, partial                               |
| 19264603 | MAA_10317 | XM_007828315.1 | 1.98  | 7.41E-10 | pyridoxal-dependent decarboxylase domain protein                    |
| 19263643 | MAA_09357 | XM_007827355.2 | 1.99  | 3.54E-02 | hypothetical protein X797_010135                                    |
| 19262974 | MAA_08688 | XM_007826686.1 | 2.00  | 1.94E-11 | CFEM domain protein                                                 |
| 19261356 | MAA_07070 | XM_007825068.1 | 2.01  | 9.06E-23 | hypothetical protein MAA_07070                                      |
| 19256607 | MAA_02321 | XM_007820319.1 | 2.02  | 8.58E-12 | Major facilitator superfamily domain, general substrate transporter |
| 19262655 | MAA_08369 | XM_007826367.1 | 2.07  | 9.14E-09 | Dimeric alpha-beta barrel                                           |
| 19264481 | MAA_10195 | XM_007828193.2 | 2.07  | 1.54E-04 | Ctr copper transporter                                              |
| 19260312 | MAA_06026 | XM_007824024.1 | 2.08  | 4.42E-12 | phosphatidylserine decarboxylase family protein                     |
| 19264464 | MAA_10178 | XM_007828176.1 | 2.10  | 1.30E-08 | Cyclin PHO80-like protein                                           |
| 23632628 | MAA_11180 | XM_011413146.1 | 2.13  | 1.14E-03 | Cellobiose dehydrogenase, cytochrome                                |
| 19262559 | MAA_08273 | XM_007826271.1 | 2.16  | 1.34E-08 | PA14 domain protein                                                 |
| 19262218 | MAA_07932 | XM_007825930.1 | 2.17  | 4.74E-03 | Pyruvate/2-oxoglutarate dehydrogenase                               |
| 19262909 | MAA_08623 | XM_007826621.1 | 2.21  | 4.72E-02 | phytanoyl-CoA dioxygenase                                           |
| 23632994 | MAA_11546 | XM_011413541.1 | 2.22  | 1.69E-07 | hypothetical protein MAA_11546                                      |
| 19264319 | MAA_10033 | XM_007828031.2 | 2.28  | 1.83E-10 | polyketide synthase                                                 |
| 19260992 | MAA_06706 | XM_007824704.1 | 2.30  | 3.66E-03 | short-chain dehydrogenase                                           |
| 19262907 | MAA_08621 | XM_007826619.1 | 2.31  | 1.22E-02 | f420-dependent NADP reductase                                       |
| 19258452 | MAA_04166 | XM_007822164.1 | 2.35  | 3.94E-08 | DUF1275 domain protein                                              |
| 19255985 | MAA_01699 | XM_007819697.1 | 2.40  | 1.03E-07 | serin endopeptidase                                                 |
| 19264505 | MAA_10219 | XM_007828217.2 | 2.44  | 2.22E-02 | FAD/FMN-containing isoamyl alcohol oxidase MreA                     |
| 19260311 | MAA_06025 | XM_007824023.2 | 2.51  | 1.02E-12 | PRO1A C6 Zink-finger protein                                        |
| 23633189 | MAA_11741 | XM_011412656.1 | 2.75  | 3.55E-36 | hypothetical protein MAA_11741                                      |
| 19264326 | MAA_10040 | XM_007828038.1 | 2.84  | 2.30E-11 | Zn(2)-Cys(6) zinc finger domain protein                             |
| 19258063 | MAA_03777 | XM_007821775.1 | 2.87  | 4.00E-02 | Bys1 family protein                                                 |
| 19262560 | MAA_08274 | XM_007826272.2 | 2.91  | 1.13E-12 | hypothetical protein MAA_08274                                      |
| 19256813 | MAA_02527 | XM_007820525.1 | 2.96  | 1.06E-03 | hypothetical protein MAA_02527                                      |
| 19264126 | MAA_09840 | XM_007827838.1 | 3.01  | 3.69E-02 | hypothetical protein MAA_09840                                      |
| 23633270 | MAA_11822 | XM_011413159.1 | 3.16  | 1.86E-12 | GPCR, PTH-type                                                      |
| 19255481 | MAA_01195 | XM_007819193.1 | 3.17  | 2.62E-07 | cytosine deaminase                                                  |
| 19255706 | MAA_01420 | XM_007819418.1 | 3.28  | 2.27E-12 | hypothetical protein MAA_01420                                      |
| 19255149 | MAA_00863 | XM_007818861.2 | 3.53  | 1.78E-03 | Protein kinase-like protein                                         |
| 19264610 | MAA_10324 | XM_007828322.1 | 3.62  | 3.70E-03 | NmrA-like family protein                                            |
| 19264812 | MAA_10526 | XM_007828524.1 | 3.71  | 4.03E-02 | hypothetical protein MAA_10526                                      |
| 19261429 | MAA_07143 | XM_007825141.1 | 3.99  | 2.93E-02 | DUF946 domain-containing protein                                    |
| 19255705 | MAA_01419 | XM_007819417.1 | 4.01  | 2.64E-03 | Calcium-mediated lectin                                             |
| 19261893 | MAA_07607 | XM_007825605.1 | 4.56  | 2.71E-24 | hypothetical protein MAA_07607                                      |
| 19257555 | MAA_03269 | XM_007821267.2 | 5.05  | 3.68E-02 | membrane transporter                                                |
| 19255348 | MAA_01062 | XM_007819060.2 | 7.81  | 2.89E-37 | hypothetical protein MAA_01062                                      |
| 19264403 | MAA_10117 | XM_007828115.1 | 10.70 | 1.17E-02 | Zn(2)-C6 fungal-type DNA-binding domain protein                     |
| 19262821 | MAA_08535 | XM_007826533.1 | 11.37 | 2.47E-02 | tripeptidyl peptidase a                                             |
| 19264488 | MAA_10202 | XM_007828200.2 | 14.39 | 4.08E-10 | Beta-ketoacyl synthase                                              |

**Table S3.** GO analysis of differentially expressed genes in *M. robertsii*  $\Delta$ cfpI versus WT strain.

| GO_ID      | GO_class | p-value  | Gene_ID  | Gene_name | log <sub>2</sub> R | Annotation                                               |
|------------|----------|----------|----------|-----------|--------------------|----------------------------------------------------------|
| GO:0005575 | 2        | 6.61E-06 | 19262961 | MAA_08675 | -14.89             | hypothetical protein MAA_08675                           |
| GO:0005575 | 2        | 6.61E-06 | 19261241 | MAA_06955 | -11.71             | lipase 2                                                 |
| GO:0005575 | 2        | 6.61E-06 | 19262574 | MAA_08288 | -11.53             | Cyclin-like F-box                                        |
| GO:0005575 | 2        | 6.61E-06 | 19254642 | MAA_00356 | -10.67             | glycosyl transferase                                     |
| GO:0005575 | 2        | 6.61E-06 | 19264862 | MAA_10576 | -10.62             | Uncharacterized protein MAA_10576                        |
| GO:0005575 | 2        | 6.61E-06 | 19255828 | MAA_01542 | -10.54             | hypothetical protein MAA_01542                           |
| GO:0005575 | 2        | 6.61E-06 | 19262985 | MAA_08699 | -8.86              | Beta-ketoacyl synthase                                   |
| GO:0005575 | 2        | 6.61E-06 | 19261770 | MAA_07484 | -7.95              | peptidase alpha-lytic pro domain protein                 |
| GO:0005575 | 2        | 6.61E-06 | 19262600 | MAA_08314 | -5.35              | ATPase                                                   |
| GO:0005575 | 2        | 6.61E-06 | 19259182 | MAA_04896 | -5.06              | regulatory P domain-containing protein                   |
| GO:0005575 | 2        | 6.61E-06 | 19260861 | MAA_06575 | -4.95              | Beta-ketoacyl synthase                                   |
| GO:0005575 | 2        | 6.61E-06 | 19255257 | MAA_00971 | -4.81              | Aromatic prenyltransferase, DMATS type                   |
| GO:0005575 | 2        | 6.61E-06 | 19264560 | MAA_10274 | -4.58              | TAM domain methyltransferase                             |
| GO:0005575 | 2        | 6.61E-06 | 19262115 | MAA_07829 | -4.38              | WD40 repeat-like-containing domain protein               |
| GO:0005575 | 2        | 6.61E-06 | 23633214 | MAA_11766 | -3.86              | hypothetical protein MAA_11766                           |
| GO:0005575 | 2        | 6.61E-06 | 19257526 | MAA_03240 | -3.79              | hypothetical protein MAA_03240                           |
| GO:0005575 | 2        | 6.61E-06 | 19264332 | MAA_10046 | -3.68              | Aspartic acid decarboxylase, DtxS4                       |
| GO:0005575 | 2        | 6.61E-06 | 19260466 | MAA_06180 | -3.64              | peroxidase manganese-dependent 1                         |
| GO:0005575 | 2        | 6.61E-06 | 19262048 | MAA_07762 | -3.64              | hypothetical protein MAA_07762                           |
| GO:0005575 | 2        | 6.61E-06 | 19263074 | MAA_08788 | -3.60              | ankyrin repeat-containing protein                        |
| GO:0005575 | 2        | 6.61E-06 | 19261383 | MAA_07097 | -3.19              | C2H2 transcription factor                                |
| GO:0005575 | 2        | 6.61E-06 | 19263838 | MAA_09552 | -3.11              | FAD-binding, type 2                                      |
| GO:0005575 | 2        | 6.61E-06 | 23632897 | MAA_11449 | -2.96              | Ankyrin repeat-containing domain protein                 |
| GO:0005575 | 2        | 6.61E-06 | 19255921 | MAA_01635 | -2.92              | integral membrane protein pth11                          |
| GO:0005575 | 2        | 6.61E-06 | 19254665 | MAA_00379 | -2.77              | tlh5                                                     |
| GO:0005575 | 2        | 6.61E-06 | 19263667 | MAA_09381 | -2.75              | protoporphyrinogen oxidase                               |
| GO:0005575 | 2        | 6.61E-06 | 19263325 | MAA_09039 | -2.73              | hydantoinase                                             |
| GO:0005575 | 2        | 6.61E-06 | 19264331 | MAA_10045 | -2.72              | Aldo/keto reductase, DtxS3                               |
| GO:0005575 | 2        | 6.61E-06 | 19263851 | MAA_09565 | -2.70              | Metallophosphoesterase                                   |
| GO:0005575 | 2        | 6.61E-06 | 23632304 | MAA_10855 | -2.66              | hypothetical protein MAA_10855                           |
| GO:0005575 | 2        | 6.61E-06 | 19261160 | MAA_06874 | -2.59              | Necrosis inducing                                        |
| GO:0005575 | 2        | 6.61E-06 | 19262950 | MAA_08664 | -2.47              | hypothetical protein MAA_08664                           |
| GO:0005575 | 2        | 6.61E-06 | 19259811 | MAA_05525 | -2.46              | endo-1,3(4)-beta-glucanase                               |
| GO:0005575 | 2        | 6.61E-06 | 19257223 | MAA_02937 | -2.41              | hypothetical protein MAA_02937                           |
| GO:0005575 | 2        | 6.61E-06 | 19262575 | MAA_08289 | -2.35              | cell surface protein (Mas1)                              |
| GO:0005575 | 2        | 6.61E-06 | 19257525 | MAA_03239 | -2.33              | Beta-ketoacyl synthase                                   |
| GO:0005575 | 2        | 6.61E-06 | 19263547 | MAA_09261 | -2.25              | Regulator of G protein signaling superfamily             |
| GO:0005575 | 2        | 6.61E-06 | 19264670 | MAA_10384 | -2.20              | dynamain family protein                                  |
| GO:0005575 | 2        | 6.61E-06 | 19262060 | MAA_07774 | -2.19              | ankyrin protein                                          |
| GO:0005575 | 2        | 6.61E-06 | 19264754 | MAA_10468 | -2.18              | catalytic protein                                        |
| GO:0005575 | 2        | 6.61E-06 | 19254299 | MAA_00013 | -2.17              | lipase, class 3                                          |
| GO:0005575 | 2        | 6.61E-06 | 19256264 | MAA_01978 | -2.14              | hypothetical protein MAA_01978                           |
| GO:0005575 | 2        | 6.61E-06 | 19264234 | MAA_09948 | -2.13              | nitroreductase protein                                   |
| GO:0005575 | 2        | 6.61E-06 | 19261774 | MAA_07488 | -2.11              | exo-1,3-beta-D-glucanase                                 |
| GO:0005575 | 2        | 6.61E-06 | 19259153 | MAA_04867 | -2.08              | Pyridine nucleotide-disulfide oxidoreductase             |
| GO:0005575 | 2        | 6.61E-06 | 19262292 | MAA_08006 | -1.99              | hypothetical protein MAA_08006                           |
| GO:0005575 | 2        | 6.61E-06 | 19259894 | MAA_05608 | -1.98              | hypothetical protein MAA_05608                           |
| GO:0005575 | 2        | 6.61E-06 | 19254732 | MAA_00446 | -1.97              | NADPH dehydrogenase                                      |
| GO:0005575 | 2        | 6.61E-06 | 19260857 | MAA_06571 | -1.95              | NAD(P)-binding domain protein                            |
| GO:0005575 | 2        | 6.61E-06 | 19256668 | MAA_02382 | -1.91              | Oligopeptide transporter OPT superfamily                 |
| GO:0005575 | 2        | 6.61E-06 | 19258919 | MAA_04633 | -1.90              | hypothetical protein MAA_04633                           |
| GO:0005575 | 2        | 6.61E-06 | 19264518 | MAA_10232 | -1.88              | ankyrin repeat containing protein                        |
| GO:0005575 | 2        | 6.61E-06 | 19256825 | MAA_02539 | -1.86              | cell surface protein (Mas1)                              |
| GO:0005575 | 2        | 6.61E-06 | 19261648 | MAA_07362 | -1.85              | RNA-directed RNA polymerase (Sad-1)                      |
| GO:0005575 | 2        | 6.61E-06 | 19257527 | MAA_03241 | -1.82              | glutamyl-tRNA(Gln) amidotransferase                      |
| GO:0005575 | 2        | 6.61E-06 | 19264330 | MAA_10044 | -1.78              | Cytochrome P450, DtxS2                                   |
| GO:0005575 | 2        | 6.61E-06 | 19261778 | MAA_07492 | -1.78              | c6 zinc finger domain containing protein                 |
| GO:0005575 | 2        | 6.61E-06 | 19263736 | MAA_09450 | -1.76              | proteinrelated to ser/arg-related nuclear matrix protein |

|            |   |          |          |           |       |                                                                  |
|------------|---|----------|----------|-----------|-------|------------------------------------------------------------------|
| GO:0005575 | 2 | 6.61E-06 | 19264203 | MAA_09917 | -1.74 | Cellular retinaldehyde-binding/triple function                   |
| GO:0005575 | 2 | 6.61E-06 | 23633221 | MAA_11773 | -1.72 | hypothetical protein MAA_11773                                   |
| GO:0005575 | 2 | 6.61E-06 | 19254338 | MAA_00052 | -1.71 | Nucleoside phosphorylase domain protein                          |
| GO:0005575 | 2 | 6.61E-06 | 19256493 | MAA_02207 | -1.71 | carbohydrate esterase family 9 protein                           |
| GO:0005575 | 2 | 6.61E-06 | 19254288 | MAA_00002 | -1.67 | hypothetical protein MAA_00002                                   |
| GO:0005575 | 2 | 6.61E-06 | 19255591 | MAA_01305 | -1.67 | hypothetical protein MAA_01305                                   |
| GO:0005575 | 2 | 6.61E-06 | 19263800 | MAA_09514 | -1.67 | Cytochrome P450 CYP58S1                                          |
| GO:0005575 | 2 | 6.61E-06 | 19259418 | MAA_05132 | -1.66 | NAD(P)-binding protein                                           |
| GO:0005575 | 2 | 6.61E-06 | 19255592 | MAA_01306 | -1.64 | protein kinase-like domain protein                               |
| GO:0005575 | 2 | 6.61E-06 | 19255540 | MAA_01254 | -1.63 | hypothetical protein X797_005849                                 |
| GO:0005575 | 2 | 6.61E-06 | 19263305 | MAA_09019 | -1.62 | tri14-like protein                                               |
| GO:0005575 | 2 | 6.61E-06 | 19255287 | MAA_01001 | -1.61 | GCN5-related N-acetyltransferase (GNAT) domain protein           |
| GO:0005575 | 2 | 6.61E-06 | 19257988 | MAA_03702 | -1.61 | transcription factor RfeG                                        |
| GO:0005575 | 2 | 6.61E-06 | 19261793 | MAA_07507 | -1.59 | Pyoverdine biosynthesis                                          |
| GO:0005575 | 2 | 6.61E-06 | 19259509 | MAA_05223 | -1.56 | CAS1 protein                                                     |
| GO:0005575 | 2 | 6.61E-06 | 19254343 | MAA_00057 | -1.53 | choline dehydrogenase                                            |
| GO:0005575 | 2 | 6.61E-06 | 19261230 | MAA_06944 | -1.53 | UDP-glucose 4-epimerase                                          |
| GO:0005575 | 2 | 6.61E-06 | 19258281 | MAA_03995 | -1.51 | ThiJ/PfpI family protein                                         |
| GO:0005575 | 2 | 6.61E-06 | 19264329 | MAA_10043 | -1.49 | destruxin synthetase, DtxS1                                      |
| GO:0005575 | 2 | 6.61E-06 | 19263759 | MAA_09473 | -1.48 | DUF1338 domain protein                                           |
| GO:0005575 | 2 | 6.61E-06 | 19255901 | MAA_01615 | -1.48 | glucose oxidase                                                  |
| GO:0005575 | 2 | 6.61E-06 | 19257557 | MAA_03271 | -1.47 | flavin-binding monooxygenase                                     |
| GO:0005575 | 2 | 6.61E-06 | 19257582 | MAA_03296 | -1.47 | hypothetical protein MAA_03296                                   |
| GO:0005575 | 2 | 6.61E-06 | 19263128 | MAA_08842 | -1.45 | NAD(P)-binding domain protein                                    |
| GO:0005575 | 2 | 6.61E-06 | 19254740 | MAA_00454 | -1.44 | Phospholipase C, phosphatidylinositol-specific, X domain protein |
| GO:0005575 | 2 | 6.61E-06 | 19263514 | MAA_09228 | -1.40 | lysozyme                                                         |
| GO:0005575 | 2 | 6.61E-06 | 19260070 | MAA_05784 | -1.39 | hypothetical protein MAA_05784                                   |
| GO:0005575 | 2 | 6.61E-06 | 19254364 | MAA_00078 | -1.39 | FAD dependent monooxygenase                                      |
| GO:0005575 | 2 | 6.61E-06 | 19261013 | MAA_06727 | -1.39 | duf614 domain containing protein                                 |
| GO:0005575 | 2 | 6.61E-06 | 19264752 | MAA_10466 | -1.39 | Trimeric LpxA-like protein                                       |
| GO:0005575 | 2 | 6.61E-06 | 19257586 | MAA_03300 | -1.37 | Tetratricopeptide repeat protein                                 |
| GO:0005575 | 2 | 6.61E-06 | 19261981 | MAA_07695 | -1.37 | mitochondrial chaperone BCS1                                     |
| GO:0005575 | 2 | 6.61E-06 | 19259921 | MAA_05635 | -1.37 | CsbD-like protein                                                |
| GO:0005575 | 2 | 6.61E-06 | 19256461 | MAA_02175 | -1.36 | immunoglobulin I-set domain-containing protein                   |
| GO:0005575 | 2 | 6.61E-06 | 23632740 | MAA_11292 | -1.36 | hypothetical protein MAA_11292                                   |
| GO:0005575 | 2 | 6.61E-06 | 19261596 | MAA_07310 | -1.34 | integral membrane family protein                                 |
| GO:0005575 | 2 | 6.61E-06 | 19261280 | MAA_06994 | -1.33 | secretory lipase                                                 |
| GO:0005575 | 2 | 6.61E-06 | 19257069 | MAA_02783 | -1.32 | mucoidy inhibitor A                                              |
| GO:0005575 | 2 | 6.61E-06 | 19255482 | MAA_01196 | -1.32 | cysteine-rich secreted protein                                   |
| GO:0005575 | 2 | 6.61E-06 | 19262758 | MAA_08472 | -1.32 | Glycerate kinase                                                 |
| GO:0005575 | 2 | 6.61E-06 | 19262103 | MAA_07817 | -1.31 | glycoside hydrolase family 76 protein                            |
| GO:0005575 | 2 | 6.61E-06 | 19259756 | MAA_05470 | -1.30 | transferase family protein                                       |
| GO:0005575 | 2 | 6.61E-06 | 19257345 | MAA_03059 | -1.29 | meiotically up-regulated 65 protein                              |
| GO:0005575 | 2 | 6.61E-06 | 19262044 | MAA_07758 | -1.29 | coagulation factor 5/8 type domain protein                       |
| GO:0005575 | 2 | 6.61E-06 | 19259139 | MAA_04853 | -1.28 | hypothetical protein MAA_04853                                   |
| GO:0005575 | 2 | 6.61E-06 | 19261242 | MAA_06956 | -1.26 | hypothetical protein MAA_06956                                   |
| GO:0005575 | 2 | 6.61E-06 | 19259557 | MAA_05271 | -1.24 | nicotinamide N-methyltransferase                                 |
| GO:0005575 | 2 | 6.61E-06 | 19261083 | MAA_06797 | -1.24 | peptidase family M28                                             |
| GO:0005575 | 2 | 6.61E-06 | 19262418 | MAA_08132 | -1.24 | hypothetical protein MAA_08132                                   |
| GO:0005575 | 2 | 6.61E-06 | 19258721 | MAA_04435 | -1.23 | Salicylate synthase                                              |
| GO:0005575 | 2 | 6.61E-06 | 19264231 | MAA_09945 | -1.22 | c6 zinc finger domain containing protein                         |
| GO:0005575 | 2 | 6.61E-06 | 19256757 | MAA_02471 | -1.22 | phosducin                                                        |
| GO:0005575 | 2 | 6.61E-06 | 19263892 | MAA_09606 | -1.21 | FAD binding domain-containing protein                            |
| GO:0005575 | 2 | 6.61E-06 | 19263958 | MAA_09672 | -1.20 | WD domain-containing protein                                     |
| GO:0005575 | 2 | 6.61E-06 | 19258805 | MAA_04519 | -1.19 | caspase domain-containing protein                                |
| GO:0005575 | 2 | 6.61E-06 | 19255970 | MAA_01684 | -1.19 | Leucine Rich Repeat domain protein                               |
| GO:0005575 | 2 | 6.61E-06 | 19263848 | MAA_09562 | -1.18 | fatty acid hydroxylase superfamily protein                       |
| GO:0005575 | 2 | 6.61E-06 | 19261382 | MAA_07096 | -1.18 | hypothetical protein MAA_07096                                   |
| GO:0005575 | 2 | 6.61E-06 | 19257045 | MAA_02759 | -1.18 | Ca2+ permeable channel                                           |
| GO:0005575 | 2 | 6.61E-06 | 19258127 | MAA_03841 | -1.18 | Cytochrome P450 CYP6003A1                                        |
| GO:0005575 | 2 | 6.61E-06 | 19264076 | MAA_09790 | -1.16 | hypothetical protein MAA_09790                                   |

|            |   |          |          |           |       |                                                                    |
|------------|---|----------|----------|-----------|-------|--------------------------------------------------------------------|
| GO:0005575 | 2 | 6.61E-06 | 19258535 | MAA_04249 | -1.16 | methyltransferase                                                  |
| GO:0005575 | 2 | 6.61E-06 | 19258280 | MAA_03994 | -1.15 | glycosyl transferase GT-A type structural fold protein             |
| GO:0005575 | 2 | 6.61E-06 | 19258514 | MAA_04228 | -1.15 | phospho-2-dehydro-3-deoxyheptonate aldolase                        |
| GO:0005575 | 2 | 6.61E-06 | 19262192 | MAA_07906 | -1.15 | Alpha-hydroxy acid dehydrogenase, FMN-dependent                    |
| GO:0005575 | 2 | 6.61E-06 | 23632203 | MAA_10754 | -1.15 | gag-pol polyprotein                                                |
| GO:0005575 | 2 | 6.61E-06 | 19255594 | MAA_01308 | -1.14 | Peptidase S8/S53, subtilisin/kexin/sedolisin                       |
| GO:0005575 | 2 | 6.61E-06 | 19261293 | MAA_07007 | -1.14 | alkaline phosphatase-like protein                                  |
| GO:0005575 | 2 | 6.61E-06 | 19255473 | MAA_01187 | -1.13 | DUF2205 domain protein [Metarhizium robertsii]                     |
| GO:0005575 | 2 | 6.61E-06 | 19264476 | MAA_10190 | -1.12 | Heterokaryon incompatibility                                       |
| GO:0005575 | 2 | 6.61E-06 | 19263310 | MAA_09024 | -1.11 | selenium-binding protein                                           |
| GO:0005575 | 2 | 6.61E-06 | 19254358 | MAA_00072 | -1.10 | hypothetical protein MAA_00072                                     |
| GO:0005575 | 2 | 6.61E-06 | 19261473 | MAA_07187 | -1.09 | expression library immunization antigen 1                          |
| GO:0005575 | 2 | 6.61E-06 | 19262532 | MAA_08246 | -1.09 | ankyrin repeat domain containing protein                           |
| GO:0005575 | 2 | 6.61E-06 | 19260886 | MAA_06600 | -1.09 | hypothetical protein MAA_06600                                     |
| GO:0005575 | 2 | 6.61E-06 | 19257500 | MAA_03214 | -1.08 | Amino acid transporter, transmembrane                              |
| GO:0005575 | 2 | 6.61E-06 | 19261097 | MAA_06811 | -1.07 | hypothetical protein H634G_06914                                   |
| GO:0005575 | 2 | 6.61E-06 | 19255698 | MAA_01412 | -1.06 | Ankyrin repeat-containing domain protein                           |
| GO:0005575 | 2 | 6.61E-06 | 19263194 | MAA_08908 | -1.06 | FHA domain containing protein                                      |
| GO:0005575 | 2 | 6.61E-06 | 19261231 | MAA_06945 | -1.05 | glycosyltransferase family 4 protein                               |
| GO:0005575 | 2 | 6.61E-06 | 19256410 | MAA_02124 | -1.05 | menaquinone methyltransferase related to dlpA protein              |
| GO:0005575 | 2 | 6.61E-06 | 19262238 | MAA_07952 | -1.03 | Glycosyl transferase, family 25                                    |
| GO:0005575 | 2 | 6.61E-06 | 23632270 | MAA_10821 | -1.03 | ubiquitin-conjugating enzyme                                       |
| GO:0005575 | 2 | 6.61E-06 | 19262129 | MAA_07843 | -1.02 | patatin-like phospholipase                                         |
| GO:0005575 | 2 | 6.61E-06 | 19258332 | MAA_04046 | -1.02 | RNA recognition motif domain protein                               |
| GO:0005575 | 2 | 6.61E-06 | 19256214 | MAA_01928 | -1.02 | Ubiquitin 3 binding protein But2                                   |
| GO:0005575 | 2 | 6.61E-06 | 19255412 | MAA_01126 | -1.02 | Alpha/beta hydrolase fold-3                                        |
| GO:0005575 | 2 | 6.61E-06 | 19255071 | MAA_00785 | -1.02 | annexin ANXC4                                                      |
| GO:0005575 | 2 | 6.61E-06 | 19261480 | MAA_07194 | -1.01 | hypothetical protein MAA_07194                                     |
| GO:0005575 | 2 | 6.61E-06 | 19264829 | MAA_10543 | 1.00  | aminoglycoside 3'-phosphotransferase/choline kinase domain protein |
| GO:0005575 | 2 | 6.61E-06 | 19255584 | MAA_01298 | 1.01  | O-methyltransferase                                                |
| GO:0005575 | 2 | 6.61E-06 | 19261146 | MAA_06860 | 1.01  | F-box domain protein                                               |
| GO:0005575 | 2 | 6.61E-06 | 19260841 | MAA_06555 | 1.02  | methyltransferase                                                  |
| GO:0005575 | 2 | 6.61E-06 | 19263890 | MAA_09604 | 1.02  | Ig domain protein group 2 domain protein                           |
| GO:0005575 | 2 | 6.61E-06 | 19263417 | MAA_09131 | 1.04  | zinc finger domain-containing protein                              |
| GO:0005575 | 2 | 6.61E-06 | 23633159 | MAA_11711 | 1.04  | zinc finger domain-containing protein                              |
| GO:0005575 | 2 | 6.61E-06 | 19263978 | MAA_09692 | 1.04  | Oxoglutarate/iron-dependent oxygenase                              |
| GO:0005575 | 2 | 6.61E-06 | 19256915 | MAA_02629 | 1.05  | Alcohol dehydrogenase superfamily, zinc-type                       |
| GO:0005575 | 2 | 6.61E-06 | 19263391 | MAA_09105 | 1.06  | hypothetical protein MAA_09105                                     |
| GO:0005575 | 2 | 6.61E-06 | 19262673 | MAA_08387 | 1.06  | short-chain dehydrogenase                                          |
| GO:0005575 | 2 | 6.61E-06 | 19262471 | MAA_08185 | 1.06  | LEA domain protein                                                 |
| GO:0005575 | 2 | 6.61E-06 | 19255677 | MAA_01391 | 1.06  | transposase                                                        |
| GO:0005575 | 2 | 6.61E-06 | 19259242 | MAA_04956 | 1.07  | Amine oxidase                                                      |
| GO:0005575 | 2 | 6.61E-06 | 19262964 | MAA_08678 | 1.07  | hypothetical protein MAA_08678                                     |
| GO:0005575 | 2 | 6.61E-06 | 23632906 | MAA_11458 | 1.07  | hypothetical protein MAA_11458                                     |
| GO:0005575 | 2 | 6.61E-06 | 19257788 | MAA_03502 | 1.09  | zeta toxin family protein                                          |
| GO:0005575 | 2 | 6.61E-06 | 19262692 | MAA_08406 | 1.10  | glycoside hydrolase family 16                                      |
| GO:0005575 | 2 | 6.61E-06 | 19256318 | MAA_02032 | 1.11  | 3-phytase                                                          |
| GO:0005575 | 2 | 6.61E-06 | 19263423 | MAA_09137 | 1.12  | Protein kinase-like protein                                        |
| GO:0005575 | 2 | 6.61E-06 | 19264721 | MAA_10435 | 1.12  | sulfite oxidase                                                    |
| GO:0005575 | 2 | 6.61E-06 | 19259511 | MAA_05225 | 1.12  | extracellular dipeptidyl-peptidase Dpp4                            |
| GO:0005575 | 2 | 6.61E-06 | 19258466 | MAA_04180 | 1.12  | TfdA family Taurine catabolism dioxygenase TauD                    |
| GO:0005575 | 2 | 6.61E-06 | 19258184 | MAA_03898 | 1.14  | long-chain-fatty-acid-CoA ligase                                   |
| GO:0005575 | 2 | 6.61E-06 | 19255889 | MAA_01603 | 1.14  | hypothetical protein MAA_01603                                     |
| GO:0005575 | 2 | 6.61E-06 | 19264450 | MAA_10164 | 1.14  | reverse transcriptase, RNaseH                                      |
| GO:0005575 | 2 | 6.61E-06 | 19263386 | MAA_09100 | 1.14  | DDE superfamily endonuclease, CENP-B-like protein                  |
| GO:0005575 | 2 | 6.61E-06 | 19257778 | MAA_03492 | 1.14  | feruloyl esterase B                                                |
| GO:0005575 | 2 | 6.61E-06 | 19262472 | MAA_08186 | 1.14  | late embryogenesis abundant protein                                |
| GO:0005575 | 2 | 6.61E-06 | 19258564 | MAA_04278 | 1.15  | hypothetical protein MAA_04278                                     |
| GO:0005575 | 2 | 6.61E-06 | 19264024 | MAA_09738 | 1.15  | ThiJ/PfpI family protein                                           |
| GO:0005575 | 2 | 6.61E-06 | 19263888 | MAA_09602 | 1.16  | Six-hairpin glycosidase                                            |
| GO:0005575 | 2 | 6.61E-06 | 19263266 | MAA_08980 | 1.16  | Cyanovirin-N                                                       |



|            |   |          |          |           |      |                                                                  |
|------------|---|----------|----------|-----------|------|------------------------------------------------------------------|
| GO:0005575 | 2 | 6.61E-06 | 19263977 | MAA_09691 | 1.17 | 1-aminocyclopropane-1-carboxylate synthase                       |
| GO:0005575 | 2 | 6.61E-06 | 19260840 | MAA_06554 | 1.19 | delta-12 fatty acid desaturase                                   |
| GO:0005575 | 2 | 6.61E-06 | 19260584 | MAA_06298 | 1.19 | MFS transporter [Metarhizium robertsii]                          |
| GO:0005575 | 2 | 6.61E-06 | 19263497 | MAA_09211 | 1.19 | hypothetical protein MAA_09211                                   |
| GO:0005575 | 2 | 6.61E-06 | 19257789 | MAA_03503 | 1.19 | Protein kinase-like protein                                      |
| GO:0005575 | 2 | 6.61E-06 | 19264772 | MAA_10486 | 1.20 | gamma-glutamyltranspeptidase periplasmic precursor               |
| GO:0005575 | 2 | 6.61E-06 | 19260689 | MAA_06403 | 1.21 | glycoside hydrolase family 76 protein                            |
| GO:0005575 | 2 | 6.61E-06 | 19264141 | MAA_09855 | 1.22 | 4-hydroxyphenylpyruvate dioxygenase                              |
| GO:0005575 | 2 | 6.61E-06 | 19259110 | MAA_04824 | 1.23 | non-ribosomal peptide synthetase                                 |
| GO:0005575 | 2 | 6.61E-06 | 19264818 | MAA_10532 | 1.23 | peptidase family M3                                              |
| GO:0005575 | 2 | 6.61E-06 | 19257096 | MAA_02810 | 1.24 | Fungal chitosanase                                               |
| GO:0005575 | 2 | 6.61E-06 | 19264758 | MAA_10472 | 1.26 | gag-pol polyprotein                                              |
| GO:0005575 | 2 | 6.61E-06 | 19255997 | MAA_01711 | 1.27 | Beta-lactamase-like protein                                      |
| GO:0005575 | 2 | 6.61E-06 | 19258830 | MAA_04544 | 1.27 | hypothetical protein MAA_04544                                   |
| GO:0005575 | 2 | 6.61E-06 | 19260869 | MAA_06583 | 1.29 | feruloyl esterase B                                              |
| GO:0005575 | 2 | 6.61E-06 | 19264070 | MAA_09784 | 1.34 | 16 kDa allergen                                                  |
| GO:0005575 | 2 | 6.61E-06 | 19255583 | MAA_01297 | 1.38 | haloacid dehalogenase                                            |
| GO:0005575 | 2 | 6.61E-06 | 19260837 | MAA_06551 | 1.39 | macrophomate synthase                                            |
| GO:0005575 | 2 | 6.61E-06 | 23632196 | MAA_10747 | 1.39 | ankyrin repeat protein                                           |
| GO:0005575 | 2 | 6.61E-06 | 23632364 | MAA_10915 | 1.41 | hypothetical protein MAA_10915                                   |
| GO:0005575 | 2 | 6.61E-06 | 19263023 | MAA_08737 | 1.42 | Beta-lactamase-like protein                                      |
| GO:0005575 | 2 | 6.61E-06 | 19254392 | MAA_00106 | 1.44 | F-box domain protein                                             |
| GO:0005575 | 2 | 6.61E-06 | 19264325 | MAA_10039 | 1.44 | subgroup IIIi aminotransferase                                   |
| GO:0005575 | 2 | 6.61E-06 | 19263202 | MAA_08916 | 1.45 | multicopper oxidase                                              |
| GO:0005575 | 2 | 6.61E-06 | 19254406 | MAA_00120 | 1.45 | Methyltransferase type 11                                        |
| GO:0005575 | 2 | 6.61E-06 | 19264066 | MAA_09780 | 1.45 | glycosyl transferase, group 2 family protein                     |
| GO:0005575 | 2 | 6.61E-06 | 19260260 | MAA_05974 | 1.46 | S-adenosylmethionine:tRNA ribosyltransferase-isomerase           |
| GO:0005575 | 2 | 6.61E-06 | 19264827 | MAA_10541 | 1.47 | hypothetical protein MAA_10541                                   |
| GO:0005575 | 2 | 6.61E-06 | 19263587 | MAA_09301 | 1.49 | F-box domain-containing protein                                  |
| GO:0005575 | 2 | 6.61E-06 | 19262651 | MAA_08365 | 1.51 | multicopper oxidase                                              |
| GO:0005575 | 2 | 6.61E-06 | 19258327 | MAA_04041 | 1.61 | hypothetical protein MAA_04041                                   |
| GO:0005575 | 2 | 6.61E-06 | 19256546 | MAA_02260 | 1.62 | sarcosine oxidase                                                |
| GO:0005575 | 2 | 6.61E-06 | 19260261 | MAA_05975 | 1.62 | (2R)-phospho-3-sulfolactate synthase, ComA                       |
| GO:0005575 | 2 | 6.61E-06 | 19263904 | MAA_09618 | 1.65 | CobW domain protein                                              |
| GO:0005575 | 2 | 6.61E-06 | 19264611 | MAA_10325 | 1.69 | Nitrilase/cyanide hydratase and apolipoprotein N-acyltransferase |
| GO:0005575 | 2 | 6.61E-06 | 19255639 | MAA_01353 | 1.69 | Oxoglutarate/iron-dependent oxygenase                            |
| GO:0005575 | 2 | 6.61E-06 | 23633070 | MAA_11622 | 1.71 | hypothetical protein MAA_11622                                   |
| GO:0005575 | 2 | 6.61E-06 | 19264142 | MAA_09856 | 1.72 | hypothetical protein MAA_09856                                   |
| GO:0005575 | 2 | 6.61E-06 | 19264386 | MAA_10100 | 1.72 | hypothetical protein MAA_10100                                   |
| GO:0005575 | 2 | 6.61E-06 | 19262890 | MAA_08604 | 1.74 | hypothetical protein MAA_08604                                   |
| GO:0005575 | 2 | 6.61E-06 | 19258065 | MAA_03779 | 1.79 | peptidylarginine deiminase-like enzyme                           |
| GO:0005575 | 2 | 6.61E-06 | 19262652 | MAA_08366 | 1.80 | methyltransferase [Metarhizium robertsii]                        |
| GO:0005575 | 2 | 6.61E-06 | 19262904 | MAA_08618 | 1.81 | Phytanoyl-CoA dioxygenase PhyH                                   |
| GO:0005575 | 2 | 6.61E-06 | 19255194 | MAA_00908 | 1.81 | might be a transmembrane protein                                 |
| GO:0005575 | 2 | 6.61E-06 | 19263545 | MAA_09259 | 1.84 | epoxidase subunit A                                              |
| GO:0005575 | 2 | 6.61E-06 | 19262906 | MAA_08620 | 1.84 | nmrA-like family protein                                         |
| GO:0005575 | 2 | 6.61E-06 | 19255954 | MAA_01668 | 1.84 | Phosphoesterase                                                  |
| GO:0005575 | 2 | 6.61E-06 | 19262903 | MAA_08617 | 1.87 | aromatic amino acid aminotransferase                             |
| GO:0005575 | 2 | 6.61E-06 | 19263645 | MAA_09359 | 1.89 | Pfs, NACHT and WD domain protein                                 |
| GO:0005575 | 2 | 6.61E-06 | 19263747 | MAA_09461 | 1.93 | carbohydrate-binding WSC domain protein                          |
| GO:0005575 | 2 | 6.61E-06 | 19257622 | MAA_03336 | 1.94 | Peptidase S8/S53, subtilisin/kexin/sedolisin                     |
| GO:0005575 | 2 | 6.61E-06 | 19262577 | MAA_08291 | 1.94 | sulfatase domain-containing protein                              |
| GO:0005575 | 2 | 6.61E-06 | 19264817 | MAA_10531 | 1.95 | Oxoglutarate/iron-dependent oxygenase                            |
| GO:0005575 | 2 | 6.61E-06 | 19258293 | MAA_04007 | 1.95 | alcohol dehydrogenase GroES domain-containing protein            |
| GO:0005575 | 2 | 6.61E-06 | 19262927 | MAA_08641 | 1.97 | sulfatase domain protein                                         |
| GO:0005575 | 2 | 6.61E-06 | 19264603 | MAA_10317 | 1.98 | pyridoxal-dependent decarboxylase domain protein                 |
| GO:0005575 | 2 | 6.61E-06 | 19263643 | MAA_09357 | 1.99 | hypothetical protein X797_010135                                 |
| GO:0005575 | 2 | 6.61E-06 | 19262974 | MAA_08688 | 2.00 | CFEM domain protein [Metarhizium robertsii]                      |
| GO:0005575 | 2 | 6.61E-06 | 19262655 | MAA_08369 | 2.07 | Dimeric alpha-beta barrel                                        |
| GO:0005575 | 2 | 6.61E-06 | 19264481 | MAA_10195 | 2.07 | Ctr copper transporter                                           |
| GO:0005575 | 2 | 6.61E-06 | 19260312 | MAA_06026 | 2.08 | phosphatidylserine decarboxylase family protein                  |

|            |   |          |          |           |        |                                                    |
|------------|---|----------|----------|-----------|--------|----------------------------------------------------|
| GO:0005575 | 2 | 6.61E-06 | 19262909 | MAA_08623 | 2.21   | phytanoyl-CoA dioxygenase                          |
| GO:0005575 | 2 | 6.61E-06 | 19264319 | MAA_10033 | 2.28   | polyketide synthase                                |
| GO:0005575 | 2 | 6.61E-06 | 19260992 | MAA_06706 | 2.30   | short-chain dehydrogenase                          |
| GO:0005575 | 2 | 6.61E-06 | 19262907 | MAA_08621 | 2.31   | f420-dependent NADP reductase                      |
| GO:0005575 | 2 | 6.61E-06 | 19258452 | MAA_04166 | 2.35   | DUF1275 domain protein                             |
| GO:0005575 | 2 | 6.61E-06 | 19264505 | MAA_10219 | 2.44   | FAD/FMN-containing isoamyl alcohol oxidase MreA    |
| GO:0005575 | 2 | 6.61E-06 | 23633189 | MAA_11741 | 2.75   | hypothetical protein MAA_11741                     |
| GO:0005575 | 2 | 6.61E-06 | 19258063 | MAA_03777 | 2.87   | Bys1 family protein                                |
| GO:0005575 | 2 | 6.61E-06 | 19255706 | MAA_01420 | 3.28   | hypothetical protein MAA_01420                     |
| GO:0005575 | 2 | 6.61E-06 | 19264610 | MAA_10324 | 3.62   | NmrA-like family protein                           |
| GO:0005575 | 2 | 6.61E-06 | 19255348 | MAA_01062 | 7.81   | hypothetical protein MAA_01062                     |
| GO:0005575 | 2 | 6.61E-06 | 19264488 | MAA_10202 | 14.39  | Beta-ketoacyl synthase                             |
| GO:0004252 | 8 | 4.41E-05 | 19263004 | MAA_08718 | -6.63  | Peptidase S8, subtilisin, Asp-active site protein  |
| GO:0004252 | 8 | 4.41E-05 | 19259961 | MAA_05675 | -4.48  | alkaline serine protease P32                       |
| GO:0004252 | 8 | 4.41E-05 | 23632468 | MAA_11020 | -3.77  | peptidase S1 domain protein                        |
| GO:0004252 | 8 | 4.41E-05 | 19263878 | MAA_09592 | -3.08  | Peptidase S1/S6, chymotrypsin/Hap                  |
| GO:0004252 | 8 | 4.41E-05 | 19257548 | MAA_03262 | -2.40  | Peptidase S1/S6, chymotrypsin/Hap                  |
| GO:0004252 | 8 | 4.41E-05 | 19262987 | MAA_08701 | -1.69  | subtilisin-like serine protease precursor          |
| GO:0004252 | 8 | 4.41E-05 | 19263922 | MAA_09636 | -1.21  | subtilisin-like protease                           |
| GO:0004252 | 8 | 4.41E-05 | 19255594 | MAA_01308 | -1.14  | Peptidase S8/S53, subtilisin/kexin/sedolisin       |
| GO:0004252 | 8 | 4.41E-05 | 19262454 | MAA_08168 | -1.03  | Peptidase S8, subtilisin-related protein           |
| GO:0004252 | 8 | 4.41E-05 | 19254778 | MAA_00492 | 1.28   | subtilisin-like protease                           |
| GO:0004252 | 8 | 4.41E-05 | 19257622 | MAA_03336 | 1.94   | Peptidase S8/S53, subtilisin/kexin/sedolisin       |
| GO:0004252 | 8 | 4.41E-05 | 19262821 | MAA_08535 | 11.37  | tripeptidyl peptidase a                            |
| GO:0042438 | 8 | 6.09E-05 | 19264708 | MAA_10422 | -3.24  | hypothetical protein MAA_10422                     |
| GO:0042438 | 8 | 6.09E-05 | 19257525 | MAA_03239 | -2.33  | Beta-ketoacyl synthase                             |
| GO:0042438 | 8 | 6.09E-05 | 19257527 | MAA_03241 | -1.82  | glutamyl-tRNA(Gln) amidotransferase                |
| GO:0042438 | 8 | 6.09E-05 | 19257526 | MAA_03240 | -3.79  | hypothetical protein MAA_03240                     |
| GO:0042438 | 8 | 6.09E-05 | 23632196 | MAA_10747 | 1.39   | ankyrin repeat protein                             |
| GO:0006508 | 7 | 1.65E-04 | 19263004 | MAA_08718 | -6.63  | Peptidase S8, subtilisin, Asp-active site protein  |
| GO:0006508 | 7 | 1.65E-04 | 19263490 | MAA_09204 | -5.66  | Concanavalin A-like lectin/glucanase               |
| GO:0006508 | 7 | 1.65E-04 | 19255283 | MAA_00997 | -4.09  | peptidase family M28                               |
| GO:0006508 | 7 | 1.65E-04 | 19255716 | MAA_01430 | -2.98  | Peptidase A1                                       |
| GO:0006508 | 7 | 1.65E-04 | 19262512 | MAA_08226 | -2.72  | Peptidase aspartic, active site protein            |
| GO:0006508 | 7 | 1.65E-04 | 23632201 | MAA_10752 | -1.74  | triacylglycerol lipase-like protein                |
| GO:0006508 | 7 | 1.65E-04 | 19255800 | MAA_01514 | -1.18  | Peptidase A1                                       |
| GO:0006508 | 7 | 1.65E-04 | 19255594 | MAA_01308 | -1.14  | Peptidase S8/S53, subtilisin/kexin/sedolisin       |
| GO:0006508 | 7 | 1.65E-04 | 19255772 | MAA_01486 | 1.11   | serine carboxypeptidase                            |
| GO:0006508 | 7 | 1.65E-04 | 19259511 | MAA_05225 | 1.12   | extracellular dipeptidyl-peptidase Dpp4            |
| GO:0006508 | 7 | 1.65E-04 | 19264818 | MAA_10532 | 1.23   | peptidase family M3                                |
| GO:0006508 | 7 | 1.65E-04 | 19257622 | MAA_03336 | 1.94   | Peptidase S8/S53, subtilisin/kexin/sedolisin       |
| GO:0006508 | 7 | 1.65E-04 | 19255985 | MAA_01699 | 2.40   | serin endopeptidase                                |
| GO:0006508 | 7 | 1.65E-04 | 19262821 | MAA_08535 | 11.37  | tripeptidyl peptidase a                            |
| GO:0005576 | 3 | 4.33E-04 | 19263004 | MAA_08718 | -6.63  | Peptidase S8, subtilisin, Asp-active site protein  |
| GO:0005576 | 3 | 4.33E-04 | 19263490 | MAA_09204 | -5.66  | Concanavalin A-like lectin/glucanase               |
| GO:0005576 | 3 | 4.33E-04 | 19262598 | MAA_08312 | -5.18  | cell wall protein                                  |
| GO:0005576 | 3 | 4.33E-04 | 19255283 | MAA_00997 | -4.09  | peptidase family M28                               |
| GO:0005576 | 3 | 4.33E-04 | 19260495 | MAA_06209 | -3.07  | Concanavalin A-like lectin/glucanase               |
| GO:0005576 | 3 | 4.33E-04 | 19256036 | MAA_01750 | -2.42  | bacterial-type extracellular deoxyribonuclease     |
| GO:0005576 | 3 | 4.33E-04 | 19262601 | MAA_08315 | -2.30  | Glycoside hydrolase, chitinase active site protein |
| GO:0005576 | 3 | 4.33E-04 | 19263527 | MAA_09241 | -2.28  | cysteine-rich secretory protein                    |
| GO:0005576 | 3 | 4.33E-04 | 19263304 | MAA_09018 | -1.80  | Glycoside hydrolase, subgroup, catalytic core      |
| GO:0005576 | 3 | 4.33E-04 | 19263052 | MAA_08766 | -1.67  | maltase                                            |
| GO:0005576 | 3 | 4.33E-04 | 19256453 | MAA_02167 | -1.51  | Glucoamylase, putative                             |
| GO:0005576 | 3 | 4.33E-04 | 19256971 | MAA_02685 | -1.44  | chitinase                                          |
| GO:0005576 | 3 | 4.33E-04 | 19259713 | MAA_05427 | -1.43  | LysM domain-containing protein                     |
| GO:0005576 | 3 | 4.33E-04 | 19261227 | MAA_06941 | -1.35  | extracellular serine-rich protein                  |
| GO:0005576 | 3 | 4.33E-04 | 19254294 | MAA_00008 | -1.27  | Alpha-L-arabinofuranosidase B, catalytic           |
| GO:0005576 | 3 | 4.33E-04 | 19254739 | MAA_00453 | -1.22  | Ribonuclease T2, active site protein               |
| GO:0005576 | 3 | 4.33E-04 | 19255772 | MAA_01486 | 1.11   | serine carboxypeptidase                            |
| GO:0000977 | 9 | 7.88E-04 | 23633117 | MAA_11669 | -13.77 | hypothetical protein MAA_11669                     |

|            |   |          |          |           |        |                                                 |
|------------|---|----------|----------|-----------|--------|-------------------------------------------------|
| GO:0000977 | 9 | 7.88E-04 | 19255215 | MAA_00929 | -2.17  | Ribonuclease H-like protein                     |
| GO:0000977 | 9 | 7.88E-04 | 23632363 | MAA_10914 | 1.00   | pol-like protein                                |
| GO:0000977 | 9 | 7.88E-04 | 23633175 | MAA_11727 | 1.08   | FluG domain-containing protein                  |
| GO:0000977 | 9 | 7.88E-04 | 19254667 | MAA_00381 | 1.11   | Ribonuclease H-like protein                     |
| GO:0000977 | 9 | 7.88E-04 | 19263392 | MAA_09106 | 1.12   | FluG domain-containing protein                  |
| GO:0000977 | 9 | 7.88E-04 | 19264446 | MAA_10160 | 1.20   | transposase-like protein                        |
| GO:0000977 | 9 | 7.88E-04 | 19264853 | MAA_10567 | 1.42   | restless-like transposase                       |
| GO:0051213 | 5 | 8.23E-04 | 19259775 | MAA_05489 | -2.03  | Oxoglutarate/iron-dependent oxygenase           |
| GO:0051213 | 5 | 8.23E-04 | 19258127 | MAA_03841 | -1.18  | Cytochrome P450 CYP6003A1                       |
| GO:0051213 | 5 | 8.23E-04 | 19259541 | MAA_05255 | -1.14  | isopenicillin N synthase-like protein           |
| GO:0051213 | 5 | 8.23E-04 | 19262904 | MAA_08618 | 1.81   | Phytanoyl-CoA dioxygenase PhyH                  |
| GO:0051213 | 5 | 8.23E-04 | 19262909 | MAA_08623 | 2.21   | phytanoyl-CoA dioxygenase                       |
| GO:0031177 | 6 | 1.10E-03 | 19261030 | MAA_06744 | -9.56  | lysergyl peptide synthetase subunit 3 LPS3      |
| GO:0031177 | 6 | 1.10E-03 | 19262985 | MAA_08699 | -8.86  | Beta-ketoacyl synthase                          |
| GO:0031177 | 6 | 1.10E-03 | 19260861 | MAA_06575 | -4.95  | Beta-ketoacyl synthase                          |
| GO:0031177 | 6 | 1.10E-03 | 19257525 | MAA_03239 | -2.33  | Beta-ketoacyl synthase                          |
| GO:0031177 | 6 | 1.10E-03 | 23633221 | MAA_11773 | -1.72  | hypothetical protein MAA_11773                  |
| GO:0031177 | 6 | 1.10E-03 | 19259756 | MAA_05470 | -1.30  | transferase family protein                      |
| GO:0031177 | 6 | 1.10E-03 | 23632196 | MAA_10747 | 1.39   | ankyrin repeat protein                          |
| GO:0031177 | 6 | 1.10E-03 | 19262652 | MAA_08366 | 1.80   | methyltransferase                               |
| GO:0019829 | 8 | 1.51E-03 | 19259842 | MAA_05556 | -2.72  | potassium/sodium efflux P-type ATPase           |
| GO:0019829 | 8 | 1.51E-03 | 19264010 | MAA_09724 | -1.37  | ATPase, P-type, potassium/sodium efflux, fungal |
| GO:0019829 | 8 | 1.51E-03 | 19259102 | MAA_04816 | -1.08  | cation transporting ATPase                      |
| GO:0019829 | 8 | 1.51E-03 | 19264538 | MAA_10252 | -1.02  | magnesium-translocating P-type ATPase           |
| GO:0004668 | 7 | 1.51E-03 | 19259268 | MAA_04982 | -4.36  | protein-arginine deiminase type-4               |
| GO:0004668 | 7 | 1.51E-03 | 19262135 | MAA_07849 | -3.25  | protein-arginine deiminase type-4               |
| GO:0004668 | 7 | 1.51E-03 | 19254780 | MAA_00494 | 1.36   | protein-arginine deiminase type-4               |
| GO:0004668 | 7 | 1.51E-03 | 19258065 | MAA_03779 | 1.79   | peptidylarginine deiminase-like enzyme          |
| GO:0005623 | 3 | 2.47E-03 | 19259268 | MAA_04982 | -4.36  | protein-arginine deiminase type-4               |
| GO:0005623 | 3 | 2.47E-03 | 19254780 | MAA_00494 | 1.36   | protein-arginine deiminase type-4               |
| GO:1900815 | 7 | 2.62E-03 | 19260861 | MAA_06575 | -4.95  | Beta-ketoacyl synthase                          |
| GO:1900815 | 7 | 2.62E-03 | 19264708 | MAA_10422 | -3.24  | hypothetical protein MAA_10422                  |
| GO:1900815 | 7 | 2.62E-03 | 19257527 | MAA_03241 | -1.82  | glutamyl-tRNA(Gln) amidotransferase             |
| GO:1900815 | 7 | 2.62E-03 | 19262652 | MAA_08366 | 1.80   | methyltransferase [Metarhizium robertsii]       |
| GO:1900815 | 7 | 2.62E-03 | 19262655 | MAA_08369 | 2.07   | Dimeric alpha-beta barrel                       |
| GO:1900815 | 7 | 2.62E-03 | 19264488 | MAA_10202 | 14.39  | Beta-ketoacyl synthase                          |
| GO:0016614 | 5 | 3.12E-03 | 19263838 | MAA_09552 | -3.11  | FAD-binding, type 2                             |
| GO:0016614 | 5 | 3.12E-03 | 19254343 | MAA_00057 | -1.53  | choline dehydrogenase                           |
| GO:0016614 | 5 | 3.12E-03 | 19255901 | MAA_01615 | -1.48  | glucose oxidase                                 |
| GO:0016614 | 5 | 3.12E-03 | 23632270 | MAA_10821 | -1.03  | ubiquitin-conjugating enzyme                    |
| GO:0016614 | 5 | 3.12E-03 | 19264018 | MAA_09732 | 1.02   | Aldo/keto reductase                             |
| GO:0006357 | 9 | 3.45E-03 | 23633117 | MAA_11669 | -13.77 | hypothetical protein MAA_11669                  |
| GO:0006357 | 9 | 3.45E-03 | 23633036 | MAA_11588 | -9.96  | SET domain protein                              |
| GO:0006357 | 9 | 3.45E-03 | 19255215 | MAA_00929 | -2.17  | Ribonuclease H-like protein                     |
| GO:0006357 | 9 | 3.45E-03 | 19260324 | MAA_06038 | -1.57  | pH regulatory protein mrPacC                    |
| GO:0006357 | 9 | 3.45E-03 | 23632363 | MAA_10914 | 1.00   | pol-like protein                                |
| GO:0006357 | 9 | 3.45E-03 | 23633175 | MAA_11727 | 1.08   | FluG domain-containing protein                  |
| GO:0006357 | 9 | 3.45E-03 | 19254667 | MAA_00381 | 1.11   | Ribonuclease H-like protein                     |
| GO:0006357 | 9 | 3.45E-03 | 19263392 | MAA_09106 | 1.12   | FluG domain-containing protein                  |
| GO:0006357 | 9 | 3.45E-03 | 19264446 | MAA_10160 | 1.20   | transposase-like protein                        |
| GO:0006357 | 9 | 3.45E-03 | 19264853 | MAA_10567 | 1.42   | restless-like transposase                       |
| GO:0004190 | 8 | 3.73E-03 | 19263490 | MAA_09204 | -5.66  | Concanavalin A-like lectin/glucanase            |
| GO:0004190 | 8 | 3.73E-03 | 19260495 | MAA_06209 | -3.07  | Concanavalin A-like lectin/glucanase            |
| GO:0004190 | 8 | 3.73E-03 | 19255716 | MAA_01430 | -2.98  | Peptidase A1                                    |
| GO:0004190 | 8 | 3.73E-03 | 19262512 | MAA_08226 | -2.72  | Peptidase aspartic, active site protein         |
| GO:0004190 | 8 | 3.73E-03 | 23632201 | MAA_10752 | -1.74  | triacylglycerol lipase-like protein             |
| GO:0004190 | 8 | 3.73E-03 | 19255800 | MAA_01514 | -1.18  | Peptidase A1                                    |
| GO:0016747 | 6 | 3.85E-03 | 19262985 | MAA_08699 | -8.86  | Beta-ketoacyl synthase                          |
| GO:0016747 | 6 | 3.85E-03 | 23633221 | MAA_11773 | -1.72  | hypothetical protein MAA_11773                  |
| GO:0016747 | 6 | 3.85E-03 | 19259418 | MAA_05132 | -1.66  | NAD(P)-binding protein                          |
| GO:0016747 | 6 | 3.85E-03 | 19259756 | MAA_05470 | -1.30  | transferase family protein                      |

|            |   |          |          |           |       |                                                        |
|------------|---|----------|----------|-----------|-------|--------------------------------------------------------|
| GO:0016747 | 6 | 3.85E-03 | 19263692 | MAA_09406 | 1.17  | hypothetical protein MAA_09406                         |
| GO:0016747 | 6 | 3.85E-03 | 19258293 | MAA_04007 | 1.95  | alcohol dehydrogenase GroES domain-containing protein  |
| GO:0016747 | 6 | 3.85E-03 | 19264319 | MAA_10033 | 2.28  | polyketide synthase                                    |
| GO:0016747 | 6 | 3.85E-03 | 19264488 | MAA_10202 | 14.39 | Beta-ketoacyl synthase                                 |
| GO:0008236 | 6 | 4.06E-03 | 19255594 | MAA_01308 | -1.14 | Peptidase S8/S53, subtilisin/kexin/sedolisin           |
| GO:0008236 | 6 | 4.06E-03 | 19259511 | MAA_05225 | 1.12  | extracellular dipeptidyl-peptidase Dpp4                |
| GO:0008236 | 6 | 4.06E-03 | 19257622 | MAA_03336 | 1.94  | Peptidase S8/S53, subtilisin/kexin/sedolisin           |
| GO:0008236 | 6 | 4.06E-03 | 19262821 | MAA_08535 | 11.37 | tripeptidyl peptidase a                                |
| GO:0003824 | 3 | 4.39E-03 | 19261030 | MAA_06744 | -9.56 | lysergyl peptide synthetase subunit 3 LPS3             |
| GO:0003824 | 3 | 4.39E-03 | 19262985 | MAA_08699 | -8.86 | Beta-ketoacyl synthase                                 |
| GO:0003824 | 3 | 4.39E-03 | 19262115 | MAA_07829 | -4.38 | WD40 repeat-like-containing domain protein             |
| GO:0003824 | 3 | 4.39E-03 | 19263074 | MAA_08788 | -3.60 | ankyrin repeat-containing protein                      |
| GO:0003824 | 3 | 4.39E-03 | 19254732 | MAA_00446 | -1.97 | NADPH dehydrogenase                                    |
| GO:0003824 | 3 | 4.39E-03 | 19264518 | MAA_10232 | -1.88 | ankyrin repeat containing protein                      |
| GO:0003824 | 3 | 4.39E-03 | 23633221 | MAA_11773 | -1.72 | hypothetical protein MAA_11773                         |
| GO:0003824 | 3 | 4.39E-03 | 19254338 | MAA_00052 | -1.71 | Nucleoside phosphorylase domain protein                |
| GO:0003824 | 3 | 4.39E-03 | 19264674 | MAA_10388 | -1.57 | Glyoxalase/bleomycin resistance protein/dioxygenase    |
| GO:0003824 | 3 | 4.39E-03 | 19264329 | MAA_10043 | -1.49 | destruxin synthetase, DtxS1                            |
| GO:0003824 | 3 | 4.39E-03 | 19259756 | MAA_05470 | -1.30 | transferase family protein                             |
| GO:0003824 | 3 | 4.39E-03 | 19262192 | MAA_07906 | -1.15 | Alpha-hydroxy acid dehydrogenase, FMN-dependent        |
| GO:0003824 | 3 | 4.39E-03 | 19255698 | MAA_01412 | -1.06 | Ankyrin repeat-containing domain protein               |
| GO:0003824 | 3 | 4.39E-03 | 19263888 | MAA_09602 | 1.16  | Six-hairpin glycosidase                                |
| GO:0003824 | 3 | 4.39E-03 | 19263977 | MAA_09691 | 1.17  | 1-aminocyclopropane-1-carboxylate synthase             |
| GO:0003824 | 3 | 4.39E-03 | 19259110 | MAA_04824 | 1.23  | non-ribosomal peptide synthetase                       |
| GO:0003824 | 3 | 4.39E-03 | 19260837 | MAA_06551 | 1.39  | macrophomate synthase                                  |
| GO:0003824 | 3 | 4.39E-03 | 19264325 | MAA_10039 | 1.44  | subgroup IIIi aminotransferase                         |
| GO:0003824 | 3 | 4.39E-03 | 19260261 | MAA_05975 | 1.62  | (2R)-phospho-3-sulfolactate synthase, ComA             |
| GO:0003824 | 3 | 4.39E-03 | 19262652 | MAA_08366 | 1.80  | methyltransferase [Metarhizium robertsii]              |
| GO:0003824 | 3 | 4.39E-03 | 19262903 | MAA_08617 | 1.87  | aromatic amino acid aminotransferase                   |
| GO:0003824 | 3 | 4.39E-03 | 19262577 | MAA_08291 | 1.94  | sulfatase domain-containing protein                    |
| GO:0003824 | 3 | 4.39E-03 | 19262927 | MAA_08641 | 1.97  | sulfatase domain protein                               |
| GO:0003824 | 3 | 4.39E-03 | 19264603 | MAA_10317 | 1.98  | pyridoxal-dependent decarboxylase domain protein       |
| GO:0003824 | 3 | 4.39E-03 | 19264319 | MAA_10033 | 2.28  | polyketide synthase                                    |
| GO:0003824 | 3 | 4.39E-03 | 19264488 | MAA_10202 | 14.39 | Beta-ketoacyl synthase                                 |
| GO:0019748 | 4 | 4.61E-03 | 19261030 | MAA_06744 | -9.56 | lysergyl peptide synthetase subunit 3 LPS3             |
| GO:0019748 | 4 | 4.61E-03 | 19262985 | MAA_08699 | -8.86 | Beta-ketoacyl synthase                                 |
| GO:0019748 | 4 | 4.61E-03 | 19260861 | MAA_06575 | -4.95 | Beta-ketoacyl synthase                                 |
| GO:0019748 | 4 | 4.61E-03 | 23633221 | MAA_11773 | -1.72 | hypothetical protein MAA_11773                         |
| GO:0019748 | 4 | 4.61E-03 | 19264329 | MAA_10043 | -1.49 | destruxin synthetase, DtxS1                            |
| GO:0019748 | 4 | 4.61E-03 | 19259541 | MAA_05255 | -1.14 | isopenicillin N synthase-like protein                  |
| GO:0019748 | 4 | 4.61E-03 | 23632270 | MAA_10821 | -1.03 | ubiquitin-conjugating enzyme                           |
| GO:0019748 | 4 | 4.61E-03 | 19263169 | MAA_08883 | 1.31  | FAD binding domain-containing protein                  |
| GO:0019748 | 4 | 4.61E-03 | 19264319 | MAA_10033 | 2.28  | polyketide synthase                                    |
| GO:0019748 | 4 | 4.61E-03 | 19264488 | MAA_10202 | 14.39 | Beta-ketoacyl synthase                                 |
| GO:0005615 | 4 | 4.76E-03 | 19255619 | MAA_01333 | -4.06 | carboxypeptidase, partial                              |
| GO:0005615 | 4 | 4.76E-03 | 19256231 | MAA_01945 | -3.30 | fungalsin metallopeptidase                             |
| GO:0005615 | 4 | 4.76E-03 | 19263527 | MAA_09241 | -2.28 | cysteine-rich secretory protein                        |
| GO:0005615 | 4 | 4.76E-03 | 19262271 | MAA_07985 | -1.09 | carboxylesterase/lipase domain protein                 |
| GO:0005615 | 4 | 4.76E-03 | 19262240 | MAA_07954 | 1.31  | hypothetical protein MAA_07954                         |
| GO:2001307 | 7 | 5.67E-03 | 19255257 | MAA_00971 | -4.81 | Aromatic prenyltransferase, DMATS type                 |
| GO:2001307 | 7 | 5.67E-03 | 19257527 | MAA_03241 | -1.82 | glutamyl-tRNA(Gln) amidotransferase                    |
| GO:2001307 | 7 | 5.67E-03 | 19264708 | MAA_10422 | -3.24 | hypothetical protein MAA_10422                         |
| GO:0016740 | 4 | 6.11E-03 | 19262985 | MAA_08699 | -8.86 | Beta-ketoacyl synthase                                 |
| GO:0016740 | 4 | 6.11E-03 | 19257525 | MAA_03239 | -2.33 | Beta-ketoacyl synthase                                 |
| GO:0016740 | 4 | 6.11E-03 | 23633221 | MAA_11773 | -1.72 | hypothetical protein MAA_11773                         |
| GO:0016740 | 4 | 6.11E-03 | 23632196 | MAA_10747 | 1.39  | ankyrin repeat protein                                 |
| GO:0016740 | 4 | 6.11E-03 | 19260260 | MAA_05974 | 1.46  | S-adenosylmethionine:tRNA ribosyltransferase-isomerase |
| GO:0016740 | 4 | 6.11E-03 | 19262652 | MAA_08366 | 1.80  | methyltransferase [Metarhizium robertsii]              |
| GO:0016740 | 4 | 6.11E-03 | 19264319 | MAA_10033 | 2.28  | polyketide synthase                                    |
| GO:0016740 | 4 | 6.11E-03 | 19264488 | MAA_10202 | 14.39 | Beta-ketoacyl synthase                                 |
| GO:0055114 | 4 | 6.63E-03 | 19262985 | MAA_08699 | -8.86 | Beta-ketoacyl synthase                                 |

|            |    |          |          |           |       |                                                       |
|------------|----|----------|----------|-----------|-------|-------------------------------------------------------|
| GO:0055114 | 4  | 6.63E-03 | 19263838 | MAA_09552 | -3.11 | FAD-binding, type 2                                   |
| GO:0055114 | 4  | 6.63E-03 | 23632897 | MAA_11449 | -2.96 | Ankyrin repeat-containing domain protein              |
| GO:0055114 | 4  | 6.63E-03 | 19259153 | MAA_04867 | -2.08 | Pyridine nucleotide-disulfide oxidoreductase          |
| GO:0055114 | 4  | 6.63E-03 | 19254732 | MAA_00446 | -1.97 | NADPH dehydrogenase                                   |
| GO:0055114 | 4  | 6.63E-03 | 19264330 | MAA_10044 | -1.78 | Cytochrome P450, DtxS2                                |
| GO:0055114 | 4  | 6.63E-03 | 19261778 | MAA_07492 | -1.78 | c6 zinc finger domain containing protein              |
| GO:0055114 | 4  | 6.63E-03 | 23633221 | MAA_11773 | -1.72 | hypothetical protein MAA_11773                        |
| GO:0055114 | 4  | 6.63E-03 | 19263800 | MAA_09514 | -1.67 | Cytochrome P450 CYP58S1                               |
| GO:0055114 | 4  | 6.63E-03 | 19259418 | MAA_05132 | -1.66 | NAD(P)-binding protein                                |
| GO:0055114 | 4  | 6.63E-03 | 19261793 | MAA_07507 | -1.59 | Pyoverdine biosynthesis                               |
| GO:0055114 | 4  | 6.63E-03 | 19254343 | MAA_00057 | -1.53 | choline dehydrogenase                                 |
| GO:0055114 | 4  | 6.63E-03 | 19255901 | MAA_01615 | -1.48 | glucose oxidase                                       |
| GO:0055114 | 4  | 6.63E-03 | 19263128 | MAA_08842 | -1.45 | NAD(P)-binding domain protein                         |
| GO:0055114 | 4  | 6.63E-03 | 19263848 | MAA_09562 | -1.18 | fatty acid hydroxylase superfamily protein            |
| GO:0055114 | 4  | 6.63E-03 | 19258127 | MAA_03841 | -1.18 | Cytochrome P450 CYP6003A1                             |
| GO:0055114 | 4  | 6.63E-03 | 23632270 | MAA_10821 | -1.03 | ubiquitin-conjugating enzyme                          |
| GO:0055114 | 4  | 6.63E-03 | 19263978 | MAA_09692 | 1.04  | Oxoglutarate/iron-dependent oxygenase                 |
| GO:0055114 | 4  | 6.63E-03 | 19259242 | MAA_04956 | 1.07  | Amine oxidase                                         |
| GO:0055114 | 4  | 6.63E-03 | 19262824 | MAA_08538 | 1.13  | 3-hydroxyacid dehydrogenase/reductase                 |
| GO:0055114 | 4  | 6.63E-03 | 19263692 | MAA_09406 | 1.17  | hypothetical protein MAA_09406                        |
| GO:0055114 | 4  | 6.63E-03 | 19264577 | MAA_10291 | 1.32  | cyclopentanone 1,2-monooxygenase                      |
| GO:0055114 | 4  | 6.63E-03 | 19261170 | MAA_06884 | 1.36  | Aldehyde dehydrogenase                                |
| GO:0055114 | 4  | 6.63E-03 | 19263202 | MAA_08916 | 1.45  | multicopper oxidase                                   |
| GO:0055114 | 4  | 6.63E-03 | 19256546 | MAA_02260 | 1.62  | sarcosine oxidase                                     |
| GO:0055114 | 4  | 6.63E-03 | 19255639 | MAA_01353 | 1.69  | Oxoglutarate/iron-dependent oxygenase                 |
| GO:0055114 | 4  | 6.63E-03 | 19263874 | MAA_09588 | 1.89  | TfdA family Taurine catabolism dioxygenase TauD       |
| GO:0055114 | 4  | 6.63E-03 | 19264817 | MAA_10531 | 1.95  | Oxoglutarate/iron-dependent oxygenase                 |
| GO:0055114 | 4  | 6.63E-03 | 19258293 | MAA_04007 | 1.95  | alcohol dehydrogenase GroES domain-containing protein |
| GO:0055114 | 4  | 6.63E-03 | 19262218 | MAA_07932 | 2.17  | Pyruvate/2-oxoglutarate dehydrogenase                 |
| GO:0055114 | 4  | 6.63E-03 | 19264319 | MAA_10033 | 2.28  | polyketide synthase                                   |
| GO:0055114 | 4  | 6.63E-03 | 19264505 | MAA_10219 | 2.44  | FAD/FMN-containing isoamyl alcohol oxidase MreA       |
| GO:0051974 | 8  | 6.92E-03 | 23633205 | MAA_11757 | 1.07  | hypothetical protein MAA_11757                        |
| GO:0032211 | 12 | 6.92E-03 | 23633205 | MAA_11757 | 1.07  | hypothetical protein MAA_11757                        |
| GO:0051974 | 8  | 6.92E-03 | 19263390 | MAA_09104 | 1.10  | aaa ATPase                                            |
| GO:0032211 | 12 | 6.92E-03 | 19263390 | MAA_09104 | 1.10  | aaa ATPase                                            |
| GO:0051974 | 8  | 6.92E-03 | 19264434 | MAA_10148 | 1.13  | ATP-dependent DNA helicase PIF1                       |
| GO:0032211 | 12 | 6.92E-03 | 19264434 | MAA_10148 | 1.13  | ATP-dependent DNA helicase PIF1                       |
| GO:0051974 | 8  | 6.92E-03 | 19264635 | MAA_10349 | 1.28  | ATP-dependent DNA helicase PIF1                       |
| GO:0032211 | 12 | 6.92E-03 | 19264635 | MAA_10349 | 1.28  | ATP-dependent DNA helicase PIF1                       |
| GO:0051974 | 8  | 6.92E-03 | 19254648 | MAA_00362 | 1.35  | PIF1 protein                                          |
| GO:0032211 | 12 | 6.92E-03 | 19254648 | MAA_00362 | 1.35  | PIF1 protein                                          |
| GO:0044806 | 9  | 6.92E-03 | 23633205 | MAA_11757 | 1.07  | hypothetical protein MAA_11757                        |
| GO:0044806 | 9  | 6.92E-03 | 19263390 | MAA_09104 | 1.10  | aaa ATPase                                            |
| GO:0044806 | 9  | 6.92E-03 | 19264434 | MAA_10148 | 1.13  | ATP-dependent DNA helicase PIF1                       |
| GO:0044806 | 9  | 6.92E-03 | 19264635 | MAA_10349 | 1.28  | ATP-dependent DNA helicase PIF1                       |
| GO:0044806 | 9  | 6.92E-03 | 19254648 | MAA_00362 | 1.35  | PIF1 protein                                          |
| GO:0016491 | 4  | 7.11E-03 | 19262985 | MAA_08699 | -8.86 | Beta-ketoacyl synthase                                |
| GO:0016491 | 4  | 7.11E-03 | 23632897 | MAA_11449 | -2.96 | Ankyrin repeat-containing domain protein              |
| GO:0016491 | 4  | 7.11E-03 | 19264234 | MAA_09948 | -2.13 | nitroreductase protein                                |
| GO:0016491 | 4  | 7.11E-03 | 19259153 | MAA_04867 | -2.08 | Pyridine nucleotide-disulfide oxidoreductase          |
| GO:0016491 | 4  | 7.11E-03 | 19254732 | MAA_00446 | -1.97 | NADPH dehydrogenase                                   |
| GO:0016491 | 4  | 7.11E-03 | 19260857 | MAA_06571 | -1.95 | NAD(P)-binding domain protein                         |
| GO:0016491 | 4  | 7.11E-03 | 23633221 | MAA_11773 | -1.72 | hypothetical protein MAA_11773                        |
| GO:0016491 | 4  | 7.11E-03 | 19259418 | MAA_05132 | -1.66 | NAD(P)-binding protein                                |
| GO:0016491 | 4  | 7.11E-03 | 19261793 | MAA_07507 | -1.59 | Pyoverdine biosynthesis                               |
| GO:0016491 | 4  | 7.11E-03 | 19254364 | MAA_00078 | -1.39 | FAD dependent monooxygenase                           |
| GO:0016491 | 4  | 7.11E-03 | 19263848 | MAA_09562 | -1.18 | fatty acid hydroxylase superfamily protein            |
| GO:0016491 | 4  | 7.11E-03 | 19262192 | MAA_07906 | -1.15 | Alpha-hydroxy acid dehydrogenase, FMN-dependent       |
| GO:0016491 | 4  | 7.11E-03 | 23632270 | MAA_10821 | -1.03 | ubiquitin-conjugating enzyme                          |
| GO:0016491 | 4  | 7.11E-03 | 19262673 | MAA_08387 | 1.06  | short-chain dehydrogenase                             |
| GO:0016491 | 4  | 7.11E-03 | 19259242 | MAA_04956 | 1.07  | Amine oxidase                                         |

|            |    |          |          |           |       |                                                                     |
|------------|----|----------|----------|-----------|-------|---------------------------------------------------------------------|
| GO:0016491 | 4  | 7.11E-03 | 19263497 | MAA_09211 | 1.19  | hypothetical protein MAA_09211                                      |
| GO:0016491 | 4  | 7.11E-03 | 19256546 | MAA_02260 | 1.62  | sarcosine oxidase                                                   |
| GO:0016491 | 4  | 7.11E-03 | 19255639 | MAA_01353 | 1.69  | Oxoglutarate/iron-dependent oxygenase                               |
| GO:0016491 | 4  | 7.11E-03 | 19258293 | MAA_04007 | 1.95  | alcohol dehydrogenase GroES domain-containing protein               |
| GO:0016491 | 4  | 7.11E-03 | 19262218 | MAA_07932 | 2.17  | Pyruvate/2-oxoglutarate dehydrogenase                               |
| GO:0016491 | 4  | 7.11E-03 | 19264319 | MAA_10033 | 2.28  | polyketide synthase                                                 |
| GO:0016491 | 4  | 7.11E-03 | 19260992 | MAA_06706 | 2.30  | short-chain dehydrogenase                                           |
| GO:0016491 | 4  | 7.11E-03 | 19264505 | MAA_10219 | 2.44  | FAD/FMN-containing isoamyl alcohol oxidase MreA                     |
| GO:0009395 | 8  | 7.16E-03 | 19259306 | MAA_05020 | -1.25 | phospholipase-like protein                                          |
| GO:0009395 | 8  | 7.16E-03 | 19260910 | MAA_06624 | -1.11 | lysophospholipase precursor                                         |
| GO:0016708 | 6  | 7.16E-03 | 19261778 | MAA_07492 | -1.78 | c6 zinc finger domain containing protein                            |
| GO:0016708 | 6  | 7.16E-03 | 23632897 | MAA_11449 | -2.96 | Ankyrin repeat-containing domain protein                            |
| GO:0031638 | 9  | 7.16E-03 | 19260495 | MAA_06209 | -3.07 | Concanavalin A-like lectin/glucanase                                |
| GO:0031638 | 9  | 7.16E-03 | 19263490 | MAA_09204 | -5.66 | Concanavalin A-like lectin/glucanase                                |
| GO:0046148 | 5  | 8.20E-03 | 19257525 | MAA_03239 | -2.33 | Beta-ketoacyl synthase                                              |
| GO:0046148 | 5  | 8.20E-03 | 19257527 | MAA_03241 | -1.82 | glutamyl-tRNA(Gln) amidotransferase                                 |
| GO:0046148 | 5  | 8.20E-03 | 23632196 | MAA_10747 | 1.39  | ankyrin repeat protein                                              |
| GO:0010521 | 6  | 8.22E-03 | 23633205 | MAA_11757 | 1.07  | hypothetical protein MAA_11757                                      |
| GO:0010521 | 6  | 8.22E-03 | 19263390 | MAA_09104 | 1.10  | aaa ATPase                                                          |
| GO:0010521 | 6  | 8.22E-03 | 19264434 | MAA_10148 | 1.13  | ATP-dependent DNA helicase PIF1                                     |
| GO:0010521 | 6  | 8.22E-03 | 19264635 | MAA_10349 | 1.28  | ATP-dependent DNA helicase PIF1                                     |
| GO:0010521 | 6  | 8.22E-03 | 19254648 | MAA_00362 | 1.35  | PIF1 protein                                                        |
| GO:0005657 | 6  | 9.69E-03 | 23633205 | MAA_11757 | 1.07  | hypothetical protein MAA_11757                                      |
| GO:0005657 | 6  | 9.69E-03 | 19263390 | MAA_09104 | 1.10  | aaa ATPase                                                          |
| GO:0005657 | 6  | 9.69E-03 | 19264434 | MAA_10148 | 1.13  | ATP-dependent DNA helicase PIF1                                     |
| GO:0005657 | 6  | 9.69E-03 | 19264635 | MAA_10349 | 1.28  | ATP-dependent DNA helicase PIF1                                     |
| GO:0005657 | 6  | 9.69E-03 | 19254648 | MAA_00362 | 1.35  | PIF1 protein                                                        |
| GO:0030163 | 7  | 9.69E-03 | 19263004 | MAA_08718 | -6.63 | Peptidase S8, subtilisin, Asp-active site protein                   |
| GO:0030163 | 7  | 9.69E-03 | 19255716 | MAA_01430 | -2.98 | Peptidase A1                                                        |
| GO:0030163 | 7  | 9.69E-03 | 19262512 | MAA_08226 | -2.72 | Peptidase aspartic, active site protein                             |
| GO:0030163 | 7  | 9.69E-03 | 23632201 | MAA_10752 | -1.74 | triacylglycerol lipase-like protein                                 |
| GO:0030163 | 7  | 9.69E-03 | 19255800 | MAA_01514 | -1.18 | Peptidase A1                                                        |
| GO:0043141 | 12 | 1.13E-02 | 19254648 | MAA_00362 | 1.35  | PIF1 protein                                                        |
| GO:0043141 | 12 | 1.13E-02 | 19263390 | MAA_09104 | 1.10  | aaa ATPase                                                          |
| GO:0043141 | 12 | 1.13E-02 | 19264434 | MAA_10148 | 1.13  | ATP-dependent DNA helicase PIF1                                     |
| GO:0043141 | 12 | 1.13E-02 | 19264635 | MAA_10349 | 1.28  | ATP-dependent DNA helicase PIF1                                     |
| GO:0043141 | 12 | 1.13E-02 | 23633205 | MAA_11757 | 1.07  | hypothetical protein MAA_11757                                      |
| GO:1900563 | 6  | 1.29E-02 | 19254364 | MAA_00078 | -1.39 | FAD dependent monooxygenase                                         |
| GO:1900563 | 6  | 1.29E-02 | 19262652 | MAA_08366 | 1.80  | methyltransferase [Metarhizium robertsii]                           |
| GO:1900563 | 6  | 1.29E-02 | 19262904 | MAA_08618 | 1.81  | Phytanoyl-CoA dioxygenase PhyH                                      |
| GO:1900563 | 6  | 1.29E-02 | 19262909 | MAA_08623 | 2.21  | phytanoyl-CoA dioxygenase                                           |
| GO:1900560 | 6  | 1.29E-02 | 19254364 | MAA_00078 | -1.39 | FAD dependent monooxygenase                                         |
| GO:1900560 | 6  | 1.29E-02 | 19262652 | MAA_08366 | 1.80  | methyltransferase [Metarhizium robertsii]                           |
| GO:1900560 | 6  | 1.29E-02 | 19262904 | MAA_08618 | 1.81  | Phytanoyl-CoA dioxygenase PhyH                                      |
| GO:1900560 | 6  | 1.29E-02 | 19262909 | MAA_08623 | 2.21  | phytanoyl-CoA dioxygenase                                           |
| GO:0019439 | 6  | 1.39E-02 | 19261778 | MAA_07492 | -1.78 | c6 zinc finger domain containing protein                            |
| GO:0019439 | 6  | 1.39E-02 | 23632897 | MAA_11449 | -2.96 | Ankyrin repeat-containing domain protein                            |
| GO:0060003 | 12 | 1.39E-02 | 19264416 | MAA_10130 | -1.09 | Major facilitator superfamily domain, general substrate transporter |
| GO:0060003 | 12 | 1.39E-02 | 23632275 | MAA_10826 | -1.04 | meiotic recombination protein DMC1                                  |
| GO:0005618 | 5  | 1.39E-02 | 19264559 | MAA_10273 | -4.71 | Asparaginase/glutaminase                                            |
| GO:0005618 | 5  | 1.39E-02 | 19259838 | MAA_05552 | 1.24  | ribosomal protein L1                                                |
| GO:0008812 | 6  | 1.39E-02 | 19254343 | MAA_00057 | -1.53 | choline dehydrogenase                                               |
| GO:0008812 | 6  | 1.39E-02 | 19255901 | MAA_01615 | -1.48 | glucose oxidase                                                     |
| GO:0032508 | 9  | 1.51E-02 | 23633205 | MAA_11757 | 1.07  | hypothetical protein MAA_11757                                      |
| GO:0032508 | 9  | 1.51E-02 | 19263390 | MAA_09104 | 1.10  | aaa ATPase                                                          |
| GO:0032508 | 9  | 1.51E-02 | 19264434 | MAA_10148 | 1.13  | ATP-dependent DNA helicase PIF1                                     |
| GO:0032508 | 9  | 1.51E-02 | 19264635 | MAA_10349 | 1.28  | ATP-dependent DNA helicase PIF1                                     |
| GO:0032508 | 9  | 1.51E-02 | 19254648 | MAA_00362 | 1.35  | PIF1 protein                                                        |
| GO:0006260 | 8  | 1.73E-02 | 23633205 | MAA_11757 | 1.07  | hypothetical protein MAA_11757                                      |
| GO:0006260 | 8  | 1.73E-02 | 19263390 | MAA_09104 | 1.10  | aaa ATPase                                                          |
| GO:0006260 | 8  | 1.73E-02 | 19264434 | MAA_10148 | 1.13  | ATP-dependent DNA helicase PIF1                                     |

|            |    |          |          |           |        |                                                                     |
|------------|----|----------|----------|-----------|--------|---------------------------------------------------------------------|
| GO:0006260 | 8  | 1.73E-02 | 19264635 | MAA_10349 | 1.28   | ATP-dependent DNA helicase PIF1                                     |
| GO:0006260 | 8  | 1.73E-02 | 19254648 | MAA_00362 | 1.35   | PIF1 protein                                                        |
| GO:0045461 | 7  | 1.87E-02 | 19260861 | MAA_06575 | -4.95  | Beta-ketoacyl synthase                                              |
| GO:0045461 | 7  | 1.87E-02 | 19264708 | MAA_10422 | -3.24  | hypothetical protein MAA_10422                                      |
| GO:0045461 | 7  | 1.87E-02 | 19264330 | MAA_10044 | -1.78  | Cytochrome P450, DtxS2                                              |
| GO:0045461 | 7  | 1.87E-02 | 19263397 | MAA_09111 | 1.01   | NUDIX hydrolase domain protein                                      |
| GO:0045461 | 7  | 1.87E-02 | 19262652 | MAA_08366 | 1.80   | methyltransferase [Metarhizium robertsii]                           |
| GO:0045461 | 7  | 1.87E-02 | 19264488 | MAA_10202 | 14.39  | Beta-ketoacyl synthase                                              |
| GO:0001765 | 7  | 2.23E-02 | 19264416 | MAA_10130 | -1.09  | Major facilitator superfamily domain, general substrate transporter |
| GO:0001765 | 7  | 2.23E-02 | 23632275 | MAA_10826 | -1.04  | meiotic recombination protein DMC1                                  |
| GO:1900787 | 7  | 2.23E-02 | 19257525 | MAA_03239 | -2.33  | Beta-ketoacyl synthase                                              |
| GO:1900787 | 7  | 2.23E-02 | 23632196 | MAA_10747 | 1.39   | ankyrin repeat protein                                              |
| GO:0001848 | 5  | 2.23E-02 | 19257525 | MAA_03239 | -2.33  | Beta-ketoacyl synthase                                              |
| GO:0001848 | 5  | 2.23E-02 | 23632196 | MAA_10747 | 1.39   | ankyrin repeat protein                                              |
| GO:1900793 | 7  | 2.23E-02 | 19255257 | MAA_00971 | -4.81  | Aromatic prenyltransferase, DMATS type                              |
| GO:1900793 | 7  | 2.23E-02 | 19260861 | MAA_06575 | -4.95  | Beta-ketoacyl synthase                                              |
| GO:0015074 | 8  | 2.41E-02 | 19255677 | MAA_01391 | 1.06   | transposase                                                         |
| GO:0015074 | 8  | 2.41E-02 | 19264758 | MAA_10472 | 1.26   | gag-pol polyprotein                                                 |
| GO:0015074 | 8  | 2.41E-02 | 23632364 | MAA_10915 | 1.41   | hypothetical protein MAA_10915                                      |
| GO:0000002 | 7  | 2.52E-02 | 19254648 | MAA_00362 | 1.35   | PIF1 protein                                                        |
| GO:0000002 | 7  | 2.52E-02 | 19263390 | MAA_09104 | 1.10   | aaa ATPase                                                          |
| GO:0000002 | 7  | 2.52E-02 | 19264434 | MAA_10148 | 1.13   | ATP-dependent DNA helicase PIF1                                     |
| GO:0000002 | 7  | 2.52E-02 | 19264635 | MAA_10349 | 1.28   | ATP-dependent DNA helicase PIF1                                     |
| GO:0000002 | 7  | 2.52E-02 | 23633205 | MAA_11757 | 1.07   | hypothetical protein MAA_11757                                      |
| GO:0006810 | 5  | 2.82E-02 | 19263527 | MAA_09241 | -2.28  | cysteine-rich secretory protein                                     |
| GO:0006810 | 5  | 2.82E-02 | 19262202 | MAA_07916 | -2.26  | major facilitator superfamily transporter                           |
| GO:0006810 | 5  | 2.82E-02 | 19263703 | MAA_09417 | -1.30  | oligopeptide transporter                                            |
| GO:0006810 | 5  | 2.82E-02 | 19263316 | MAA_09030 | 1.02   | Sodium/solute symporter                                             |
| GO:0006810 | 5  | 2.82E-02 | 19258027 | MAA_03741 | 1.57   | Major facilitator superfamily domain, general substrate transporter |
| GO:0009116 | 8  | 3.14E-02 | 19262115 | MAA_07829 | -4.38  | WD40 repeat-like-containing domain protein                          |
| GO:0009116 | 8  | 3.14E-02 | 19263074 | MAA_08788 | -3.60  | ankyrin repeat-containing protein                                   |
| GO:0009116 | 8  | 3.14E-02 | 19264518 | MAA_10232 | -1.88  | ankyrin repeat containing protein                                   |
| GO:0009116 | 8  | 3.14E-02 | 19254338 | MAA_00052 | -1.71  | Nucleoside phosphorylase domain protein                             |
| GO:0009116 | 8  | 3.14E-02 | 19255698 | MAA_01412 | -1.06  | Ankyrin repeat-containing domain protein                            |
| GO:0003700 | 4  | 3.18E-02 | 23633117 | MAA_11669 | -13.77 | hypothetical protein MAA_11669                                      |
| GO:0003700 | 4  | 3.18E-02 | 19255215 | MAA_00929 | -2.17  | Ribonuclease H-like protein                                         |
| GO:0003700 | 4  | 3.18E-02 | 19257739 | MAA_03453 | -1.21  | fungal specific transcription factor                                |
| GO:0003700 | 4  | 3.18E-02 | 23632363 | MAA_10914 | 1.00   | pol-like protein                                                    |
| GO:0003700 | 4  | 3.18E-02 | 19262889 | MAA_08603 | 1.04   | transcription factor Cys6                                           |
| GO:0003700 | 4  | 3.18E-02 | 23633175 | MAA_11727 | 1.08   | FluG domain-containing protein                                      |
| GO:0003700 | 4  | 3.18E-02 | 19254667 | MAA_00381 | 1.11   | Ribonuclease H-like protein                                         |
| GO:0003700 | 4  | 3.18E-02 | 19263392 | MAA_09106 | 1.12   | FluG domain-containing protein                                      |
| GO:0003700 | 4  | 3.18E-02 | 19264446 | MAA_10160 | 1.20   | transposase-like protein                                            |
| GO:0003700 | 4  | 3.18E-02 | 19264853 | MAA_10567 | 1.42   | restless-like transposase                                           |
| GO:1902181 | 7  | 3.24E-02 | 19262904 | MAA_08618 | 1.81   | Phytanoyl-CoA dioxygenase PhyH                                      |
| GO:1902181 | 7  | 3.24E-02 | 19262909 | MAA_08623 | 2.21   | phytanoyl-CoA dioxygenase                                           |
| GO:0018101 | 11 | 3.24E-02 | 19254780 | MAA_00494 | 1.36   | protein-arginine deiminase type-4                                   |
| GO:0018101 | 11 | 3.24E-02 | 19262135 | MAA_07849 | -3.25  | protein-arginine deiminase type-4                                   |
| GO:0043324 | 6  | 3.24E-02 | 19257525 | MAA_03239 | -2.33  | Beta-ketoacyl synthase                                              |
| GO:0043324 | 6  | 3.24E-02 | 23632196 | MAA_10747 | 1.39   | ankyrin repeat protein                                              |
| GO:0042710 | 5  | 3.24E-02 | 19264416 | MAA_10130 | -1.09  | Major facilitator superfamily domain, general substrate transporter |
| GO:0042710 | 5  | 3.24E-02 | 23632275 | MAA_10826 | -1.04  | meiotic recombination protein DMC1                                  |
| GO:0071577 | 11 | 3.24E-02 | 19260674 | MAA_06388 | -1.90  | Cd2+/Zn2+ transporter protein                                       |
| GO:0071577 | 11 | 3.24E-02 | 19264673 | MAA_10387 | -1.89  | ZIP Zinc transporter                                                |
| GO:0009058 | 4  | 3.33E-02 | 19258721 | MAA_04435 | -1.23  | Salicylate synthase                                                 |
| GO:0009058 | 4  | 3.33E-02 | 19261231 | MAA_06945 | -1.05  | glycosyltransferase family 4 protein                                |
| GO:0009058 | 4  | 3.33E-02 | 19262903 | MAA_08617 | 1.87   | aromatic amino acid aminotransferase                                |
| GO:0009058 | 4  | 3.33E-02 | 19263977 | MAA_09691 | 1.17   | 1-aminocyclopropane-1-carboxylate synthase                          |
| GO:0050660 | 6  | 3.34E-02 | 19263838 | MAA_09552 | -3.11  | FAD-binding, type 2                                                 |
| GO:0050660 | 6  | 3.34E-02 | 19259153 | MAA_04867 | -2.08  | Pyridine nucleotide-disulfide oxidoreductase                        |
| GO:0050660 | 6  | 3.34E-02 | 19254343 | MAA_00057 | -1.53  | choline dehydrogenase                                               |

|            |    |          |          |           |       |                                                                     |
|------------|----|----------|----------|-----------|-------|---------------------------------------------------------------------|
| GO:0050660 | 6  | 3.34E-02 | 19255901 | MAA_01615 | -1.48 | glucose oxidase                                                     |
| GO:0050660 | 6  | 3.34E-02 | 23632270 | MAA_10821 | -1.03 | ubiquitin-conjugating enzyme                                        |
| GO:0050660 | 6  | 3.34E-02 | 19262218 | MAA_07932 | 2.17  | Pyruvate/2-oxoglutarate dehydrogenase                               |
| GO:0050660 | 6  | 3.34E-02 | 19264505 | MAA_10219 | 2.44  | FAD/FMN-containing isoamyl alcohol oxidase MreA                     |
| GO:0016709 | 6  | 4.22E-02 | 19255798 | MAA_01512 | -2.15 | Cytochrome P450 CYP5148B3                                           |
| GO:0016709 | 6  | 4.22E-02 | 19264499 | MAA_10213 | -1.34 | Cytochrome P450 CYP5317A1                                           |
| GO:0016709 | 6  | 4.22E-02 | 19255582 | MAA_01296 | 1.94  | Cytochrome P450 CYP620N1                                            |
| GO:1900584 | 6  | 4.22E-02 | 19260861 | MAA_06575 | -4.95 | Beta-ketoacyl synthase                                              |
| GO:1900584 | 6  | 4.22E-02 | 19262652 | MAA_08366 | 1.80  | methyltransferase [Metarhizium robertsii]                           |
| GO:1900584 | 6  | 4.22E-02 | 19264488 | MAA_10202 | 14.39 | Beta-ketoacyl synthase                                              |
| GO:0022857 | 4  | 4.31E-02 | 19263051 | MAA_08765 | -1.78 | sugar transporter-like protein                                      |
| GO:0022857 | 4  | 4.31E-02 | 19264281 | MAA_09995 | -1.63 | major facilitator superfamily transporter                           |
| GO:0022857 | 4  | 4.31E-02 | 19256624 | MAA_02338 | -1.55 | General substrate transporter                                       |
| GO:0022857 | 4  | 4.31E-02 | 19256697 | MAA_02411 | -1.06 | alpha glucoside transporter                                         |
| GO:0022857 | 4  | 4.31E-02 | 19256607 | MAA_02321 | 2.02  | Major facilitator superfamily domain, general substrate transporter |
| GO:0022857 | 4  | 4.31E-02 | 19257555 | MAA_03269 | 5.05  | membrane transporter                                                |
| GO:0051537 | 6  | 4.39E-02 | 19261778 | MAA_07492 | -1.78 | c6 zinc finger domain containing protein                            |
| GO:0051537 | 6  | 4.39E-02 | 23632897 | MAA_11449 | -2.96 | Ankyrin repeat-containing domain protein                            |
| GO:0006066 | 5  | 4.39E-02 | 19254343 | MAA_00057 | -1.53 | choline dehydrogenase                                               |
| GO:0006066 | 5  | 4.39E-02 | 19255901 | MAA_01615 | -1.48 | glucose oxidase                                                     |
| GO:0045121 | 6  | 4.39E-02 | 19264416 | MAA_10130 | -1.09 | Major facilitator superfamily domain, general substrate transporter |
| GO:0045121 | 6  | 4.39E-02 | 23632275 | MAA_10826 | -1.04 | meiotic recombination protein DMC1                                  |
| GO:0042243 | 5  | 4.39E-02 | 19257525 | MAA_03239 | -2.33 | Beta-ketoacyl synthase                                              |
| GO:0042243 | 5  | 4.39E-02 | 23632196 | MAA_10747 | 1.39  | ankyrin repeat protein                                              |
| GO:0071931 | 10 | 4.97E-02 | 19264559 | MAA_10273 | -4.71 | Asparaginase/glutaminase                                            |
| GO:0019500 | 7  | 4.97E-02 | 19264611 | MAA_10325 | 1.69  | Nitrilase/cyanide hydratase and apolipoprotein N-acyltransferase    |
| GO:0032088 | 7  | 4.97E-02 | 23632752 | MAA_11304 | -1.11 | maleylacetate reductase                                             |
| GO:0045148 | 9  | 4.97E-02 | 19262821 | MAA_08535 | 11.37 | tripeptidyl peptidase a                                             |
| GO:0017064 | 7  | 4.97E-02 | 19265002 | MAA_10718 | 1.64  | hypothetical protein MAA_10718                                      |
| GO:0051092 | 7  | 4.97E-02 | 23632752 | MAA_11304 | -1.11 | maleylacetate reductase                                             |
| GO:0032736 | 8  | 4.97E-02 | 23632752 | MAA_11304 | -1.11 | maleylacetate reductase                                             |
| GO:0035229 | 8  | 4.97E-02 | 19259926 | MAA_05640 | -1.01 | aldo-keto reductase family protein                                  |
| GO:0050701 | 12 | 4.97E-02 | 23632752 | MAA_11304 | -1.11 | maleylacetate reductase                                             |
| GO:2000100 | 8  | 4.97E-02 | 19264830 | MAA_10544 | 1.01  | Protein kinase, ATP binding site                                    |
| GO:0031579 | 6  | 4.97E-02 | 19263663 | MAA_09377 | -2.01 | SPFH domain/Band 7 family protein                                   |
| GO:0048288 | 9  | 4.97E-02 | 19256359 | MAA_02073 | 1.21  | nuclear membrane fusion protein Kar5                                |
| GO:1900196 | 8  | 4.97E-02 | 19260324 | MAA_06038 | -1.57 | pH regulatory protein mrPacC                                        |
| GO:0046565 | 7  | 4.97E-02 | 19264141 | MAA_09855 | 1.22  | 4-hydroxyphenylpyruvate dioxygenase                                 |
| GO:0015189 | 7  | 4.97E-02 | 19261806 | MAA_07520 | 1.00  | major facilitator superfamily transporter                           |
| GO:0019619 | 9  | 4.97E-02 | 19256410 | MAA_02124 | -1.05 | menaquinone methyltransferase related to dlpA protein               |
| GO:0032753 | 8  | 4.97E-02 | 23632752 | MAA_11304 | -1.11 | maleylacetate reductase                                             |
| GO:0019566 | 8  | 4.97E-02 | 19254294 | MAA_00008 | -1.27 | Alpha-L-arabinofuranosidase B, catalytic                            |
| GO:1900602 | 6  | 4.97E-02 | 19260861 | MAA_06575 | -4.95 | Beta-ketoacyl synthase                                              |
| GO:0050537 | 7  | 4.97E-02 | 19262832 | MAA_08546 | 1.46  | Amidase                                                             |
| GO:0045111 | 7  | 4.97E-02 | 19262135 | MAA_07849 | -3.25 | protein-arginine deiminase type-4                                   |
| GO:0051607 | 5  | 4.97E-02 | 23632752 | MAA_11304 | -1.11 | maleylacetate reductase                                             |
| GO:0006954 | 6  | 4.97E-02 | 23632752 | MAA_11304 | -1.11 | maleylacetate reductase                                             |
| GO:0072741 | 7  | 4.97E-02 | 19264830 | MAA_10544 | 1.01  | Protein kinase, ATP binding site                                    |
| GO:1900695 | 7  | 4.97E-02 | 19260324 | MAA_06038 | -1.57 | pH regulatory protein mrPacC                                        |
| GO:1903714 | 12 | 4.97E-02 | 19261806 | MAA_07520 | 1.00  | major facilitator superfamily transporter                           |
| GO:0006530 | 12 | 4.97E-02 | 19264559 | MAA_10273 | -4.71 | Asparaginase/glutaminase                                            |
| GO:0017109 | 6  | 4.97E-02 | 19259926 | MAA_05640 | -1.01 | aldo-keto reductase family protein                                  |
| GO:0050713 | 10 | 4.97E-02 | 23632752 | MAA_11304 | -1.11 | maleylacetate reductase                                             |
| GO:0032754 | 8  | 4.97E-02 | 23632752 | MAA_11304 | -1.11 | maleylacetate reductase                                             |
| GO:0000257 | 7  | 4.97E-02 | 19264611 | MAA_10325 | 1.69  | Nitrilase/cyanide hydratase and apolipoprotein N-acyltransferase    |
| GO:0000721 | 7  | 4.97E-02 | 19263692 | MAA_09406 | 1.17  | hypothetical protein MAA_09406                                      |
| GO:2000553 | 12 | 4.97E-02 | 23632752 | MAA_11304 | -1.11 | maleylacetate reductase                                             |
| GO:0008689 | 8  | 4.97E-02 | 19260313 | MAA_06027 | 1.92  | type 11 methyltransferase                                           |
| GO:0002674 | 10 | 4.97E-02 | 23632752 | MAA_11304 | -1.11 | maleylacetate reductase                                             |
| GO:0044546 | 8  | 4.97E-02 | 23632752 | MAA_11304 | -1.11 | maleylacetate reductase                                             |
| GO:0051560 | 12 | 4.97E-02 | 19259729 | MAA_05443 | -1.96 | siderophore biosynthesis protein                                    |



|            |    |          |          |           |       |                                                                  |
|------------|----|----------|----------|-----------|-------|------------------------------------------------------------------|
| GO:0033934 | 7  | 4.97E-02 | 19263052 | MAA_08766 | -1.67 | maltase                                                          |
| GO:0050421 | 7  | 4.97E-02 | 19263202 | MAA_08916 | 1.45  | multicopper oxidase                                              |
| GO:0000907 | 7  | 4.97E-02 | 19263874 | MAA_09588 | 1.89  | TfdA family Taurine catabolism dioxygenase TauD                  |
| GO:0044273 | 6  | 4.97E-02 | 19263874 | MAA_09588 | 1.89  | TfdA family Taurine catabolism dioxygenase TauD                  |
| GO:0071222 | 8  | 4.97E-02 | 23632752 | MAA_11304 | -1.11 | maleylacetate reductase                                          |
| GO:0036444 | 13 | 4.97E-02 | 19259729 | MAA_05443 | -1.96 | siderophore biosynthesis protein                                 |
| GO:0030600 | 7  | 4.97E-02 | 19257778 | MAA_03492 | 1.14  | feruloyl esterase B                                              |
| GO:2000321 | 9  | 4.97E-02 | 23632752 | MAA_11304 | -1.11 | maleylacetate reductase                                          |
| GO:0003858 | 7  | 4.97E-02 | 19262824 | MAA_08538 | 1.13  | 3-hydroxyacid dehydrogenase/reductase                            |
| GO:0072559 | 5  | 4.97E-02 | 23632752 | MAA_11304 | -1.11 | maleylacetate reductase                                          |
| GO:0032621 | 5  | 4.97E-02 | 23632752 | MAA_11304 | -1.11 | maleylacetate reductase                                          |
| GO:0045630 | 9  | 4.97E-02 | 23632752 | MAA_11304 | -1.11 | maleylacetate reductase                                          |
| GO:1900813 | 7  | 4.97E-02 | 19260861 | MAA_06575 | -4.95 | Beta-ketoacyl synthase                                           |
| GO:0047443 | 7  | 4.97E-02 | 19256410 | MAA_02124 | -1.05 | menaquinone methyltransferase related to dlpA protein            |
| GO:0050718 | 10 | 4.97E-02 | 23632752 | MAA_11304 | -1.11 | maleylacetate reductase                                          |
| GO:0004084 | 7  | 4.97E-02 | 19264325 | MAA_10039 | 1.44  | subgroup IIIi aminotransferase                                   |
| GO:0046556 | 7  | 4.97E-02 | 19254294 | MAA_00008 | -1.27 | Alpha-L-arabinofuranosidase B, catalytic                         |
| GO:0004395 | 9  | 4.97E-02 | 19260313 | MAA_06027 | 1.92  | type 11 methyltransferase                                        |
| GO:0004574 | 9  | 4.97E-02 | 19263052 | MAA_08766 | -1.67 | maltase                                                          |
| GO:0034079 | 10 | 4.97E-02 | 19263692 | MAA_09406 | 1.17  | hypothetical protein MAA_09406                                   |
| GO:0008948 | 7  | 4.97E-02 | 19256410 | MAA_02124 | -1.05 | menaquinone methyltransferase related to dlpA protein            |
| GO:0044595 | 9  | 4.97E-02 | 19260313 | MAA_06027 | 1.92  | type 11 methyltransferase                                        |
| GO:0006877 | 12 | 4.97E-02 | 19260674 | MAA_06388 | -1.90 | Cd2+/Zn2+ transporter protein                                    |
| GO:0007028 | 5  | 4.97E-02 | 19262135 | MAA_07849 | -3.25 | protein-arginine deiminase type-4                                |
| GO:0006919 | 11 | 4.97E-02 | 23632752 | MAA_11304 | -1.11 | maleylacetate reductase                                          |
| GO:0032611 | 6  | 4.97E-02 | 23632752 | MAA_11304 | -1.11 | maleylacetate reductase                                          |
| GO:1902475 | 12 | 4.97E-02 | 19261806 | MAA_07520 | 1.00  | major facilitator superfamily transporter                        |
| GO:0030196 | 7  | 4.97E-02 | 19264611 | MAA_10325 | 1.69  | Nitrilase/cyanide hydratase and apolipoprotein N-acyltransferase |
| GO:0007010 | 6  | 4.97E-02 | 19262135 | MAA_07849 | -3.25 | protein-arginine deiminase type-4                                |
| GO:0030907 | 7  | 4.97E-02 | 19264559 | MAA_10273 | -4.71 | Asparaginase/glutaminase                                         |
| GO:0004067 | 7  | 4.97E-02 | 19264559 | MAA_10273 | -4.71 | Asparaginase/glutaminase                                         |
| GO:0015182 | 8  | 4.97E-02 | 19261806 | MAA_07520 | 1.00  | major facilitator superfamily transporter                        |
| GO:0071947 | 10 | 4.97E-02 | 19262933 | MAA_08647 | -1.04 | hypothetical protein MAA_08647                                   |
| GO:0016139 | 8  | 4.97E-02 | 19263916 | MAA_09630 | -2.03 | alpha-N-acetylgalactosaminidase                                  |
| GO:1990246 | 9  | 4.97E-02 | 19259729 | MAA_05443 | -1.96 | siderophore biosynthesis protein                                 |
| GO:0015067 | 6  | 4.97E-02 | 19264062 | MAA_09776 | 1.15  | lysine amidinotransferase                                        |
| GO:0008425 | 9  | 4.97E-02 | 19260313 | MAA_06027 | 1.92  | type 11 methyltransferase                                        |
| GO:0043143 | 10 | 4.97E-02 | 19262135 | MAA_07849 | -3.25 | protein-arginine deiminase type-4                                |
| GO:0044596 | 8  | 4.97E-02 | 19260313 | MAA_06027 | 1.92  | type 11 methyltransferase                                        |
| GO:0036151 | 10 | 4.97E-02 | 19259306 | MAA_05020 | -1.25 | phospholipase-like protein                                       |
| GO:1990591 | 13 | 4.97E-02 | 19261806 | MAA_07520 | 1.00  | major facilitator superfamily transporter                        |
| GO:0015292 | 7  | 4.97E-02 | 19259729 | MAA_05443 | -1.96 | siderophore biosynthesis protein                                 |
| GO:1901482 | 10 | 4.97E-02 | 19261806 | MAA_07520 | 1.00  | major facilitator superfamily transporter                        |
| GO:0005668 | 8  | 4.97E-02 | 19255392 | MAA_01106 | 1.07  | Ubiquitin supergroup                                             |
| GO:1900549 | 5  | 4.97E-02 | 19260324 | MAA_06038 | -1.57 | pH regulatory protein mrPacC                                     |

**Table S4.** Summation of GO function classes and terms enriched to *M. robertsii*  $\Delta cfp1$  versus WT strain.

| GO_function class / GO_term enriched                                                      | Counts of genes |     |          |
|-------------------------------------------------------------------------------------------|-----------------|-----|----------|
|                                                                                           | down            | up  | subtotal |
| <b>Cellular Component</b>                                                                 |                 |     |          |
| Cellular component                                                                        | 147             | 106 | 253      |
| Extracellular region                                                                      | 16              | 1   | 17       |
| Extracellular space                                                                       | 4               | 1   | 5        |
| Replication fork                                                                          | 0               | 5   | 5        |
| Cell                                                                                      | 1               | 1   | 2        |
| Cell wall                                                                                 | 1               | 1   | 2        |
| Membrane raft                                                                             | 2               | 0   | 2        |
| Intermediate filament cytoskeleton                                                        | 1               | 0   | 1        |
| Glutamate-cysteine ligase complex                                                         | 1               | 0   | 1        |
| NLRP3 inflammasome complex                                                                | 1               | 0   | 1        |
| MBF transcription complex                                                                 | 1               | 0   | 1        |
| Uniplex complex                                                                           | 1               | 0   | 1        |
| RNA polymerase transcription factor SL1 complex                                           | 0               | 1   | 1        |
| <b>Biological Process</b>                                                                 |                 |     |          |
| Oxidation-reduction process                                                               | 17              | 15  | 32       |
| Proteolysis                                                                               | 8               | 6   | 14       |
| Regulation of transcription by RNA polymerase II                                          | 4               | 6   | 10       |
| Secondary metabolic process                                                               | 7               | 3   | 10       |
| Negative regulation of telomerase activity                                                | 0               | 10  | 10       |
| Monodictyphenone biosynthetic process                                                     | 3               | 3   | 6        |
| Sterigmatocystin biosynthetic process                                                     | 3               | 3   | 6        |
| Melanin biosynthetic process                                                              | 4               | 1   | 5        |
| G-quadruplex DNA unwinding                                                                | 0               | 5   | 5        |
| Protein catabolic process                                                                 | 5               | 0   | 5        |
| DNA duplex unwinding                                                                      | 0               | 5   | 5        |
| DNA replication                                                                           | 0               | 5   | 5        |
| Mitochondrial genome maintenance                                                          | 0               | 5   | 5        |
| Transport                                                                                 | 3               | 2   | 5        |
| Nucleoside metabolic process                                                              | 5               | 0   | 5        |
| Dehydroaustinol biosynthetic process                                                      | 1               | 3   | 4        |
| Austinol biosynthetic process                                                             | 1               | 3   | 4        |
| Biosynthetic process                                                                      | 2               | 2   | 4        |
| Xanthone-containing compound biosynthetic process                                         | 3               | 0   | 3        |
| Pigment biosynthetic process                                                              | 2               | 1   | 3        |
| Austinol biosynthetic process                                                             | 3               | 0   | 3        |
| DNA integration                                                                           | 0               | 3   | 3        |
| O-orsellinic acid biosynthetic process                                                    | 1               | 2   | 3        |
| Positive regulation of NF-kappaB transcription factor activity                            | 3               | 0   | 3        |
| Phospholipid catabolic process                                                            | 2               | 0   | 2        |
| Zymogen activation                                                                        | 2               | 0   | 2        |
| Copper ion export                                                                         | 2               | 0   | 2        |
| Membrane raft assembly                                                                    | 2               | 0   | 2        |
| Naphtho-gamma-pyrone biosynthetic process                                                 | 1               | 1   | 2        |
| Shamixanthone biosynthetic process                                                        | 2               | 0   | 2        |
| Verruculogen biosynthetic process                                                         | 0               | 2   | 2        |
| Protein citrullination                                                                    | 1               | 1   | 2        |
| Pigment metabolic process involved in developmental pigmentation                          | 1               | 1   | 2        |
| Biofilm formation                                                                         | 2               | 0   | 2        |
| Zinc II ion transmembrane transport                                                       | 2               | 0   | 2        |
| Alcohol metabolic process                                                                 | 2               | 0   | 2        |
| Asexual spore wall assembly                                                               | 1               | 1   | 2        |
| Positive regulation of transcription involved in G1/S transition of mitotic cell cycle    | 1               | 0   | 1        |
| Cyanide catabolic process                                                                 | 0               | 1   | 1        |
| Negative regulation of NF-kappaB transcription factor activity                            | 1               | 0   | 1        |
| Interleukin-1 secretion                                                                   | 1               | 0   | 1        |
| Regulation of establishment or maintenance of bipolar cell polarity regulating cell shape | 0               | 1   | 1        |

|                                                                                    |    |    |    |
|------------------------------------------------------------------------------------|----|----|----|
| Membrane raft organization                                                         | 1  |    | 1  |
| Nuclear membrane fusion involved in karyogamy                                      | 0  | 1  | 1  |
| Regulation of penicillin biosynthetic process                                      | 1  | 0  | 1  |
| 3,4-dihydroxybenzoate catabolic process                                            | 1  | 0  | 1  |
| Positive regulation of interleukin-4 production                                    | 1  | 0  | 1  |
| Arabinose metabolic process                                                        | 1  | 0  | 1  |
| Endocrocin biosynthetic process                                                    | 1  | 0  | 1  |
| Defense response to virus                                                          | 1  | 0  | 1  |
| Inflammatory response                                                              | 1  | 0  | 1  |
| Protein localization to cell division site                                         | 0  | 1  | 1  |
| Regulation of N',N'',N'''-triacylfusarinine C biosynthetic process                 | 1  | 0  | 1  |
| Isoleucine transmembrane transport                                                 | 0  | 1  | 1  |
| Asparagine catabolic process                                                       | 1  | 0  | 1  |
| Negative regulation of interleukin-1 beta secretion                                | 1  | 0  | 1  |
| Positive regulation of interleukin-5 production                                    | 1  | 0  | 1  |
| Positive regulation of T-helper 2 cell cytokine production                         | 1  | 0  | 1  |
| Negative regulation of acute inflammatory response                                 | 1  | 0  | 1  |
| NLRP3 inflammasome complex assembly                                                | 1  | 0  | 1  |
| Mitochondrial calcium ion homeostasis                                              | 1  | 0  | 1  |
| Sulfur compound catabolic process                                                  | 0  | 1  | 1  |
| Cellular response to lipopolysaccharide                                            | 1  | 0  | 1  |
| Calcium import into the mitochondrion                                              | 1  | 0  | 1  |
| Positive regulation of T-helper 17 cell differentiation                            | 0  | 1  | 1  |
| Interleukin-18 production                                                          | 1  | 0  | 1  |
| Positive regulation of T-helper 2 cell differentiation                             | 1  | 0  | 1  |
| Monodictyphenone metabolic process                                                 | 1  | 0  | 1  |
| Positive regulation of interleukin-1 beta secretion                                | 1  | 0  | 1  |
| Butanediol biosynthetic process                                                    | 0  | 1  | 1  |
| Cellular cobalt ion homeostasis                                                    | 1  | 0  | 1  |
| Cytoplasm organization                                                             | 1  | 0  | 1  |
| Activation of cysteine-type endopeptidase activity involved in apoptotic process   | 1  | 0  | 1  |
| Interleukin-1 beta production                                                      | 1  | 0  | 1  |
| L-alpha-amino acid transmembrane transport                                         | 0  | 1  | 1  |
| Cytoskeleton organization                                                          | 1  | 0  | 1  |
| Protein deubiquitination involved in ubiquitin-dependent protein catabolic process | 1  | 0  | 1  |
| Glycoside catabolic process                                                        | 1  | 0  | 1  |
| Regulation of translation by machinery localization                                | 1  | 0  | 1  |
| Phosphatidylcholine acyl-chain remodeling                                          | 1  | 0  | 1  |
| Asparagine transmembrane import into vacuole                                       | 0  | 1  | 1  |
| L-lysine import into vacuole involved in cellular response to nitrogen starvation  | 0  | 1  | 1  |
| N',N'',N'''-triacylfusarinine C metabolic process                                  | 1  | 0  | 1  |
| <b>Molecular Function</b>                                                          |    |    |    |
| Catalytic activity                                                                 | 13 | 13 | 26 |
| Oxidoreductase activity                                                            | 13 | 10 | 23 |
| DNA binding transcription factor activity                                          | 3  | 10 | 13 |
| Serine-type endopeptidase activity                                                 | 9  | 3  | 12 |
| RNA polymerase II regulatory region sequence-specific DNA binding                  | 2  | 6  | 8  |
| Phosphopantetheine binding                                                         | 6  | 2  | 8  |
| Transferase activity, transferring acyl groups other than amino-acyl groups        | 4  | 4  | 8  |
| Transferase activity                                                               | 3  | 5  | 8  |
| Flavin adenine dinucleotide binding                                                | 5  | 2  | 7  |
| Aspartic-type endopeptidase activity                                               | 6  | 0  | 6  |
| Transmembrane transporter activity                                                 | 4  | 2  | 6  |
| Dioxygenase activity                                                               | 3  | 2  | 5  |
| Oxidoreductase activity, acting on CH-OH group of donors                           | 4  | 1  | 5  |
| Telomerase inhibitor activity                                                      | 0  | 5  | 5  |
| ATP-dependent 5'-3' DNA helicase activity                                          | 0  | 5  | 5  |
| Cation-transporting ATPase activity                                                | 4  | 0  | 4  |
| Protein-arginine deiminase activity                                                | 2  | 2  | 4  |
| Serine-type peptidase activity                                                     | 1  | 3  | 4  |
| Oxidoreductase activity, acting on paired donors, with ... one atom of oxygen      | 2  | 1  | 3  |

|                                                                                |            |            |            |
|--------------------------------------------------------------------------------|------------|------------|------------|
| Oxidoreductase activity, acting on paired donors, with ... two atoms of oxygen | 2          | 0          | 2          |
| Choline dehydrogenase activity                                                 | 2          | 0          | 2          |
| Complement binding                                                             | 1          | 1          | 2          |
| 2 iron, 2 sulfur cluster binding                                               | 2          | 0          | 2          |
| Tripeptide aminopeptidase activity                                             | 0          | 1          | 1          |
| Fatty acid amide hydrolase activity                                            | 0          | 1          | 1          |
| 3-dehydroshikimate dehydratase activity                                        | 0          | 1          | 1          |
| L-lysine transmembrane transporter activity                                    | 0          | 1          | 1          |
| Mandelamide amidase activity                                                   | 0          | 1          | 1          |
| Nitrilase activity                                                             | 0          | 1          | 1          |
| (R,R)-butanediol dehydrogenase activity                                        | 0          | 1          | 1          |
| 3-demethylubiquinone-9 3-O-methyltransferase activity                          | 0          | 1          | 1          |
| Glucan 1,4-alpha-maltotriohydrolase activity                                   | 1          | 0          | 1          |
| Nitrite reductase (NO-forming) activity                                        | 0          | 1          | 1          |
| Sulfonate dioxygenase activity                                                 | 0          | 1          | 1          |
| Feruloyl esterase activity                                                     | 1          | 0          | 1          |
| 3-hydroxybutyrate dehydrogenase activity                                       | 1          | 0          | 1          |
| 4-hydroxy-4-methyl-2-oxoglutarate aldolase activity                            | 1          | 0          | 1          |
| Branched-chain-amino-acid transaminase activity                                | 0          | 1          | 1          |
| Alpha-L-arabinofuranosidase activity                                           | 1          | 0          | 1          |
| Hexaprenyldihydroxybenzoate methyltransferase activity                         | 0          | 1          | 1          |
| Oligo-1,6-glucosidase activity                                                 | 1          | 0          | 1          |
| Oxaloacetate decarboxylase activity                                            | 1          | 0          | 1          |
| Decaprenyldihydroxybenzoate methyltransferase activity                         | 0          | 1          | 1          |
| Cyanide hydratase activity                                                     | 0          | 1          | 1          |
| Asparaginase activity                                                          | 1          | 0          | 1          |
| L-asparagine transmembrane transporter activity                                | 0          | 1          | 1          |
| Amidinotransferase activity                                                    | 0          | 1          | 1          |
| 2-polyprenyl-6-methoxy-1,4-benzoquinone methyltransferase activity             | 0          | 1          | 1          |
| 3-demethylubiquinone-10 3-O-methyltransferase activity                         | 0          | 1          | 1          |
| Uniporter activity                                                             | 1          | 0          | 1          |
| <b>Total:</b>                                                                  | <b>406</b> | <b>311</b> | <b>717</b> |

**Table S5.** KEGG pathway analysis of differential expressed genes in *M. robertsii*  $\Delta$ *cfpI* versus WT strain.

| Pathway_id | Pathway_name                             | p-value  | KO_entry | EC                     | Gene_ID  | Gene_name | log <sub>2</sub> R | Description                                     |
|------------|------------------------------------------|----------|----------|------------------------|----------|-----------|--------------------|-------------------------------------------------|
| ko00260    | Glycine, serine and threonine metabolism | 6.27E-04 | K00108   | EC:1.1.99.1            | 19254343 | MAA_00057 | -1.53              | choline dehydrogenase                           |
| ko00260    | Glycine, serine and threonine metabolism | 6.27E-04 | K00108   | EC:1.1.99.1            | 19255901 | MAA_01615 | -1.48              | glucose oxidase                                 |
| ko00260    | Glycine, serine and threonine metabolism | 6.27E-04 | K00306   | EC:1.5.3.1;EC:1.5.3.7  | 19257557 | MAA_03271 | -1.47              | flavin-binding monooxygenase                    |
| ko00260    | Glycine, serine and threonine metabolism | 6.27E-04 | K00865   | EC:2.7.1.165           | 19262758 | MAA_08472 | -1.32              | Glycerate kinase                                |
| ko00260    | Glycine, serine and threonine metabolism | 6.27E-04 | K00108   | EC:1.1.99.1            | 23632203 | MAA_10754 | -1.15              | gag-pol polypeptide                             |
| ko00260    | Glycine, serine and threonine metabolism | 6.27E-04 | K00600   | EC:2.1.2.1             | 19262129 | MAA_07843 | -1.02              | patatin-like phospholipase                      |
| ko00260    | Glycine, serine and threonine metabolism | 6.27E-04 | K00613   | EC:2.1.4.1             | 19264062 | MAA_09776 | 1.15               | lysine amidinotransferase                       |
| ko00260    | Glycine, serine and threonine metabolism | 6.27E-04 | K01733   | EC:4.2.3.1             | 19255583 | MAA_01297 | 1.38               | haloacid dehalogenase                           |
| ko00260    | Glycine, serine and threonine metabolism | 6.27E-04 | K00306   | EC:1.5.3.1;EC:1.5.3.7  | 19256546 | MAA_02260 | 1.62               | sarcosine oxidase                               |
| ko00260    | Glycine, serine and threonine metabolism | 6.27E-04 | K00831   | EC:2.6.1.52            | 19262906 | MAA_08620 | 1.84               | nmrA-like family protein                        |
| ko00260    | Glycine, serine and threonine metabolism | 6.27E-04 | K00108   | EC:1.1.99.1            | 19262974 | MAA_08688 | 2.00               | CFEM domain protein                             |
| ko00260    | Glycine, serine and threonine metabolism | 6.27E-04 | K00382   | EC:1.8.1.4             | 19262218 | MAA_07932 | 2.17               | Pyruvate/2-oxoglutarate dehydrogenase           |
| ko00061    | Fatty acid biosynthesis                  | 1.09E-03 | K00059   | EC:1.1.1.100           | 19257526 | MAA_03240 | -3.79              | hypothetical protein MAA_03240                  |
| ko00061    | Fatty acid biosynthesis                  | 1.09E-03 | K00059   | EC:1.1.1.100           | 19264708 | MAA_10422 | -3.24              | hypothetical protein MAA_10422                  |
| ko00061    | Fatty acid biosynthesis                  | 1.09E-03 | K01897   | EC:6.2.1.3             | 19263892 | MAA_09606 | -1.21              | FAD binding domain-containing protein           |
| ko00061    | Fatty acid biosynthesis                  | 1.09E-03 | K01897   | EC:6.2.1.3             | 23632270 | MAA_10821 | -1.03              | ubiquitin-conjugating enzyme                    |
| ko00061    | Fatty acid biosynthesis                  | 1.09E-03 | K01897   | EC:6.2.1.3             | 19258184 | MAA_03898 | 1.14               | long-chain-fatty-acid-CoA ligase                |
| ko00061    | Fatty acid biosynthesis                  | 1.09E-03 | K00059   | EC:1.1.1.100           | 19260992 | MAA_06706 | 2.30               | short-chain dehydrogenase                       |
| ko00061    | Fatty acid biosynthesis                  | 1.09E-03 | K01897   | EC:6.2.1.3             | 19264505 | MAA_10219 | 2.44               | FAD/FMN-containing isoamyl alcohol oxidase MreA |
| ko00564    | Glycerophospholipid metabolism           | 2.01E-03 | K01613   | EC:4.1.1.65            | 19261596 | MAA_07310 | -1.34              | integral membrane family protein                |
| ko00564    | Glycerophospholipid metabolism           | 2.01E-03 | K13333   | EC:3.1.1.5             | 19259306 | MAA_05020 | -1.25              | phospholipase-like protein                      |
| ko00564    | Glycerophospholipid metabolism           | 2.01E-03 | K13333   | EC:3.1.1.5             | 19260910 | MAA_06624 | -1.11              | lysophospholipase precursor                     |
| ko00564    | Glycerophospholipid metabolism           | 2.01E-03 | K01049   | EC:3.1.1.7             | 19262271 | MAA_07985 | -1.09              | carboxylesterase/lipase domain protein          |
| ko00564    | Glycerophospholipid metabolism           | 2.01E-03 | K18693   | EC:3.1.3.81;EC:3.1.3.4 | 19256214 | MAA_01928 | -1.02              | Ubiquitin 3 binding protein But2                |
| ko00564    | Glycerophospholipid metabolism           | 2.01E-03 | K01613   | EC:4.1.1.65            | 19264450 | MAA_10164 | 1.14               | reverse transcriptase, RNaseH                   |
| ko00564    | Glycerophospholipid metabolism           | 2.01E-03 | K13333   | EC:3.1.1.5             | 19258326 | MAA_04040 | 1.41               | alpha/beta hydrolase                            |
| ko00564    | Glycerophospholipid metabolism           | 2.01E-03 | K06123   | EC:1.1.1.101           | 19258327 | MAA_04041 | 1.61               | hypothetical protein MAA_04041                  |
| ko00564    | Glycerophospholipid metabolism           | 2.01E-03 | K06123   | EC:1.1.1.101           | 23633070 | MAA_11622 | 1.71               | hypothetical protein MAA_11622                  |
| ko00564    | Glycerophospholipid metabolism           | 2.01E-03 | K01114   | EC:3.1.4.3             | 19255954 | MAA_01668 | 1.84               | Phosphoesterase                                 |
| ko00564    | Glycerophospholipid metabolism           | 2.01E-03 | K01613   | EC:4.1.1.65            | 19260312 | MAA_06026 | 2.08               | phosphatidylserine decarboxylase family protein |
| ko00350    | Tyrosine metabolism                      | 6.88E-03 | K00129   | EC:1.2.1.5             | 19258281 | MAA_03995 | -1.51              | ThiJ/PfpI family protein                        |
| ko00350    | Tyrosine metabolism                      | 6.88E-03 | K00129   | EC:1.2.1.5             | 19260050 | MAA_05764 | -1.31              | ThiJ/PfpI                                       |
| ko00350    | Tyrosine metabolism                      | 6.88E-03 | K13953   | EC:1.1.1.1             | 19256915 | MAA_02629 | 1.05               | Alcohol dehydrogenase superfamily, zinc-type    |
| ko00350    | Tyrosine metabolism                      | 6.88E-03 | K00450   | EC:1.13.11.4           | 19256665 | MAA_02379 | 1.12               | Aromatic-ring hydroxylase-like protein          |
| ko00350    | Tyrosine metabolism                      | 6.88E-03 | K00129   | EC:1.2.1.5             | 19259248 | MAA_04962 | 1.12               | aldehyde dehydrogenase                          |
| ko00350    | Tyrosine metabolism                      | 6.88E-03 | K00457   | EC:1.13.11.27          | 19264141 | MAA_09855 | 1.22               | 4-hydroxyphenylpyruvate dioxygenase             |

|         |                            |          |        |                           |          |           |        |                                                  |
|---------|----------------------------|----------|--------|---------------------------|----------|-----------|--------|--------------------------------------------------|
| ko00350 | Tyrosine metabolism        | 6.88E-03 | K00129 | EC:1.2.1.5                | 19261170 | MAA_06884 | 1.36   | Aldehyde dehydrogenase                           |
| ko00350 | Tyrosine metabolism        | 6.88E-03 | K02510 | EC:4.1.2.52               | 19260837 | MAA_06551 | 1.39   | macrophomate synthase                            |
| ko00350 | Tyrosine metabolism        | 6.88E-03 | K00838 | EC:2.6.1.57;EC:2.6.1.39   | 19262903 | MAA_08617 | 1.87   | aromatic amino acid aminotransferase             |
| ko00410 | beta-Alanine metabolism    | 7.80E-03 | K01580 | EC:4.1.1.15               | 19264332 | MAA_10046 | -3.68  | Aspartic acid decarboxylase, DtxS4               |
| ko00410 | beta-Alanine metabolism    | 7.80E-03 | K00129 | EC:1.2.1.5                | 19258281 | MAA_03995 | -1.51  | ThiJ/PfpI family protein                         |
| ko00410 | beta-Alanine metabolism    | 7.80E-03 | K00129 | EC:1.2.1.5                | 19260050 | MAA_05764 | -1.31  | ThiJ/PfpI                                        |
| ko00410 | beta-Alanine metabolism    | 7.80E-03 | K13366 | EC:1.5.3.14;EC:1.5.3.16   | 19259242 | MAA_04956 | 1.07   | Amine oxidase                                    |
| ko00410 | beta-Alanine metabolism    | 7.80E-03 | K00129 | EC:1.2.1.5                | 19259248 | MAA_04962 | 1.12   | aldehyde dehydrogenase                           |
| ko00410 | beta-Alanine metabolism    | 7.80E-03 | K00129 | EC:1.2.1.5                | 19261170 | MAA_06884 | 1.36   | Aldehyde dehydrogenase                           |
| ko00410 | beta-Alanine metabolism    | 7.80E-03 | K01580 | EC:4.1.1.15               | 19264603 | MAA_10317 | 1.98   | pyridoxal-dependent decarboxylase domain protein |
| ko00360 | Phenylalanine metabolism   | 1.09E-02 | K00129 | EC:1.2.1.5                | 19258281 | MAA_03995 | -1.51  | ThiJ/PfpI family protein                         |
| ko00360 | Phenylalanine metabolism   | 1.09E-02 | K10437 | EC:1.14.14.54             | 19264499 | MAA_10213 | -1.34  | Cytochrome P450 CYP5317A1                        |
| ko00360 | Phenylalanine metabolism   | 1.09E-02 | K00129 | EC:1.2.1.5                | 19260050 | MAA_05764 | -1.31  | ThiJ/PfpI                                        |
| ko00360 | Phenylalanine metabolism   | 1.09E-02 | K00129 | EC:1.2.1.5                | 19259248 | MAA_04962 | 1.12   | aldehyde dehydrogenase                           |
| ko00360 | Phenylalanine metabolism   | 1.09E-02 | K00457 | EC:1.13.11.27             | 19264141 | MAA_09855 | 1.22   | 4-hydroxyphenylpyruvate dioxygenase              |
| ko00360 | Phenylalanine metabolism   | 1.09E-02 | K00129 | EC:1.2.1.5                | 19261170 | MAA_06884 | 1.36   | Aldehyde dehydrogenase                           |
| ko00360 | Phenylalanine metabolism   | 1.09E-02 | K01426 | EC:3.5.1.4                | 19265002 | MAA_10718 | 1.64   | hypothetical protein MAA_10718                   |
| ko00360 | Phenylalanine metabolism   | 1.09E-02 | K00838 | EC:2.6.1.57;EC:2.6.1.39   | 19262903 | MAA_08617 | 1.87   | aromatic amino acid aminotransferase             |
| ko00052 | Galactose metabolism       | 1.38E-02 | K07407 | EC:3.2.1.22               | 19263916 | MAA_09630 | -2.03  | alpha-N-acetylgalactosaminidase                  |
| ko00052 | Galactose metabolism       | 1.38E-02 | K01182 | EC:3.2.1.10               | 19263052 | MAA_08766 | -1.67  | maltase                                          |
| ko00052 | Galactose metabolism       | 1.38E-02 | K01784 | EC:5.1.3.2                | 19261230 | MAA_06944 | -1.53  | UDP-glucose 4-epimerase                          |
| ko00052 | Galactose metabolism       | 1.38E-02 | K00844 | EC:2.7.1.1                | 19256497 | MAA_02211 | -1.24  | hexokinase-1                                     |
| ko00052 | Galactose metabolism       | 1.38E-02 | K01190 | EC:3.2.1.23               | 19263915 | MAA_09629 | -1.08  | Glycoside hydrolase, family 35                   |
| ko00340 | Histidine metabolism       | 1.93E-02 | K00129 | EC:1.2.1.5                | 19258281 | MAA_03995 | -1.51  | ThiJ/PfpI family protein                         |
| ko00340 | Histidine metabolism       | 1.93E-02 | K00129 | EC:1.2.1.5                | 19260050 | MAA_05764 | -1.31  | ThiJ/PfpI                                        |
| ko00340 | Histidine metabolism       | 1.93E-02 | K00129 | EC:1.2.1.5                | 19259248 | MAA_04962 | 1.12   | aldehyde dehydrogenase                           |
| ko00340 | Histidine metabolism       | 1.93E-02 | K20246 | EC:2.1.1.44;EC:1.14.99.51 | 19259142 | MAA_04856 | 1.23   | DUF323 domain protein                            |
| ko00340 | Histidine metabolism       | 1.93E-02 | K00129 | EC:1.2.1.5                | 19261170 | MAA_06884 | 1.36   | Aldehyde dehydrogenase                           |
| ko00750 | Vitamin B6 metabolism      | 2.22E-02 | K05275 | EC:1.1.1.65               | 19264018 | MAA_09732 | 1.02   | Aldo/keto reductase                              |
| ko00750 | Vitamin B6 metabolism      | 2.22E-02 | K01733 | EC:4.2.3.1                | 19255583 | MAA_01297 | 1.38   | haloacid dehalogenase                            |
| ko00750 | Vitamin B6 metabolism      | 2.22E-02 | K00831 | EC:2.6.1.52               | 19262906 | MAA_08620 | 1.84   | nmrA-like family protein                         |
| ko04145 | Phagosome                  | 2.95E-02 | K07374 | NA                        | 19264807 | MAA_10521 | -10.75 | zinc knuckle                                     |
| ko04145 | Phagosome                  | 2.95E-02 | K02155 | NA                        | 19262115 | MAA_07829 | -4.38  | WD40 repeat-like-containing domain protein       |
| ko04145 | Phagosome                  | 2.95E-02 | K02155 | NA                        | 19263074 | MAA_08788 | -3.60  | ankyrin repeat-containing protein                |
| ko04145 | Phagosome                  | 2.95E-02 | K02147 | NA                        | 19264333 | MAA_10047 | -3.17  | V-type ATPase                                    |
| ko04145 | Phagosome                  | 2.95E-02 | K02155 | NA                        | 19264518 | MAA_10232 | -1.88  | ankyrin repeat containing protein                |
| ko04145 | Phagosome                  | 2.95E-02 | K00921 | EC:2.7.1.150              | 19261146 | MAA_06860 | 1.01   | F-box domain protein                             |
| ko00460 | Cyanoamino acid metabolism | 3.39E-02 | K01424 | EC:3.5.1.1                | 19264559 | MAA_10273 | -4.71  | Asparaginase/glutaminase                         |
| ko00460 | Cyanoamino acid metabolism | 3.39E-02 | K01188 | EC:3.2.1.21               | 19260432 | MAA_06146 | -1.06  | glycoside hydrolase family 3 protein             |

|         |                                             |          |        |                       |          |           |       |                                                                  |
|---------|---------------------------------------------|----------|--------|-----------------------|----------|-----------|-------|------------------------------------------------------------------|
| ko00460 | Cyanoamino acid metabolism                  | 3.39E-02 | K00600 | EC:2.1.2.1            | 19262129 | MAA_07843 | -1.02 | patatin-like phospholipase                                       |
| ko00460 | Cyanoamino acid metabolism                  | 3.39E-02 | K10675 | EC:4.2.1.66           | 19264611 | MAA_10325 | 1.69  | Nitrilase/cyanide hydratase and apolipoprotein N-acyltransferase |
| ko00650 | Butanoate metabolism                        | 4.04E-02 | K01580 | EC:4.1.1.15           | 19264332 | MAA_10046 | -3.68 | Aspartic acid decarboxylase, DtxS4                               |
| ko00650 | Butanoate metabolism                        | 4.04E-02 | K00022 | EC:1.1.1.35           | 19263128 | MAA_08842 | -1.45 | NAD(P)-binding domain protein                                    |
| ko00650 | Butanoate metabolism                        | 4.04E-02 | K00004 | EC:1.1.1.4;EC:1.1.1.- | 19263692 | MAA_09406 | 1.17  | hypothetical protein MAA_09406                                   |
| ko00650 | Butanoate metabolism                        | 4.04E-02 | K00019 | EC:1.1.1.30           | 19263497 | MAA_09211 | 1.19  | hypothetical protein MAA_09211                                   |
| ko00650 | Butanoate metabolism                        | 4.04E-02 | K01580 | EC:4.1.1.15           | 19264603 | MAA_10317 | 1.98  | pyridoxal-dependent decarboxylase domain protein                 |
| ko00333 | Prodigiosin biosyntheses                    | 4.19E-02 | K00059 | EC:1.1.1.100          | 19257526 | MAA_03240 | -3.79 | hypothetical protein MAA_03240                                   |
| ko00333 | Prodigiosin biosyntheses                    | 4.19E-02 | K00059 | EC:1.1.1.100          | 19264708 | MAA_10422 | -3.24 | hypothetical protein MAA_10422                                   |
| ko00333 | Prodigiosin biosyntheses                    | 4.19E-02 | K00059 | EC:1.1.1.100          | 19260992 | MAA_06706 | 2.30  | short-chain dehydrogenase                                        |
| ko00520 | Amino sugar and nucleotide sugar metabolism | 4.23E-02 | K01183 | EC:3.2.1.14           | 19263304 | MAA_09018 | -1.80 | Glycoside hydrolase, subgroup, catalytic core                    |
| ko00520 | Amino sugar and nucleotide sugar metabolism | 4.23E-02 | K01443 | EC:3.5.1.25           | 19256493 | MAA_02207 | -1.71 | carbohydrate esterase family 9 protein                           |
| ko00520 | Amino sugar and nucleotide sugar metabolism | 4.23E-02 | K01784 | EC:5.1.3.2            | 19261230 | MAA_06944 | -1.53 | UDP-glucose 4-epimerase                                          |
| ko00520 | Amino sugar and nucleotide sugar metabolism | 4.23E-02 | K01183 | EC:3.2.1.14           | 19256971 | MAA_02685 | -1.44 | chitinase                                                        |
| ko00520 | Amino sugar and nucleotide sugar metabolism | 4.23E-02 | K01183 | EC:3.2.1.14           | 19262044 | MAA_07758 | -1.29 | coagulation factor 5/8 type domain protein                       |
| ko00520 | Amino sugar and nucleotide sugar metabolism | 4.23E-02 | K20844 | EC:3.2.1.55           | 19254294 | MAA_00008 | -1.27 | Alpha-L-arabinofuranosidase B, catalytic                         |
| ko00520 | Amino sugar and nucleotide sugar metabolism | 4.23E-02 | K00844 | EC:2.7.1.1            | 19256497 | MAA_02211 | -1.24 | hexokinase-1                                                     |
| ko00520 | Amino sugar and nucleotide sugar metabolism | 4.23E-02 | K01233 | EC:3.2.1.132          | 19257096 | MAA_02810 | 1.24  | Fungal chitosanase                                               |

**Table S6.** Summation of KEGG pathways enriched to *M. robertsii* *ΔcfpI* versus WT strain.

| KEGG pathway name                           | Counts of genes |           |           |
|---------------------------------------------|-----------------|-----------|-----------|
|                                             | Down            | Up        | Subtotal  |
| Amino sugar and nucleotide sugar metabolism | 7               | 1         | 8         |
| Glycine, serine and threonine metabolism    | 6               | 6         | 12        |
| Fatty acid biosynthesis                     | 4               | 3         | 7         |
| Glycerophospholipid metabolism              | 5               | 6         | 11        |
| Tyrosine metabolism                         | 2               | 7         | 9         |
| beta-Alanine metabolism                     | 3               | 4         | 7         |
| Phenylalanine metabolism                    | 3               | 5         | 8         |
| Galactose metabolism                        | 5               | 0         | 5         |
| Histidine metabolism                        | 2               | 3         | 5         |
| Phagosome                                   | 5               | 1         | 6         |
| Cyanoamino acid metabolism                  | 3               | 1         | 4         |
| Butanoate metabolism                        | 2               | 3         | 5         |
| Prodigiosin biosyntheses                    | 2               | 1         | 3         |
| Vitamin B6 metabolism                       | 0               | 3         | 3         |
| <b>Total:</b>                               | <b>49</b>       | <b>44</b> | <b>93</b> |

**Table S7.** Differentially expressed genes related to phenotypes and genome stability of *M. robertsii* *Δcfp1* versus WT strain.

| gene_id                                                                                      | gene_name | log <sub>2</sub> R | q-value  | Annotation                                                  |
|----------------------------------------------------------------------------------------------|-----------|--------------------|----------|-------------------------------------------------------------|
| <b>Involved in cuticle degradation and virulence</b>                                         |           |                    |          |                                                             |
| 19261241                                                                                     | MAA_06955 | -11.71             | 1.04E-03 | lipase 2                                                    |
| 19263004                                                                                     | MAA_08718 | -6.63              | 4.34E-10 | Peptidase S8, subtilisin, Asp-active site protein           |
| 19259961                                                                                     | MAA_05675 | -4.48              | 4.98E-44 | alkaline serine protease P32                                |
| 19255283                                                                                     | MAA_00997 | -4.09              | 2.01E-12 | peptidase family M28                                        |
| 23632468                                                                                     | MAA_11020 | -3.77              | 2.95E-02 | peptidase S1 domain protein                                 |
| 19256231                                                                                     | MAA_01945 | -3.30              | 1.09E-25 | fungalysin metallopeptidase                                 |
| 19263878                                                                                     | MAA_09592 | -3.08              | 2.12E-25 | Peptidase S1/S6, chymotrypsin/Hap                           |
| 19255716                                                                                     | MAA_01430 | -2.98              | 1.99E-13 | Peptidase A1                                                |
| 19261160                                                                                     | MAA_06874 | -2.59              | 2.30E-11 | Necrosis inducing                                           |
| 19257548                                                                                     | MAA_03262 | -2.40              | 3.01E-10 | Peptidase S1/S6, chymotrypsin/Hap                           |
| 19262601                                                                                     | MAA_08315 | -2.30              | 1.80E-03 | Glycoside hydrolase, chitinase active site protein          |
| 19263527                                                                                     | MAA_09241 | -2.28              | 2.55E-02 | cysteine-rich secretory protein                             |
| 19254299                                                                                     | MAA_00013 | -2.17              | 2.08E-04 | lipase, class 3                                             |
| 19261774                                                                                     | MAA_07488 | -2.11              | 3.47E-10 | exo-1,3-beta-D-glucanase                                    |
| 19263304                                                                                     | MAA_09018 | -1.80              | 1.84E-04 | Glycoside hydrolase, subgroup, catalytic core               |
| 19262987                                                                                     | MAA_08701 | -1.69              | 8.60E-07 | subtilisin-like serine protease precursor                   |
| 19264329                                                                                     | MAA_10043 | -1.49              | 3.54E-16 | destruxin synthetase, DtxS1                                 |
| 19256971                                                                                     | MAA_02685 | -1.44              | 9.32E-09 | chitinase                                                   |
| 19261227                                                                                     | MAA_06941 | -1.35              | 6.29E-03 | extracellular serine-rich protein                           |
| 19261280                                                                                     | MAA_06994 | -1.33              | 6.14E-04 | secretory lipase                                            |
| 19255482                                                                                     | MAA_01196 | -1.32              | 2.84E-08 | cysteine-rich secreted protein                              |
| 19262103                                                                                     | MAA_07817 | -1.31              | 4.09E-04 | glycoside hydrolase family 76 protein                       |
| 19261083                                                                                     | MAA_06797 | -1.24              | 1.80E-07 | peptidase family M28                                        |
| 19263922                                                                                     | MAA_09636 | -1.21              | 3.14E-04 | subtilisin-like protease                                    |
| 19263848                                                                                     | MAA_09562 | -1.18              | 2.15E-02 | fatty acid hydroxylase superfamily protein                  |
| 19255800                                                                                     | MAA_01514 | -1.18              | 5.15E-06 | Peptidase A1                                                |
| 19255594                                                                                     | MAA_01308 | -1.14              | 8.18E-06 | Peptidase S8/S53, subtilisin/kexin/sedolisin                |
| 19263915                                                                                     | MAA_09629 | -1.08              | 1.42E-06 | Glycoside hydrolase, family 35                              |
| 19260432                                                                                     | MAA_06146 | -1.06              | 6.92E-10 | glycoside hydrolase family 3 protein                        |
| 19262454                                                                                     | MAA_08168 | -1.03              | 8.43E-03 | Peptidase S8, subtilisin-related protein                    |
| 19255412                                                                                     | MAA_01126 | -1.02              | 4.99E-04 | Alpha/beta hydrolase fold-3                                 |
| 19262692                                                                                     | MAA_08406 | 1.10               | 1.22E-03 | glycoside hydrolase family 16                               |
| 19260689                                                                                     | MAA_06403 | 1.21               | 9.41E-06 | glycoside hydrolase family 76 protein                       |
| 19264818                                                                                     | MAA_10532 | 1.23               | 2.06E-02 | peptidase family M3                                         |
| 19257096                                                                                     | MAA_02810 | 1.24               | 2.14E-03 | Fungal chitosanase                                          |
| 19254778                                                                                     | MAA_00492 | 1.28               | 1.05E-11 | subtilisin-like protease                                    |
| 19258326                                                                                     | MAA_04040 | 1.41               | 3.83E-03 | alpha/beta hydrolase                                        |
| 19264734                                                                                     | MAA_10448 | 1.92               | 1.87E-05 | hydrolase                                                   |
| 19257622                                                                                     | MAA_03336 | 1.94               | 2.40E-07 | Peptidase S8/S53, subtilisin/kexin/sedolisin                |
| <b>Involved in cell wall composition, hydrocarbon epitopes and response to host immunity</b> |           |                    |          |                                                             |
| 19263490                                                                                     | MAA_09204 | -5.66              | 1.11E-18 | Concanavalin A-like lectin/glucanase                        |
| 19262598                                                                                     | MAA_08312 | -5.18              | 1.21E-43 | cell wall protein                                           |
| 19260495                                                                                     | MAA_06209 | -3.07              | 2.13E-10 | Concanavalin A-like lectin/glucanase                        |
| 19255921                                                                                     | MAA_01635 | -2.92              | 3.44E-04 | integral membrane protein pth11                             |
| 19262575                                                                                     | MAA_08289 | -2.35              | 1.96E-03 | cell surface protein (Mas1)                                 |
| 19256825                                                                                     | MAA_02539 | -1.86              | 6.22E-06 | cell surface protein (Mas1)                                 |
| 19261096                                                                                     | MAA_06810 | -1.81              | 1.48E-06 | FK506 suppressor Sfk1                                       |
| 19257628                                                                                     | MAA_03342 | -1.53              | 2.32E-05 | integral membrane protein                                   |
| 19256950                                                                                     | MAA_02664 | -1.40              | 1.74E-07 | actin filament organization protein App1-like protein       |
| 19256461                                                                                     | MAA_02175 | -1.36              | 1.09E-04 | immunoglobulin I-set domain-containing protein              |
| 19261596                                                                                     | MAA_07310 | -1.34              | 5.44E-04 | integral membrane family protein                            |
| 19261473                                                                                     | MAA_07187 | -1.09              | 1.24E-11 | expression library immunization antigen 1                   |
| 19264584                                                                                     | MAA_10298 | 1.04               | 2.25E-02 | hydrophobin                                                 |
| 19263358                                                                                     | MAA_09072 | 1.17               | 1.39E-02 | cell wall galactomannoprotein Mp2/allergen F17-like protein |
| 19255705                                                                                     | MAA_01419 | 4.01               | 2.64E-03 | Calcium-mediated lectin                                     |
| <b>Involved in cellular transport and homeostasis</b>                                        |           |                    |          |                                                             |
| 19262600                                                                                     | MAA_08314 | -5.35              | 1.77E-03 | ATPase                                                      |



|                                  |           |       |          |                                                                     |
|----------------------------------|-----------|-------|----------|---------------------------------------------------------------------|
| 19263823                         | MAA_09537 | -5.23 | 1.69E-04 | MFS1 family protein                                                 |
| 19264334                         | MAA_10048 | -3.21 | 7.70E-27 | abc transporter                                                     |
| 19264333                         | MAA_10047 | -3.17 | 1.21E-25 | V-type ATPase                                                       |
| 19259842                         | MAA_05556 | -2.72 | 2.47E-03 | potassium/sodium efflux P-type ATPase                               |
| 19259759                         | MAA_05473 | -2.32 | 7.02E-05 | siderophore iron transporter mirB                                   |
| 19262202                         | MAA_07916 | -2.26 | 2.10E-02 | major facilitator superfamily transporter                           |
| 19256668                         | MAA_02382 | -1.91 | 3.05E-09 | Oligopeptide transporter OPT superfamily                            |
| 19260674                         | MAA_06388 | -1.90 | 3.36E-12 | Cd2+/Zn2+ transporter protein                                       |
| 19258334                         | MAA_04048 | -1.90 | 1.77E-03 | major facilitator superfamily transporter                           |
| 19264673                         | MAA_10387 | -1.89 | 4.30E-06 | ZIP Zinc transporter                                                |
| 19259726                         | MAA_05440 | -1.83 | 7.89E-08 | Phosphate transporter                                               |
| 19263051                         | MAA_08765 | -1.78 | 7.74E-16 | sugar transporter-like protein                                      |
| 19256663                         | MAA_02377 | -1.71 | 2.94E-06 | ATP-binding cassette transporter ift1                               |
| 19264281                         | MAA_09995 | -1.63 | 9.51E-07 | major facilitator superfamily transporter                           |
| 19260324                         | MAA_06038 | -1.57 | 2.17E-05 | pH regulatory protein mrPacC                                        |
| 19261285                         | MAA_06999 | -1.56 | 2.04E-03 | major facilitator superfamily transporter                           |
| 19256624                         | MAA_02338 | -1.55 | 9.31E-07 | General substrate transporter                                       |
| 19259755                         | MAA_05469 | -1.46 | 7.73E-06 | siderophore iron transporter                                        |
| 19264010                         | MAA_09724 | -1.37 | 4.85E-04 | ATPase, P-type, potassium/sodium efflux, fungal                     |
| 19260235                         | MAA_05949 | -1.31 | 3.63E-07 | cation transporter                                                  |
| 19263703                         | MAA_09417 | -1.30 | 1.85E-06 | oligopeptide transporter                                            |
| 19254593                         | MAA_00307 | -1.30 | 1.74E-04 | siderophore iron transporter                                        |
| 19255487                         | MAA_01201 | -1.20 | 1.16E-03 | Ctr copper transporter                                              |
| 19257045                         | MAA_02759 | -1.18 | 3.29E-06 | Ca2+ permeable channel                                              |
| 19264416                         | MAA_10130 | -1.09 | 1.29E-02 | Major facilitator superfamily domain, general substrate transporter |
| 19259102                         | MAA_04816 | -1.08 | 1.97E-07 | cation transporting ATPase                                          |
| 19257500                         | MAA_03214 | -1.08 | 2.47E-05 | Amino acid transporter, transmembrane                               |
| 19260619                         | MAA_06333 | -1.05 | 1.43E-02 | AAA family ATPase                                                   |
| 19256077                         | MAA_01791 | -1.05 | 2.89E-02 | Major facilitator superfamily domain protein                        |
| 19255636                         | MAA_01350 | -1.02 | 1.05E-02 | general substrate transporter                                       |
| 19260940                         | MAA_06654 | -1.00 | 2.57E-11 | ferrioxamine B transporter                                          |
| 19261806                         | MAA_07520 | 1.00  | 2.23E-03 | major facilitator superfamily transporter                           |
| 19262654                         | MAA_08368 | 1.01  | 1.85E-04 | major facilitator superfamily transporter                           |
| 19263316                         | MAA_09030 | 1.02  | 1.81E-02 | Sodium/solute symporter                                             |
| 19263390                         | MAA_09104 | 1.10  | 1.93E-10 | aaa ATPase                                                          |
| 19260584                         | MAA_06298 | 1.19  | 1.72E-04 | MFS transporter [Metarhizium robertsii]                             |
| 19259936                         | MAA_05650 | 1.30  | 3.82E-02 | MFS transporter                                                     |
| 19258027                         | MAA_03741 | 1.57  | 1.62E-02 | Major facilitator superfamily domain, general substrate transporter |
| 19262905                         | MAA_08619 | 1.97  | 5.09E-07 | choline transport protein                                           |
| 19256607                         | MAA_02321 | 2.02  | 8.58E-12 | Major facilitator superfamily domain, general substrate transporter |
| 19264481                         | MAA_10195 | 2.07  | 1.54E-04 | Ctr copper transporter                                              |
| 19257555                         | MAA_03269 | 5.05  | 3.68E-02 | membrane transporter                                                |
| <b>Involved in transcription</b> |           |       |          |                                                                     |
| 19261383                         | MAA_07097 | -3.19 | 5.20E-03 | C2H2 transcription factor                                           |
| 19261778                         | MAA_07492 | -1.78 | 3.68E-03 | c6 zinc finger domain containing protein                            |
| 19264428                         | MAA_10142 | -1.64 | 9.04E-03 | Zn(2)-C6 fungal-type DNA-binding domain protein                     |
| 19264998                         | MAA_10714 | -1.63 | 1.95E-03 | C6 transcription factor                                             |
| 19257988                         | MAA_03702 | -1.61 | 1.80E-04 | transcription factor RfeG                                           |
| 19255066                         | MAA_00780 | -1.47 | 3.20E-05 | zinc finger protein dhhc domain containing protein                  |
| 19258825                         | MAA_04539 | -1.41 | 1.30E-05 | Zn(2)-Cys(6) zinc finger domain protein                             |
| 19256488                         | MAA_02202 | -1.26 | 1.95E-08 | zinc finger protein 58                                              |
| 19264231                         | MAA_09945 | -1.22 | 2.95E-02 | c6 zinc finger domain containing protein                            |
| 19257739                         | MAA_03453 | -1.21 | 2.18E-05 | fungal specific transcription factor                                |
| 19257577                         | MAA_03291 | -1.13 | 7.12E-04 | Zn(2)-C6 fungal-type DNA-binding domain protein                     |
| 19255138                         | MAA_00852 | -1.06 | 1.30E-02 | swim zinc finger domain protein                                     |
| 19260351                         | MAA_06065 | -1.06 | 2.47E-02 | Basic-leucine zipper (bZIP) transcription factor                    |
| 23633238                         | MAA_11790 | 1.02  | 1.80E-03 | Zn(2)-Cys(6) zinc finger domain protein, partial                    |
| 19264907                         | MAA_10621 | 1.04  | 1.64E-02 | MYB DNA-binding domain-containing protein                           |
| 19263417                         | MAA_09131 | 1.04  | 7.14E-06 | zinc finger domain-containing protein                               |
| 19262889                         | MAA_08603 | 1.04  | 4.53E-06 | transcription factor Cys6                                           |
| 23633159                         | MAA_11711 | 1.04  | 1.09E-03 | zinc finger domain-containing protein                               |

|                                                    |           |        |          |                                                        |
|----------------------------------------------------|-----------|--------|----------|--------------------------------------------------------|
| 23633188                                           | MAA_11740 | 1.10   | 3.74E-14 | Zn(2)-C6 fungal-type DNA-binding domain protein        |
| 19260311                                           | MAA_06025 | 2.51   | 1.02E-12 | PRO1A C6 Zink-finger protein                           |
| 19264326                                           | MAA_10040 | 2.84   | 2.30E-11 | Zn(2)-Cys(6) zinc finger domain protein                |
| 19264403                                           | MAA_10117 | 10.70  | 1.17E-02 | Zn(2)-C6 fungal-type DNA-binding domain protein        |
| <b>Involved in posttranslational modifications</b> |           |        |          |                                                        |
| 23633036                                           | MAA_11588 | -9.96  | 3.33E-04 | SET domain protein                                     |
| 19257561                                           | MAA_03275 | -3.64  | 3.05E-02 | transferase                                            |
| 19255287                                           | MAA_01001 | -1.61  | 9.33E-05 | GCN5-related N-acetyltransferase (GNAT) domain protein |
| 19259756                                           | MAA_05470 | -1.30  | 3.09E-02 | transferase family protein                             |
| 19258535                                           | MAA_04249 | -1.16  | 1.25E-02 | methyltransferase                                      |
| 19260739                                           | MAA_06453 | -1.04  | 2.93E-03 | GCN5-related N-acetyltransferase (GNAT) domain protein |
| 23632270                                           | MAA_10821 | -1.03  | 5.64E-03 | ubiquitin-conjugating enzyme                           |
| 19256214                                           | MAA_01928 | -1.02  | 4.42E-02 | Ubiquitin 3 binding protein But2                       |
| 19255584                                           | MAA_01298 | 1.01   | 1.81E-02 | O-methyltransferase                                    |
| 19260841                                           | MAA_06555 | 1.02   | 2.03E-03 | methyltransferase                                      |
| 19255392                                           | MAA_01106 | 1.07   | 1.30E-08 | Ubiquitin supergroup                                   |
| 19254406                                           | MAA_00120 | 1.45   | 7.43E-18 | Methyltransferase type 11                              |
| 19262652                                           | MAA_08366 | 1.80   | 3.44E-07 | methyltransferase                                      |
| <b>Involved in RNA/DNA processing and events</b>   |           |        |          |                                                        |
| 19254709                                           | MAA_00423 | -16.96 | 1.99E-21 | Ribonuclease H-like protein                            |
| 23632372                                           | MAA_10923 | -14.77 | 4.07E-09 | Ankyrin repeat-containing domain protein               |
| 19254669                                           | MAA_00383 | -13.98 | 9.65E-10 | Ribonuclease H-like protein                            |
| 19255569                                           | MAA_01283 | -12.64 | 1.02E-07 | Ribonuclease H-like protein                            |
| 19263074                                           | MAA_08788 | -3.60  | 2.98E-05 | ankyrin repeat-containing protein                      |
| 19262592                                           | MAA_08306 | -3.45  | 1.96E-04 | Ankyrin repeat protein                                 |
| 23632897                                           | MAA_11449 | -2.96  | 2.28E-17 | Ankyrin repeat-containing domain protein               |
| 19257630                                           | MAA_03344 | -2.92  | 1.61E-02 | ankyrin repeat containing protein                      |
| 23632640                                           | MAA_11192 | -2.20  | 4.26E-03 | ankyrin repeat protein [Metarhizium robertsii]         |
| 19262060                                           | MAA_07774 | -2.19  | 1.16E-02 | ankyrin protein                                        |
| 19255215                                           | MAA_00929 | -2.17  | 3.22E-07 | Ribonuclease H-like protein                            |
| 19264518                                           | MAA_10232 | -1.88  | 2.63E-03 | ankyrin repeat containing protein                      |
| 19261648                                           | MAA_07362 | -1.85  | 9.81E-04 | RNA-directed RNA polymerase (Sad-1)                    |
| 19262660                                           | MAA_08374 | -1.34  | 9.35E-03 | ankyrin repeat protein                                 |
| 19254739                                           | MAA_00453 | -1.22  | 3.61E-04 | Ribonuclease T2, active site protein                   |
| 19263485                                           | MAA_09199 | -1.12  | 4.92E-04 | ATP-dependent RNA helicase DED1                        |
| 19263684                                           | MAA_09398 | -1.10  | 5.56E-03 | Ankyrin repeat protein                                 |
| 19262532                                           | MAA_08246 | -1.09  | 1.42E-04 | ankyrin repeat domain containing protein               |
| 19255698                                           | MAA_01412 | -1.06  | 5.14E-04 | Ankyrin repeat-containing domain protein               |
| 19258332                                           | MAA_04046 | -1.02  | 1.34E-02 | RNA recognition motif domain protein                   |
| 19263400                                           | MAA_09114 | 1.01   | 5.60E-05 | Ribonuclease H-like protein                            |
| 23633286                                           | MAA_11838 | 1.04   | 5.78E-05 | Ankyrin repeat-containing domain protein               |
| 19255677                                           | MAA_01391 | 1.06   | 1.23E-04 | transposase                                            |
| 23632365                                           | MAA_10916 | 1.06   | 1.38E-02 | Ribonuclease H-like protein                            |
| 19254667                                           | MAA_00381 | 1.11   | 1.81E-02 | Ribonuclease H-like protein                            |
| 19264434                                           | MAA_10148 | 1.13   | 4.59E-03 | ATP-dependent DNA helicase PIF1                        |
| 19264450                                           | MAA_10164 | 1.14   | 7.77E-09 | reverse transcriptase, RNaseH                          |
| 19255217                                           | MAA_00931 | 1.16   | 5.94E-12 | Ribonuclease H-like protein                            |
| 19264446                                           | MAA_10160 | 1.20   | 8.86E-16 | transposase-like protein                               |
| 19264834                                           | MAA_10548 | 1.23   | 3.44E-04 | ATP-dependent DNA helicase PIF1                        |
| 19264445                                           | MAA_10159 | 1.24   | 5.66E-08 | restless-like transposase                              |
| 19259838                                           | MAA_05552 | 1.24   | 7.29E-03 | ribosomal protein L1                                   |
| 19264635                                           | MAA_10349 | 1.28   | 6.35E-16 | ATP-dependent DNA helicase PIF1                        |
| 23632921                                           | MAA_11473 | 1.30   | 2.14E-03 | Ankyrin repeat-containing domain protein               |
| 23632196                                           | MAA_10747 | 1.39   | 3.28E-03 | ankyrin repeat protein                                 |
| 19264853                                           | MAA_10567 | 1.42   | 3.77E-04 | restless-like transposase                              |
| 19264448                                           | MAA_10162 | 1.50   | 1.25E-10 | transposase-like protein                               |
| 19255201                                           | MAA_00915 | 1.66   | 6.20E-06 | Ribonuclease H-like protein                            |
| 19254647                                           | MAA_00361 | 1.71   | 7.92E-15 | transposase-like protein                               |
| 23633210                                           | MAA_11762 | 1.93   | 5.16E-04 | reverse transcriptase                                  |
